# Supplementary material for: Genome Sequence Analysis Reveals Selection Signatures in Endangered Trypanotolerant West African Muturu Cattle
Source: PubMed Central journal article supplement (PMC6558954; doi:10.3389/fgene.2019.00442), 2019-06-04
Supplement: Data_Sheet_2.pdf [file Data_Sheet_2.pdf]

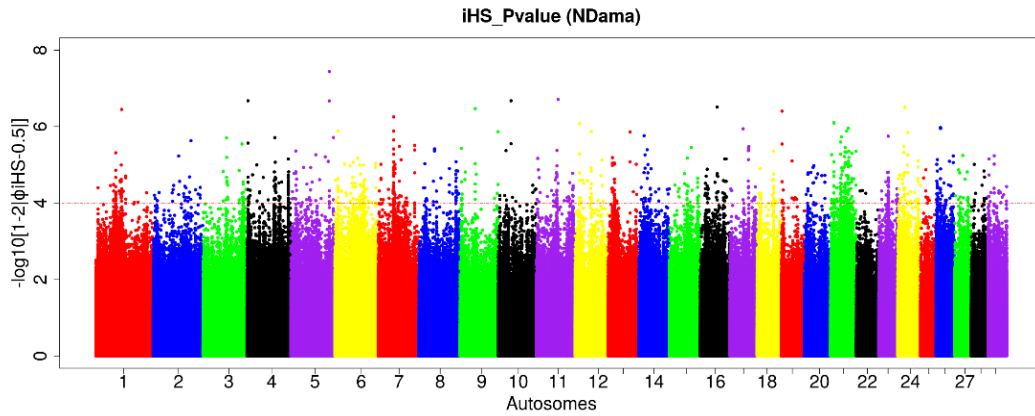

**Supplementary Figure S1 | Manhattan plot of the genome-wide distribution of *iHS* scores for the autosomes in N'Dama cattle. The red dash line indicates the threshold of  $P < 0.0001$  (equivalent of  $-\log(iHS) > 4$ ) at which windows are considered under selection**

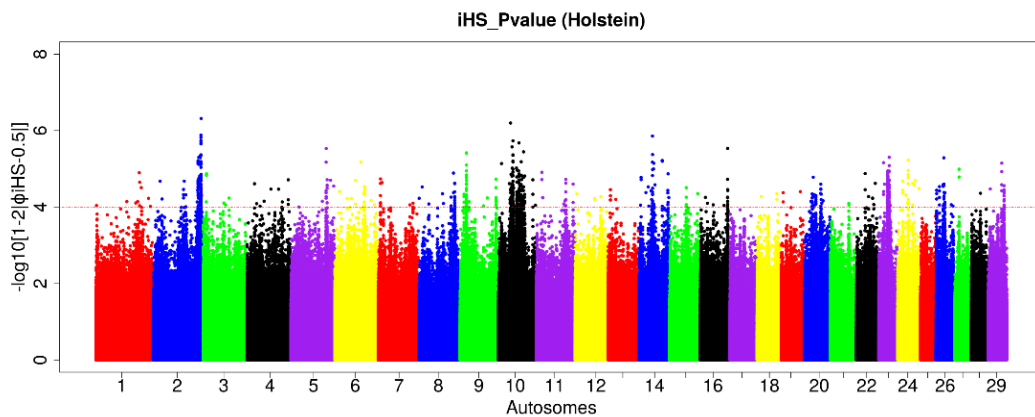

**Supplementary Figure S2 | Manhattan plot of the genome-wide distribution of *iHS* scores for the autosomes in Holstein cattle. The red dash line indicates the threshold of  $P < 0.0001$  (equivalent of  $-\log(iHS) > 4$ ) at which windows are considered under selection**

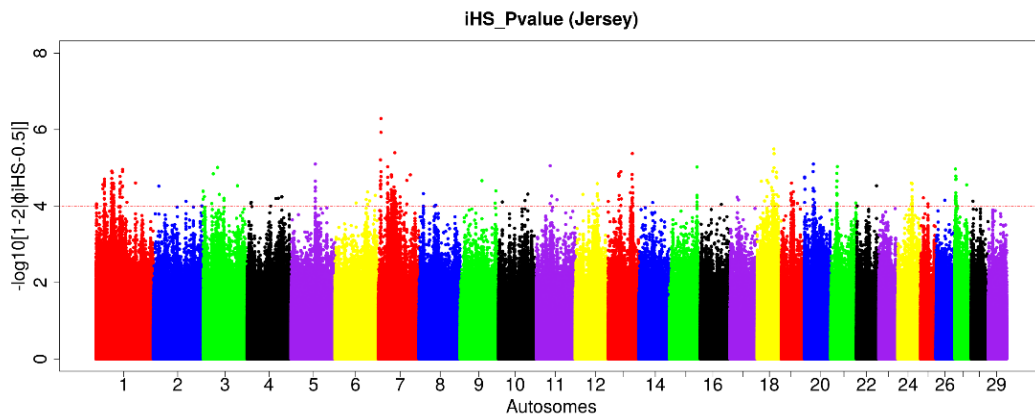

**Supplementary Figure S3 | Manhattan plot of the genome-wide distribution of *iHS* scores for the autosomes in Jersey cattle. The red dash line indicates the threshold of  $P < 0.0001$  (equivalent of  $-\log(iHS) > 4$ ) at which windows are considered under selection**

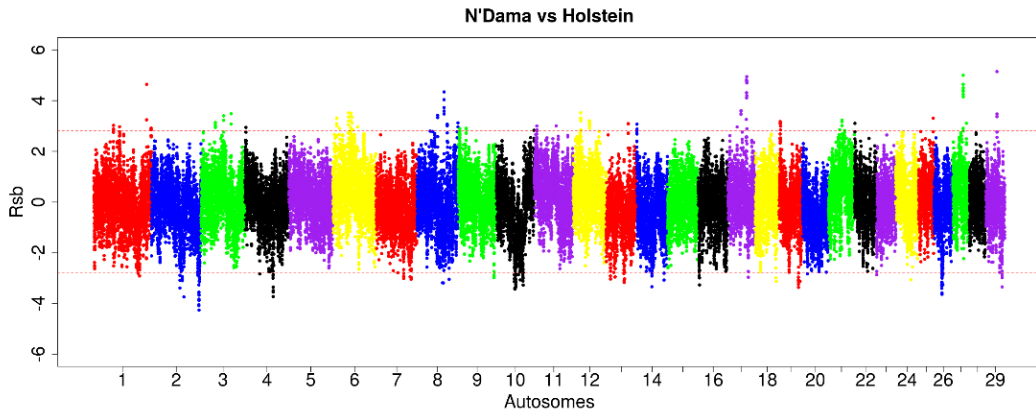

**Supplementary Figure S4 | Manhattan plot of the genome-wide distribution of *Rsb* N'Dama - Holstein. Red dash lines are the threshold of the windows in the top 0.5% *Rsb* scores**

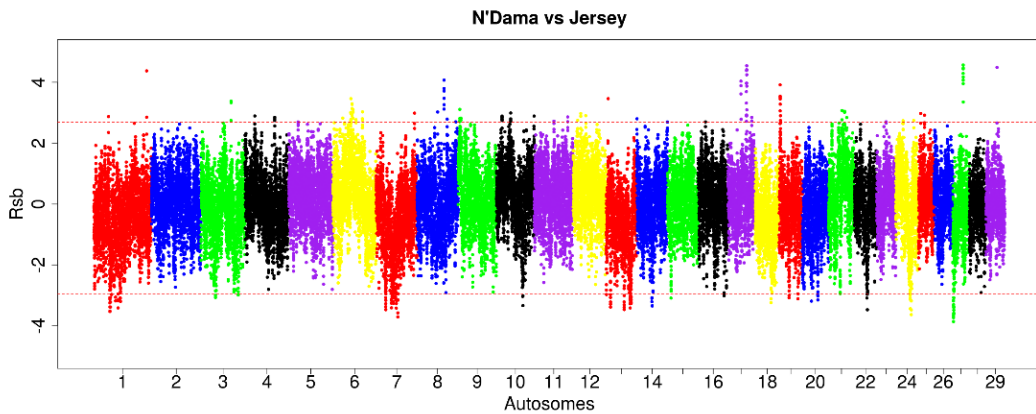

**Supplementary Figure S5 | Manhattan plot of the genome-wide distribution of *Rsb* N'Dama - Jersey. Red dash lines are the threshold of the windows in the top 0.5% *Rsb* scores**

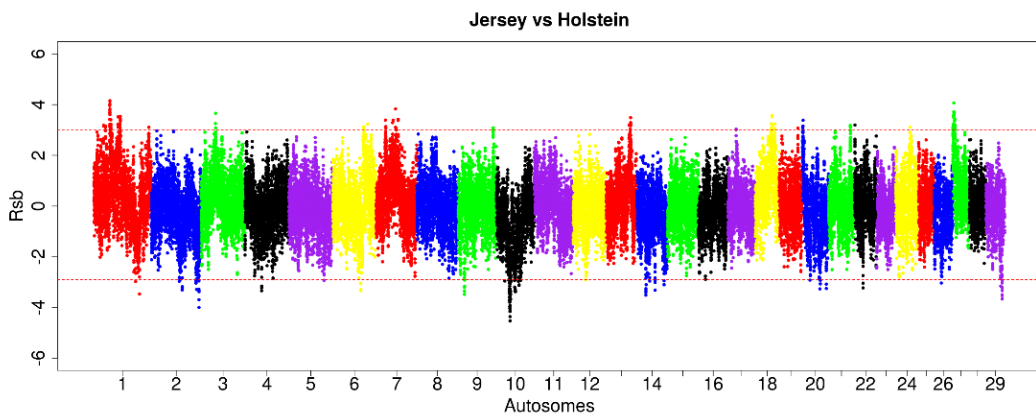

**Supplementary Figure S6 | Manhattan plot of the genome-wide distribution of *Rsb* Jersey - Holstein. Red dash lines are the threshold of the windows in the top 0.5% *Rsb* scores**

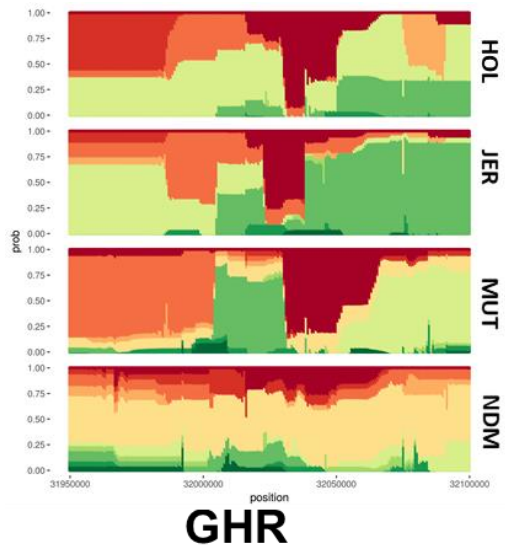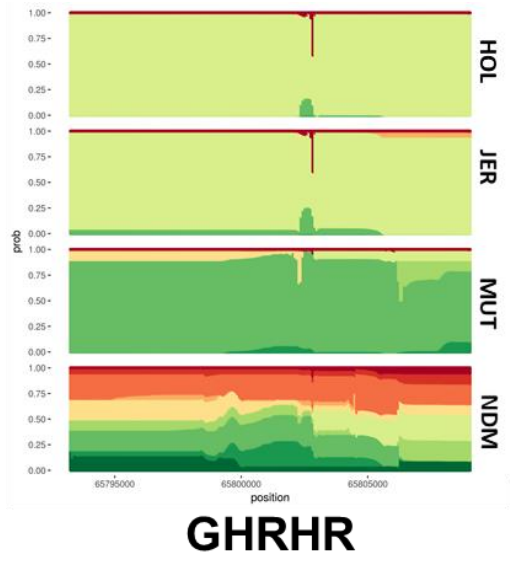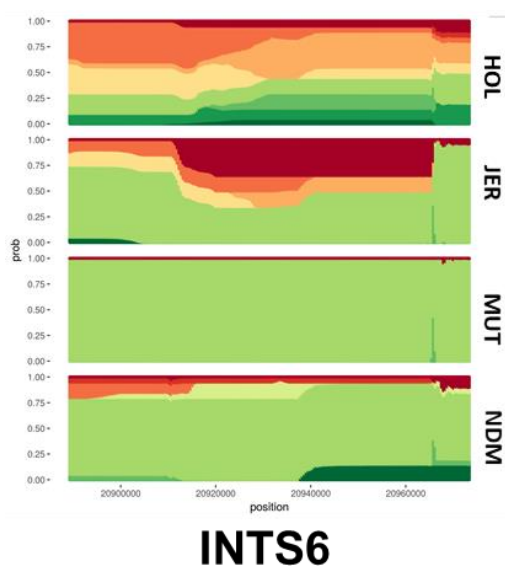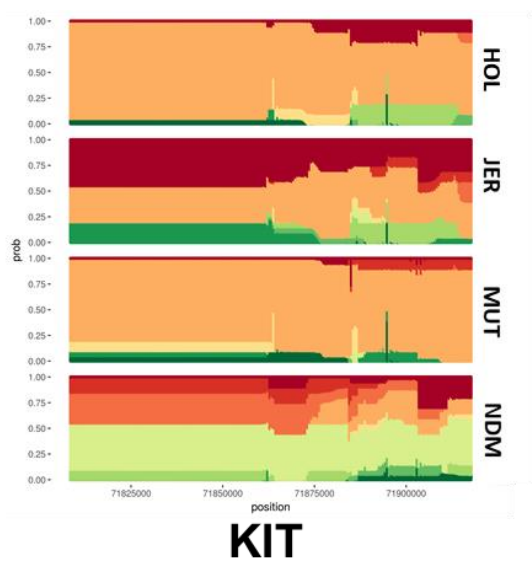

**Supplementary Figure S7 | Haplotype diversity for African and European taurine breeds in genomic regions of four candidate genes between Muturu and other taurine breeds**

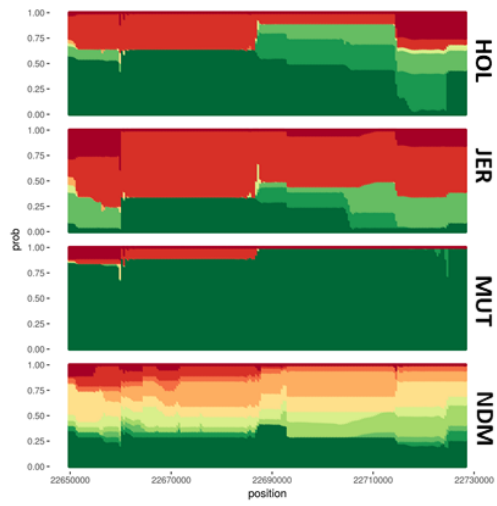

**OLA1**

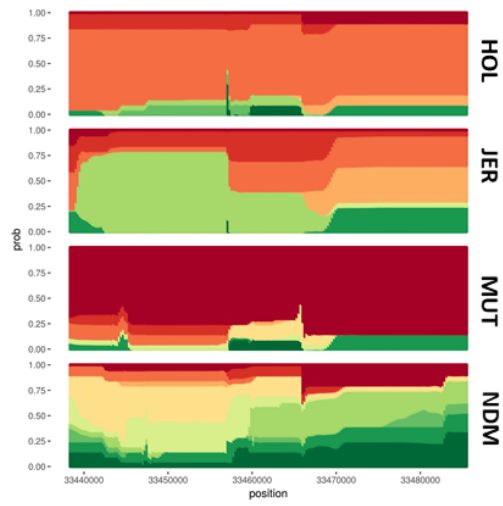

**NPC1**

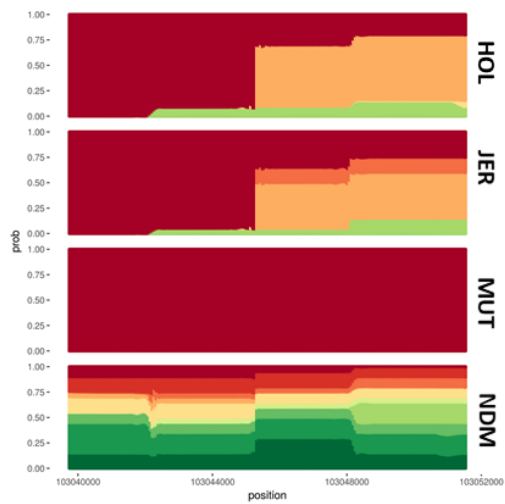

**GFI1B**

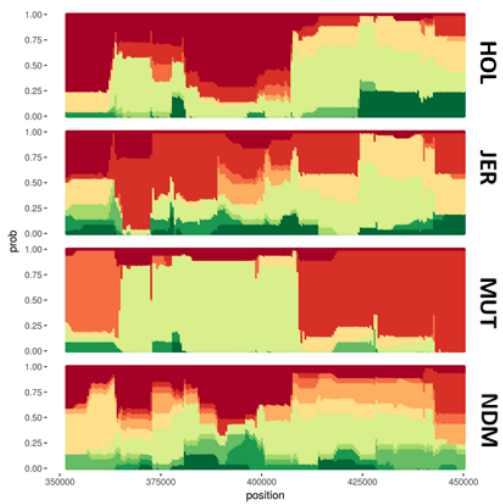

**RCAN1**

**Supplementary Figure S8 | Haplotype diversity for four taurine breeds in genomic regions of four Muturu candidate genes detected following Rsb comparison test between Muturu and three other *Bos taurus* breeds.**
