# Supplementary material for: Genome Sequence Analysis Reveals Selection Signatures in Endangered Trypanotolerant West African Muturu Cattle
Source: Front Genet. 2019 Jun 4;10:442. doi: 10.3389/fgene.2019.00442 (PMC6558954; doi:10.3389/fgene.2019.00442)
Supplement: Supplementary file 1 [file Data_Sheet_1.xlsx]

## Sheet: S1
Supplemenatry Table S1 | Summary statistics of Muturu sequence data
Sample ID	DNA	Total reads	Alignment	Mean depth	Genome
	sequenced (Gb)		rate		Coverage (%)
MUT001	30.063	188884710	0.99	8.76	98.4
MUT002	32.675	218811829	0.99	9.96	98.8
MUT003	36.095	240635522	0.99	10.41	98.5
MUT004	35.152	234425064	0.99	9.74	98.3
MUT005	32.998	219989008	0.99	8.61	98.4
MUT006	31.442	209619170	0.99	6.54	96.8
MUT007	31.445	209630704	0.99	6.73	96.8
MUT008	29.927	199312278	0.99	7.48	97.6
MUT009	33.051	220336786	0.99	8.6	97.7
MUT010	31.331	208872384	0.99	6.45	97.4

## Sheet: S2
Supplemenatry Table S2 | Estimate of Pairwise Nei's Genetic Distance (D) between Muturu and three other B. taurus breeds
HOL	0	0.04034	0.07885	0.08866
JER	0.04034	0	0.07986	0.08917
MUT	0.07885	0.07986	0	0.06558
NDM	0.08866	0.08917	0.06558	0

## Sheet: S3
Supplemenatry Table S3 | Estimate of Pairwise Nei's Genetic Distances (D) among samples of Muturu and three other B. taurus breeds
HOL1962	0	0.08966	0.06173	0.08872	0.07018	0.08948	0.09414	0.0912	0.04862	0.08549	0.11823	0.11928	0.11866	0.12263	0.11609	0.12369	0.12051	0.12265	0.12259	0.1202	0.14953	0.14844	0.14934	0.15121	0.14953	0.14999	0.15104	0.14936	0.15059	0.14887	0.18169	0.17612	0.17338	0.17377	0.17933	0.17555	0.17808	0.18176	0.1779	0.17814
HOL3642	0.08966	0	0.08853	0.08991	0.0863	0.08974	0.09426	0.08254	0.08631	0.08166	0.11727	0.11837	0.11921	0.12213	0.11646	0.12301	0.11945	0.12192	0.12272	0.11899	0.1487	0.14738	0.14804	0.14983	0.14845	0.14834	0.14979	0.14835	0.14976	0.14834	0.18206	0.17476	0.174	0.17302	0.17979	0.17507	0.17752	0.18205	0.17736	0.17857
HOL4121	0.06173	0.08853	0	0.08879	0.07812	0.08947	0.08791	0.0916	0.07145	0.08534	0.11547	0.11609	0.11692	0.12033	0.11385	0.12126	0.11735	0.12052	0.12026	0.11764	0.14654	0.14559	0.14591	0.14808	0.14638	0.14669	0.14807	0.14624	0.14744	0.14621	0.18069	0.17332	0.17153	0.17161	0.17771	0.17337	0.17638	0.18048	0.17636	0.17639
HOL5005	0.08872	0.08991	0.08879	0	0.07752	0.08324	0.08721	0.09103	0.09512	0.08897	0.11864	0.11974	0.11957	0.12434	0.11683	0.12346	0.12071	0.12353	0.1237	0.1201	0.14965	0.1485	0.14863	0.15091	0.14914	0.14928	0.14993	0.14939	0.15112	0.14879	0.18264	0.17603	0.1746	0.17375	0.18065	0.17585	0.17849	0.1818	0.17823	0.17947
HOL5143	0.07018	0.0863	0.07812	0.07752	0	0.08716	0.08938	0.09066	0.06021	0.08374	0.11804	0.11895	0.11874	0.12282	0.11679	0.12387	0.12069	0.12317	0.12341	0.11981	0.14944	0.14806	0.14883	0.1504	0.14998	0.15014	0.15067	0.1492	0.15065	0.14913	0.18339	0.17589	0.1745	0.17397	0.18	0.17526	0.17886	0.18276	0.17898	0.17905
HOL5543	0.08948	0.08974	0.08947	0.08324	0.08716	0	0.09129	0.08414	0.08483	0.0855	0.11712	0.11883	0.11924	0.12263	0.11655	0.12308	0.1199	0.12197	0.12304	0.11946	0.1479	0.14675	0.1474	0.14927	0.14827	0.14822	0.1482	0.14843	0.15028	0.14759	0.18169	0.1752	0.17351	0.17275	0.1791	0.17477	0.17693	0.18127	0.17751	0.1779
HOL6677	0.09414	0.09426	0.08791	0.08721	0.08938	0.09129	0	0.09113	0.09492	0.09101	0.11482	0.11636	0.11647	0.12086	0.11367	0.1211	0.11821	0.12018	0.12138	0.11842	0.1479	0.14586	0.14667	0.14857	0.14724	0.14728	0.14773	0.14771	0.14881	0.14665	0.18106	0.17419	0.17321	0.1725	0.17881	0.17431	0.17662	0.18053	0.17724	0.1778
HOL8124	0.0912	0.08254	0.0916	0.09103	0.09066	0.08414	0.09113	0	0.09079	0.08154	0.11517	0.11721	0.11759	0.12156	0.1143	0.12164	0.11832	0.12088	0.12103	0.11702	0.14829	0.14711	0.1473	0.1494	0.14827	0.14825	0.1491	0.14787	0.1491	0.1473	0.18133	0.17444	0.17307	0.17273	0.17791	0.17369	0.1762	0.18088	0.17648	0.17707
HOL8172	0.04862	0.08631	0.07145	0.09512	0.06021	0.08483	0.09492	0.09079	0	0.08463	0.11888	0.1197	0.11974	0.1229	0.11672	0.12385	0.12074	0.1232	0.12314	0.12105	0.15033	0.14901	0.15022	0.15146	0.15045	0.15072	0.1508	0.14948	0.15148	0.14925	0.18213	0.17617	0.17403	0.17434	0.18025	0.17586	0.17815	0.18321	0.17843	0.17943
HOL8586	0.08549	0.08166	0.08534	0.08897	0.08374	0.0855	0.09101	0.08154	0.08463	0	0.11713	0.11848	0.11757	0.12126	0.11544	0.12269	0.11965	0.1222	0.12285	0.11949	0.1486	0.14729	0.14819	0.1496	0.14918	0.14959	0.14927	0.14867	0.14993	0.14814	0.18182	0.17478	0.17313	0.17343	0.17918	0.17426	0.17693	0.18129	0.17783	0.17802
JER001	0.11823	0.11727	0.11547	0.11864	0.11804	0.11712	0.11482	0.11517	0.11888	0.11713	0	0.09211	0.09114	0.10101	0.09043	0.09782	0.09421	0.09409	0.09606	0.09534	0.15008	0.14791	0.14869	0.1508	0.14975	0.14973	0.15056	0.14909	0.15099	0.14852	0.18251	0.17583	0.17528	0.17408	0.18088	0.17552	0.17741	0.18225	0.17828	0.18025
JER002	0.11928	0.11837	0.11609	0.11974	0.11895	0.11883	0.11636	0.11721	0.1197	0.11848	0.09211	0	0.09409	0.09873	0.08939	0.10058	0.09795	0.09645	0.09755	0.09889	0.15103	0.14915	0.14957	0.15181	0.15106	0.15037	0.15189	0.15014	0.15205	0.15002	0.1835	0.17621	0.17608	0.17533	0.18121	0.17626	0.1783	0.18266	0.17909	0.18047
JER003	0.11866	0.11921	0.11692	0.11957	0.11874	0.11924	0.11647	0.11759	0.11974	0.11757	0.09114	0.09409	0	0.09665	0.08403	0.09701	0.09043	0.09335	0.09185	0.09187	0.15105	0.14964	0.15072	0.1527	0.15121	0.15126	0.15238	0.15093	0.15261	0.15065	0.18443	0.17678	0.17674	0.17578	0.18204	0.17661	0.17994	0.1842	0.17997	0.1813
JER004	0.12263	0.12213	0.12033	0.12434	0.12282	0.12263	0.12086	0.12156	0.1229	0.12126	0.10101	0.09873	0.09665	0	0.0929	0.10498	0.09893	0.10415	0.10403	0.10019	0.15497	0.15433	0.15374	0.15651	0.15538	0.15498	0.15624	0.15388	0.15586	0.15373	0.18769	0.18089	0.17984	0.1791	0.18573	0.18049	0.18306	0.18691	0.18282	0.1847
JER005	0.11609	0.11646	0.11385	0.11683	0.11679	0.11655	0.11367	0.1143	0.11672	0.11544	0.09043	0.08939	0.08403	0.0929	0	0.09449	0.08888	0.09162	0.09173	0.09059	0.14807	0.14667	0.14707	0.14949	0.14839	0.14833	0.14897	0.14796	0.14908	0.14743	0.18079	0.1741	0.17448	0.17327	0.17904	0.17439	0.17653	0.18089	0.17704	0.17886
JER007	0.12369	0.12301	0.12126	0.12346	0.12387	0.12308	0.1211	0.12164	0.12385	0.12269	0.09782	0.10058	0.09701	0.10498	0.09449	0	0.08495	0.07584	0.07331	0.08355	0.15592	0.15432	0.15457	0.15706	0.15635	0.15658	0.15713	0.15493	0.15734	0.1549	0.18821	0.18155	0.18109	0.1803	0.18542	0.18113	0.18394	0.18835	0.1843	0.18487
JER009	0.12051	0.11945	0.11735	0.12071	0.12069	0.1199	0.11821	0.11832	0.12074	0.11965	0.09421	0.09795	0.09043	0.09893	0.08888	0.08495	0	0.0801	0.07799	0.07558	0.15131	0.15081	0.15066	0.15326	0.15179	0.15197	0.1535	0.15156	0.15335	0.15117	0.18432	0.1779	0.17707	0.17643	0.18229	0.17766	0.17995	0.185	0.18024	0.1822
JER011	0.12265	0.12192	0.12052	0.12353	0.12317	0.12197	0.12018	0.12088	0.1232	0.1222	0.09409	0.09645	0.09335	0.10415	0.09162	0.07584	0.0801	0	0.06925	0.08473	0.15551	0.15394	0.15463	0.15687	0.15565	0.15552	0.15642	0.15523	0.15755	0.155	0.18744	0.18145	0.18041	0.18003	0.18527	0.18095	0.18333	0.18776	0.18449	0.18444
JER014	0.12259	0.12272	0.12026	0.1237	0.12341	0.12304	0.12138	0.12103	0.12314	0.12285	0.09606	0.09755	0.09185	0.10403	0.09173	0.07331	0.07799	0.06925	0	0.08004	0.15453	0.1534	0.15322	0.15544	0.15463	0.15482	0.1555	0.15397	0.15647	0.15363	0.18731	0.18165	0.18004	0.17914	0.18491	0.18014	0.18292	0.18753	0.18311	0.18428
JER015	0.1202	0.11899	0.11764	0.1201	0.11981	0.11946	0.11842	0.11702	0.12105	0.11949	0.09534	0.09889	0.09187	0.10019	0.09059	0.08355	0.07558	0.08473	0.08004	0	0.15148	0.15094	0.1504	0.15332	0.15207	0.15221	0.15394	0.15099	0.15307	0.15116	0.18439	0.17728	0.17676	0.17598	0.18254	0.17681	0.18001	0.18404	0.18031	0.18205
MUT001	0.14953	0.1487	0.14654	0.14965	0.14944	0.1479	0.1479	0.14829	0.15033	0.1486	0.15008	0.15103	0.15105	0.15497	0.14807	0.15592	0.15131	0.15551	0.15453	0.15148	0	0.0674	0.07085	0.0713	0.07039	0.07296	0.07747	0.06981	0.07095	0.07326	0.15018	0.14232	0.14199	0.14152	0.14724	0.14079	0.14524	0.14956	0.14552	0.14623
MUT002	0.14844	0.14738	0.14559	0.1485	0.14806	0.14675	0.14586	0.14711	0.14901	0.14729	0.14791	0.14915	0.14964	0.15433	0.14667	0.15432	0.15081	0.15394	0.1534	0.15094	0.0674	0	0.06983	0.0699	0.07097	0.0726	0.07621	0.07006	0.07094	0.07218	0.1492	0.1421	0.141	0.14071	0.14684	0.14082	0.14518	0.14924	0.14537	0.14515
MUT003	0.14934	0.14804	0.14591	0.14863	0.14883	0.1474	0.14667	0.1473	0.15022	0.14819	0.14869	0.14957	0.15072	0.15374	0.14707	0.15457	0.15066	0.15463	0.15322	0.1504	0.07085	0.06983	0	0.06889	0.05886	0.06298	0.06549	0.06581	0.06751	0.06481	0.15038	0.14228	0.14195	0.14121	0.14739	0.14132	0.14553	0.14985	0.14582	0.14539
MUT004	0.15121	0.14983	0.14808	0.15091	0.1504	0.14927	0.14857	0.1494	0.15146	0.1496	0.1508	0.15181	0.1527	0.15651	0.14949	0.15706	0.15326	0.15687	0.15544	0.15332	0.0713	0.0699	0.06889	0	0.06741	0.0704	0.07205	0.07052	0.0688	0.06541	0.15227	0.14414	0.14343	0.1439	0.14977	0.14317	0.14794	0.15263	0.14885	0.1474
MUT005	0.14953	0.14845	0.14638	0.14914	0.14998	0.14827	0.14724	0.14827	0.15045	0.14918	0.14975	0.15106	0.15121	0.15538	0.14839	0.15635	0.15179	0.15565	0.15463	0.15207	0.07039	0.07097	0.05886	0.06741	0	0.04055	0.07182	0.07001	0.06696	0.0672	0.15159	0.14426	0.14288	0.14256	0.14974	0.14372	0.14751	0.15103	0.1464	0.14766
MUT006	0.14999	0.14834	0.14669	0.14928	0.15014	0.14822	0.14728	0.14825	0.15072	0.14959	0.14973	0.15037	0.15126	0.15498	0.14833	0.15658	0.15197	0.15552	0.15482	0.15221	0.07296	0.0726	0.06298	0.0704	0.04055	0	0.06995	0.07136	0.07111	0.06949	0.15216	0.14501	0.14302	0.14395	0.15029	0.14397	0.14801	0.15167	0.14772	0.14787
MUT007	0.15104	0.14979	0.14807	0.14993	0.15067	0.1482	0.14773	0.1491	0.1508	0.14927	0.15056	0.15189	0.15238	0.15624	0.14897	0.15713	0.1535	0.15642	0.1555	0.15394	0.07747	0.07621	0.06549	0.07205	0.07182	0.06995	0	0.06989	0.07397	0.07506	0.15335	0.1462	0.14426	0.14404	0.15108	0.14438	0.14799	0.15272	0.14896	0.1481
MUT008	0.14936	0.14835	0.14624	0.14939	0.1492	0.14843	0.14771	0.14787	0.14948	0.14867	0.14909	0.15014	0.15093	0.15388	0.14796	0.15493	0.15156	0.15523	0.15397	0.15099	0.06981	0.07006	0.06581	0.07052	0.07001	0.07136	0.06989	0	0.05884	0.07102	0.15125	0.14434	0.14287	0.14291	0.149	0.14241	0.14645	0.15053	0.1476	0.14742
MUT009	0.15059	0.14976	0.14744	0.15112	0.15065	0.15028	0.14881	0.1491	0.15148	0.14993	0.15099	0.15205	0.15261	0.15586	0.14908	0.15734	0.15335	0.15755	0.15647	0.15307	0.07095	0.07094	0.06751	0.0688	0.06696	0.07111	0.07397	0.05884	0	0.06829	0.15208	0.14442	0.143	0.14292	0.14908	0.1437	0.14742	0.1521	0.14739	0.1473
MUT010	0.14887	0.14834	0.14621	0.14879	0.14913	0.14759	0.14665	0.1473	0.14925	0.14814	0.14852	0.15002	0.15065	0.15373	0.14743	0.1549	0.15117	0.155	0.15363	0.15116	0.07326	0.07218	0.06481	0.06541	0.0672	0.06949	0.07506	0.07102	0.06829	0	0.15036	0.14342	0.14183	0.14158	0.14783	0.1417	0.14568	0.15046	0.1463	0.14581
NDM064	0.18169	0.18206	0.18069	0.18264	0.18339	0.18169	0.18106	0.18133	0.18213	0.18182	0.18251	0.1835	0.18443	0.18769	0.18079	0.18821	0.18432	0.18744	0.18731	0.18439	0.15018	0.1492	0.15038	0.15227	0.15159	0.15216	0.15335	0.15125	0.15208	0.15036	0	0.11635	0.12218	0.10182	0.11504	0.12034	0.11837	0.1128	0.1102	0.12287
NDM118	0.17612	0.17476	0.17332	0.17603	0.17589	0.1752	0.17419	0.17444	0.17617	0.17478	0.17583	0.17621	0.17678	0.18089	0.1741	0.18155	0.1779	0.18145	0.18165	0.17728	0.14232	0.1421	0.14228	0.14414	0.14426	0.14501	0.1462	0.14434	0.14442	0.14342	0.11635	0	0.10724	0.10544	0.12668	0.11305	0.12055	0.12362	0.11676	0.13143
NDM131	0.17338	0.174	0.17153	0.1746	0.1745	0.17351	0.17321	0.17307	0.17403	0.17313	0.17528	0.17608	0.17674	0.17984	0.17448	0.18109	0.17707	0.18041	0.18004	0.17676	0.14199	0.141	0.14195	0.14343	0.14288	0.14302	0.14426	0.14287	0.143	0.14183	0.12218	0.10724	0	0.07838	0.10249	0.11307	0.1321	0.13467	0.10417	0.07621
NDM148	0.17377	0.17302	0.17161	0.17375	0.17397	0.17275	0.1725	0.17273	0.17434	0.17343	0.17408	0.17533	0.17578	0.1791	0.17327	0.1803	0.17643	0.18003	0.17914	0.17598	0.14152	0.14071	0.14121	0.1439	0.14256	0.14395	0.14404	0.14291	0.14292	0.14158	0.10182	0.10544	0.07838	0	0.12028	0.10358	0.1306	0.13527	0.0688	0.11001
NDM158	0.17933	0.17979	0.17771	0.18065	0.18	0.1791	0.17881	0.17791	0.18025	0.17918	0.18088	0.18121	0.18204	0.18573	0.17904	0.18542	0.18229	0.18527	0.18491	0.18254	0.14724	0.14684	0.14739	0.14977	0.14974	0.15029	0.15108	0.149	0.14908	0.14783	0.11504	0.12668	0.10249	0.12028	0	0.11534	0.11644	0.1164	0.09286	0.0642
NDM166	0.17555	0.17507	0.17337	0.17585	0.17526	0.17477	0.17431	0.17369	0.17586	0.17426	0.17552	0.17626	0.17661	0.18049	0.17439	0.18113	0.17766	0.18095	0.18014	0.17681	0.14079	0.14082	0.14132	0.14317	0.14372	0.14397	0.14438	0.14241	0.1437	0.1417	0.12034	0.11305	0.11307	0.10358	0.11534	0	0.10261	0.10396	0.10741	0.12833
NDM169	0.17808	0.17752	0.17638	0.17849	0.17886	0.17693	0.17662	0.1762	0.17815	0.17693	0.17741	0.1783	0.17994	0.18306	0.17653	0.18394	0.17995	0.18333	0.18292	0.18001	0.14524	0.14518	0.14553	0.14794	0.14751	0.14801	0.14799	0.14645	0.14742	0.14568	0.11837	0.12055	0.1321	0.1306	0.11644	0.10261	0	0.10194	0.11323	0.13459
NDM183	0.18176	0.18205	0.18048	0.1818	0.18276	0.18127	0.18053	0.18088	0.18321	0.18129	0.18225	0.18266	0.1842	0.18691	0.18089	0.18835	0.185	0.18776	0.18753	0.18404	0.14956	0.14924	0.14985	0.15263	0.15103	0.15167	0.15272	0.15053	0.1521	0.15046	0.1128	0.12362	0.13467	0.13527	0.1164	0.10396	0.10194	0	0.11899	0.13333
NDM719	0.1779	0.17736	0.17636	0.17823	0.17898	0.17751	0.17724	0.17648	0.17843	0.17783	0.17828	0.17909	0.17997	0.18282	0.17704	0.1843	0.18024	0.18449	0.18311	0.18031	0.14552	0.14537	0.14582	0.14885	0.1464	0.14772	0.14896	0.1476	0.14739	0.1463	0.1102	0.11676	0.10417	0.0688	0.09286	0.10741	0.11323	0.11899	0	0.11982
NDM730	0.17814	0.17857	0.17639	0.17947	0.17905	0.1779	0.1778	0.17707	0.17943	0.17802	0.18025	0.18047	0.1813	0.1847	0.17886	0.18487	0.1822	0.18444	0.18428	0.18205	0.14623	0.14515	0.14539	0.1474	0.14766	0.14787	0.1481	0.14742	0.1473	0.14581	0.12287	0.13143	0.07621	0.11001	0.0642	0.12833	0.13459	0.13333	0.11982	0

## Sheet: S4
Supplemenatry Table S4 | List of candidate selection signatures regions and related genes in Muturu based on iHS test
Chr	Start (bp)	End (bp)	size (kb)	-log10(iHS)	Max peak position	Overlaped genes
1	300001	450000	149.999	4.30569	378781	KCNE1,ENSBTAG00000026259,RCAN1
1	82200001	82350000	149.999	4.66896	82271125	ENSBTAG00000029106,TMEM41A,LIPH,SENP2,MAP3K13
1	95100001	95250000	149.999	4.05329	95160610	GPX5,GPX6,ZSCAN23,SPATA16
1	127300001	127450000	149.999	5.39082	127370922	TRPC1,PLS1
2	800001	950000	149.999	4.0051	886599	HERC2,NIPA1
2	29900001	30050000	149.999	4.05324	29952099	SCN7A
2	31300001	31450000	149.999	5.12618	31362675	SLC38A11
2	36400001	36550000	149.999	4.00323	36488180	ENSBTAG00000042933,PLA2R1
2	39300001	39450000	149.999	4.51732	39391047	ACVR1
2	59650001	59850000	199.999	4.31799	59762110	ENSBTAG00000039437,THSD7B
2	59850001	60000000	149.999	4.57054	59928473	THSD7B
2	60450001	60600000	149.999	4.24694	60542125	THSD7B
2	62300001	62450000	149.999	4.35235	62374718	ZRANB3
2	85550001	85700000	149.999	4.71378	85600088	CCDC150
2	107450001	107600000	149.999	4.45727	107529358	WNT6,WNT10A,PRKAG3,CYP27A1
2	119850001	120000000	149.999	4.07485	119929604	ENSBTAG00000043107,B3GNT7,ARMC9
2	121200001	121350000	149.999	4.07715	121299316	A3GALT2,PHC2,ZNF362,TRIM62
2	134850001	135000000	149.999	4.31794	134927017	IGSF21
3	8350001	8500000	149.999	4.60918	8409338	UFC1, NIT1, ENSBTAG00000043232, KLHDC9, ARHGAP30,USF1, TSTD1,USP21, PFDN2, NECTIN4, F11R, DEDD
3	14300001	14450000	149.999	4.27813	14359093	TTC24,ENSBTAG00000021649,IQGAP3,MEF2D
3	52600001	52750000	149.999	4.08331	52672548	BARHL2
3	67600001	67750000	149.999	4.50976	67655132	AK5,PIGK
3	115800001	115950000	149.999	4.3139	115870221	AGAP1
4	3400001	3550000	149.999	4.35922	3463595	RF00322
4	41150001	41300000	149.999	4.14308	41203686	GNAI1
4	52600001	52750000	149.999	4.12368	52676699	TFEC
4	65700001	65850000	149.999	4.10749	65773394	AQP1,ADCYAP1R1,GHRHR
4	66100001	66250000	149.999	4.1523	66171528	GARS,GGCT
4	67600001	67750000	149.999	4.9865	67678869	TRIL,CPVL
4	67750001	67900000	149.999	4.02908	67828002	ENSBTAG00000018909,ENSBTAG00000046308
4	93650001	93800000	149.999	4.1712	93710398	NME2,KCP,TNPO3,IRF5
4	95000001	95150000	149.999	4.34711	95095010	bta-mir-335,CEP41,MEST,COPG2
5	19400001	19550000	149.999	4.16043	19487052	ENSBTAG00000033608,POC1B,ATP2B1
5	21850001	22000000	149.999	4.08325	21922350	RF01164
5	25050001	25200000	149.999	4.09881	25131134	bta-mir-331,RF00100,VEZT
5	27050001	27200000	149.999	4.46806	27112018	TNS2,KRT18,SPRYD3,EIF4B
5	30950001	31100000	149.999	4.15565	31014095	bta-mir-2426,PRKAG1,DDN,WNT1,WNT10B,FKBP11,CCDC65,RND1,KMT2D
5	33100001	33250000	149.999	4.27626	33166657	ENSBTAG00000038027,PCED1B
5	33600001	33750000	149.999	4.22837	33668733	SLC38A4
5	35350001	35500000	149.999	4.14908	35429257	DBX2
5	58750001	58900000	149.999	4.00122	58800753	ENSBTAG00000026030,ENSBTAG00000038521,ENSBTAG00000031111,OR6C76,OR6C75
5	74250001	74400000	149.999	4.38197	74332582	RBFOX2
5	75600001	75750000	149.999	4.70056	75672964	NCF4,CSF2RB
5	82600001	82750000	149.999	4.05511	82658215	ENSBTAG00000002775,PPFIBP1
6	2650001	2800000	149.999	4.25035	2723605	ENSBTAG00000044317,NAF1
6	37900001	38050000	149.999	4.09845	37976380	ENSBTAG00000042830,PKD2,ABCG2
6	38100001	38250000	149.999	4.51163	38157894	SPP1
6	38400001	38600000	199.999	4.41067	38541611	ENSBTAG00000045804,LAP3
6	71800001	71950000	149.999	4.50055	71889319	KIT
6	78950001	79100000	149.999	4.27371	79005436	ADGRL3
6	98800001	98950000	149.999	4.05484	98857898	HNRNPD
6	104550001	104700000	149.999	4.43813	104638624	PPP2R2C,WFS1
7	9000001	9150000	149.999	4.63855	9083458	ENSBTAG00000040305,SYDE1,ENSBTAG00000002686,CASP14,ILVBL,ENSBTAG00000011496
7	9800001	9950000	149.999	4.75578	9898622	ENSBTAG00000046297
7	19550001	19700000	149.999	5.07466	19611547	CAPS,VMAC,NDUFA11,RFX2,RANBP3
7	62850001	63050000	199.999	4.98669	62953681	RF00026,CSNK1A1,ARHGEF37
7	84150001	84300000	149.999	4.62393	84235794	ATG10
8	6600001	6750000	149.999	4.44998	6690427	ENSBTAG00000034948,HPGD
8	112850001	113000000	149.999	4.68373	112938753	RPS7,ENSBTAG00000044847,COLEC11,RNASEH1,ADI1,ALLC,TRAPPC12
9	7800001	7950000	149.999	4.29264	7879066	ENSBTAG00000035855,ADGRB3
9	46700001	46850000	149.999	4.51771	46753418	RF00026
9	56300001	56450000	149.999	4.06898	56354490	ENSBTAG00000033083
9	75500001	75650000	149.999	4.20685	75597903	MAP3K5,MAP7
10	3250001	3400000	149.999	4.27727	3327603	KCNN2
10	15100001	15300000	199.999	4.88864	15200969	ENSBTAG00000044379,ENSBTAG00000045276, ITGA11
10	22650001	22800000	149.999	4.36544	22705890	ENSBTAG00000045758,ENSBTAG00000048302,ENSBTAG00000046464,ENSBTAG00000000432
10	29350001	29500000	149.999	4.26102	29411978	TMCO5B
10	30500001	30650000	149.999	4.04377	30580553	ZNF770,AQR
10	42550001	42700000	149.999	4.59063	42633611	ENSBTAG00000045661,RPL36AL,LRR1
10	50150001	50300000	149.999	4.0152	50239345	FOXB1
10	85550001	85700000	149.999	5.07668	85604553	PTGR2,ZNF410
11	64850001	65000000	149.999	5.19951	64942116	MEIS1
11	68450001	68600000	149.999	5.41926	68527084	C11H2orf42,TIA1,PCYOX1
11	103800001	103950000	149.999	4.06116	103880684	CARD9,SDCCAG3,INPP5E,GPSM1,DNLZ,SNAPC4,PMPCA,SEC16A,CCDC187
11	104150001	104300000	149.999	4.65392	104207736	FAM69B,ENSBTAG00000042482,ENSBTAG00000042930,ENSBTAG00000030281,ENSBTAG00000042565,ABO,SURF6
11	104450001	104600000	149.999	4.63288	104532638	MYMK,FAM163B,ADAMTSL2,DBH,SARDH
11	104600001	104750000	149.999	4.14348	104655646	VAV2,SARDH
12	10900001	11050000	149.999	4.15536	10969837	PCDH8,bta-mir-759
12	72000001	72150000	149.999	4.2032	72081121	ENSBTAG00000045751
12	73750001	73950000	199.999	4.73863	73861894	ENSBTAG00000047764
12	73950001	74300000	349.999	8.1742	74213377	ENSBTAG00000047360, ENSBTAG00000047764
12	74650001	74850000	199.999	4.55398	74754763	ENSBTAG00000023309
12	77900001	78050000	149.999	4.11067	77995339	ENSBTAG00000039065, ENSBTAG00000045566
13	300001	450000	149.999	4.74602	359484	ENSBTAG00000024891, ENSBTAG00000025720
13	1450001	1600000	149.999	4.5541	1526506	PLCB1
13	2950001	3200000	249.999	4.06092	3143331	ANKEF1
13	3350001	3550000	199.999	5.20982	3473070	SNAP25
13	5300001	5450000	149.999	5.88826	5359420	SRY
13	63800001	63950000	149.999	4.38269	63885678	CHMP4B
13	82250001	82400000	149.999	4.1266	82304813	PFDN4,CYP24A1,BCAS1
14	9200001	9350000	149.999	4.02799	9269121	SLA,TG
14	11550001	11700000	149.999	4.38359	11611016	ASAP1
14	27550001	27700000	149.999	4.54313	27603358	CA8
14	35900001	36050000	149.999	4.03141	35953712	PRDM14,NCOA2
14	36750001	36900000	149.999	5.38697	36843468	ENSBTAG00000043212,EYA1
14	49400001	49550000	149.999	4.13762	49465414	AARD
14	56650001	56850000	199.999	4.85974	56764455	ENSBTAG00000044217,ENSBTAG00000021747,KCNV1
14	61500001	61650000	149.999	4.17677	61596629	ENSBTAG00000038276,ZFPM2
14	63250001	63400000	149.999	4.23578	63308926	DCAF13,SLC25A32,CTHRC1,FZD6
14	71350001	71500000	149.999	5.48544	71440194	C8orf37
14	71600001	71750000	149.999	4.42955	71695333	ENSBTAG00000042492,NDUFAF6,TP53INP1
14	76650001	76800000	149.999	4.03294	76734960	MMP16
14	78950001	79100000	149.999	4.35638	79039662	ENSBTAG00000043511,ATP6V0D2
15	46450001	46600000	149.999	4.67284	46517069	ENSBTAG00000047104,ENSBTAG00000045599,ENSBTAG00000043138,ENSBTAG00000032052,OR6A2,ENSBTAG00000032050,OR10A4,ENSBTAG00000026441
16	22300001	22450000	149.999	4.62594	22369939	RRP15
16	27500001	27650000	149.999	4.29503	27572430	CCDC185,SUSD4
16	48050001	48200000	149.999	4.00734	48104428	CHD5,KCNAB2,NPHP4
16	64700001	64850000	149.999	4.03229	64756649	ENSBTAG00000027426
16	76950001	77100000	149.999	4.9039	77007798	PLXNA2
16	77200001	77350000	149.999	4.90573	77251240	PLXNA2
17	35800001	35950000	149.999	5.97032	35892627	ENSBTAG00000045738, ENSBTAG00000045938
17	37400001	37550000	149.999	4.08716	37450879	ENSBTAG00000046833
17	50700001	50850000	149.999	4.13856	50794266	ENSBTAG00000046439
17	53950001	54100000	149.999	4.45752	54019660	ZNF664,CCDC92,DNAH10
18	45300001	45450000	149.999	4.49533	45399027	ENSBTAG00000045737,ENSBTAG00000045778,ENSBTAG00000047571
19	11750001	11900000	149.999	4.04028	11832313	TBX4
19	41650001	41800000	149.999	4.13544	41739593	ENSBTAG00000046458,ENSBTAG00000043117,KRT28,KRT10,KRT12,KRT20,KRT23
19	54600001	54750000	149.999	4.94676	54674551	SYNGR2,bta-mir-2348,TK1,TMC8,TNRC6C,TMC6
19	59400001	59550000	149.999	4.0145	59469417	ENSBTAG00000045824
19	60450001	60600000	149.999	4.86529	60536854	ENSBTAG00000043304
20	5650001	5800000	149.999	4.90693	5745606	NSG2
20	29200001	29350000	149.999	4.07052	29298343	HCN1
20	31950001	32100000	149.999	4.2483	32012867	GHR
20	32900001	33050000	149.999	4.49253	32983883	PLCXD3
20	62100001	62250000	149.999	4.60936	62191144	CTNND2
20	64500001	64650000	149.999	4.46432	64589089	ENSBTAG00000044785
21	9550001	9700000	149.999	4.59598	9611318	ENSBTAG00000046611
21	30600001	30750000	149.999	4.17914	30694895	OTUD7A
21	46850001	47000000	149.999	4.64783	46936427	MBIP
22	13800001	13950000	149.999	4.9168	13882308	CTNNB1
22	18600001	18750000	149.999	5.23897	18656106	GRM7
22	39900001	40050000	149.999	4.06182	39996252	PTPRG
22	49450001	49600000	149.999	4.42955	49501682	RPL29,ABHD14B,GPR62,PARP3,IQCF1,IQCF5,IQCF2,IQCF3,ACY1,PCBP4,RRP9
23	4050001	4200000	149.999	5.06448	4117988	ENSBTAG00000046193, ENSBTAG00000033515
23	9400001	9550000	149.999	4.17381	9478267	ENSBTAG00000038094,TEAD3,FKBP5,TULP1
23	12450001	12600000	149.999	4.7804	12518040	GLO1,BTBD9,DNAH8
23	25050001	25200000	149.999	4.13128	25134701	ENSBTAG00000032624,GCM1,FBXO9,ELOVL5
23	25200001	25550000	349.999	5.00399	25472379	ENSBTAG00000045034,BOLA-DQA2,ENSBTAG00000003352,BOLA-DQB,BOLA-DQA5,BOLA-DRB3,ENSBTAG00000037605,ELOVL5
23	25700001	26200000	499.999	6.02473	26131937	BLA-DQB,ENSBTAG00000033979
23	26200001	26400000	199.999	9.68806	26303925	ENSBTAG00000026163
23	26650001	27050000	399.999	7.03195	26977389	ENSBTAG00000046920,PBX2,AGER,RNF5,EGFL8,PRRT1,ENSBTAG00000046116,ENSBTAG00000023563,ENSBTAG00000048304,NOTCH4,AGPAT1,PPT2,ENSBTAG00000023541
23	28400001	28650000	249.999	5.65753	28550028	JSP.1,BOLA,ENSBTAG00000037421,ENSBTAG00000044550,TRIM10,TRIM40,TRIM15,TRIM26
23	29150001	29400000	249.999	5.5023	29300742	OR12D3, ENSBTAG00000039901, OR5V1, ENSBTAG00000013654, ENSBTAG00000031843, ENSBTAG00000039534, ENSBTAG00000046777, ENSBTAG00000047086, ENSBTAG00000046023, ENSBTAG00000038608, ENSBTAG00000037628, ENSBTAG00000031850, ENSBTAG00000000228
23	29400001	29650000	249.999	5.26813	29554563	ENSBTAG00000006339,ENSBTAG00000027279,ENSBTAG00000027955,ENSBTAG00000040582,ENSBTAG00000047558,ENSBTAG00000040280,ENSBTAG00000038562,ENSBTAG00000038928,ENSBTAG00000038444,ENSBTAG00000039052,ENSBTAG00000040064,ENSBTAG00000040187,ENSBTAG00000037577,ENSBTAG00000047736
23	33000001	33250000	249.999	4.88033	33190746	ENSBTAG00000042587,ENSBTAG00000043143,MRS2,GPLD1,DCDC2
24	150001	300000	149.999	4.03961	205808	ENSBTAG00000013809,ENSBTAG00000046382
24	28800001	28950000	149.999	5.45738	28850620	ENSBTAG00000028575
24	33150001	33400000	249.999	4.74631	33315585	ENSBTAG00000039850,ENSBTAG00000043389,ANKRD29,LAMA3
24	33850001	34000000	149.999	4.00565	33905828	bta-mir-2284y-4,RBBP8
24	51300001	51450000	149.999	4.967	51393102	ENSBTAG00000045085
25	38700001	38850000	149.999	4.07086	38798505	ENSBTAG00000046517,RAC1,DAGLB
26	10550001	10700000	149.999	4.08405	10642075	ENSBTAG00000037328,ANKRD22,ACTA2,STAMBPL1
26	10700001	10900000	199.999	4.88408	10814117	ACTA2,FAS
26	11450001	11600000	149.999	5.94569	11538491	KIF20B
26	18000001	18150000	149.999	4.65909	18064193	ENSBTAG00000046239,SLIT1,LCOR
26	31300001	31450000	149.999	4.05594	31383613	bta-mir-2394,DUSP5,SMC3
27	5700001	5850000	149.999	4.47259	5773995	ENSBTAG00000010248,DEFB1
27	26000001	26150000	149.999	4.17425	26070638	PPP2CB,TEX15
27	34700001	34850000	149.999	4.16882	34775794	IDO2
28	350001	500000	149.999	4.00035	420589	ACTA1,NUP133,ABCB10
28	1550001	1700000	149.999	4.48638	1640473	ENSBTAG00000048153
28	1700001	1850000	149.999	4.6199	1781026	ENSBTAG00000048153
28	3950001	4100000	149.999	5.17291	4013039	ENSBTAG00000045932,ENSBTAG00000039845
28	8750001	8900000	149.999	4.00323	8806688	NID1,GPR137B
28	12750001	12900000	149.999	4.73734	12826465	CHRM3
28	18450001	18650000	199.999	4.57002	18550154	RTKN2,ZNF365
29	22850001	23000000	149.999	4.03462	22913216	ANO5
29	27400001	27550000	149.999	4.12147	27462454	ENSBTAG00000039964, ENSBTAG00000040239
29	27650001	27800000	149.999	5.1393	27739031	ENSBTAG00000017495,ENSBTAG00000046665,ENSBTAG00000037623,ENSBTAG00000040250
Gene Desert Regions (GDR)
1	13650001	13850000	199.999	4.45075	13765448
1	29250001	29400000	149.999	4.05463	29306920
1	32900001	33050000	149.999	4.27617	32990628
1	62550001	62700000	149.999	4.01338	62640844
1	124600001	124750000	149.999	4.46535	124675276
1	141500001	141650000	149.999	4.3343	141551913
1	150450001	150600000	149.999	4.09019	150534507
1	157800001	157950000	149.999	4.65904	157860334
2	47150001	47300000	149.999	4.3974	47224034
2	50650001	50800000	149.999	4.00375	50719842
2	54200001	54350000	149.999	5.14329	54274621
2	57250001	57400000	149.999	4.08408	57321565
2	59500001	59650000	149.999	4.46413	59578547
2	61150001	61300000	149.999	4.03587	61212653
2	64200001	64350000	149.999	4.19616	64262954
2	76600001	76750000	149.999	4.61308	76654541
2	79450001	79600000	149.999	5.54313	79518006
2	82150001	82300000	149.999	4.01933	82247146
3	37750001	37900000	149.999	4.01159	37829544
3	61000001	61150000	149.999	4.50513	61065906
3	62250001	62450000	199.999	5.34197	62364126
3	71700001	71850000	149.999	4.11979	71771016
3	114800001	115000000	199.999	4.80853	114914862
4	41950001	42100000	149.999	4.01943	42035418
5	19100001	19250000	149.999	4.64644	19171120
5	23800001	23950000	149.999	4.43486	23866855
5	72950001	73200000	249.999	4.93518	73109263
5	73250001	73400000	149.999	4.6708	73336935
5	87400001	87550000	149.999	4.54036	87488993
5	117250001	117500000	249.999	4.51841	117442226
6	32500001	32650000	149.999	4.11675	32559594
6	39500001	39650000	149.999	4.21528	39551324
7	37750001	37900000	149.999	4.34513	37847624
7	78250001	78400000	149.999	4.37762	78306479
7	80850001	81000000	149.999	5.19151	80933154
7	109450001	109600000	149.999	5.00607	109517452
8	20500001	20650000	149.999	4.16079	20567891
8	43250001	43400000	149.999	4.56167	43336287
8	50600001	50750000	149.999	4.00003	50689914
9	2850001	3000000	149.999	4.19835	2913132
9	7650001	7800000	149.999	4.03996	7749851
9	29300001	29450000	149.999	4.08686	29371428
9	57300001	57450000	149.999	4.2919	57371298
9	63800001	64050000	249.999	4.68292	63987204
9	87000001	87150000	149.999	5.04365	87080247
10	33350001	33500000	149.999	4.026	33442421
10	35150001	35300000	149.999	4.85861	35223595
10	90300001	90450000	149.999	4.0203	90378396
11	33550001	33700000	149.999	4.32736	33614796
11	39100001	39250000	149.999	4.13589	39191629
11	41850001	42000000	149.999	4.08186	41948519
11	42600001	42750000	149.999	4.08829	42697675
11	53950001	54100000	149.999	4.19655	54009160
11	56200001	56350000	149.999	4.65151	56250386
11	59200001	59350000	149.999	4.99574	59255329
12	9600001	9800000	199.999	5.42708	9729747
12	71200001	71450000	249.999	4.0731	71388830
12	71450001	71600000	149.999	4.1719	71524012
12	73400001	73550000	149.999	4.62404	73483538
12	75150001	75300000	149.999	4.98913	75203201
12	75950001	76300000	349.999	6.42382	76223675
12	76500001	76650000	149.999	4.15504	76564023
13	9500001	9650000	149.999	4.56472	9550884
13	82850001	83000000	149.999	4.22764	82930801
14	4900001	5050000	149.999	4.02303	4977451
14	31300001	31450000	149.999	4.23651	31353784
14	32350001	32500000	149.999	4.64023	32440981
14	56250001	56400000	149.999	4.17695	56349961
14	60500001	60700000	199.999	4.89138	60601962
15	59850001	60000000	149.999	4.02018	59939365
15	60250001	60400000	149.999	4.90856	60320032
15	70250001	70400000	149.999	4.18036	70328151
15	71700001	71850000	149.999	4.55332	71766601
16	7600001	7750000	149.999	4.14803	7678901
16	8000001	8150000	149.999	4.07439	8089171
16	8450001	8600000	149.999	4.56262	8539516
16	13950001	14100000	149.999	4.18022	14043067
16	48850001	49000000	149.999	4.92055	48908622
17	51950001	52100000	149.999	4.7575	52013320
18	20850001	21000000	149.999	4.0473	20906665
18	31750001	31900000	149.999	4.80185	31844659
19	59200001	59350000	149.999	4.11178	59267208
20	6850001	7000000	149.999	4.51197	6917421
20	43300001	43500000	199.999	4.57091	43411218
21	12500001	12650000	149.999	4.65724	12574746
21	36150001	36300000	149.999	4.1921	36209444
21	36650001	36800000	149.999	4.14274	36743888
21	39100001	39250000	149.999	4.09712	39176832
22	12850001	13000000	149.999	4.04465	12918189
26	3600001	3750000	149.999	4.34432	3678808
26	3800001	3950000	149.999	4.09	3863748
26	18200001	18350000	149.999	4.39941	18278771
27	2750001	2900000	149.999	4.14496	2820755
28	20400001	20650000	249.999	4.60053	20561635
28	32400001	32550000	149.999	4.21472	32460746
29	21550001	21700000	149.999	4.45167	21616916
29	31650001	31800000	149.999	5.11089	31714663

## Sheet: S5
Supplemenatry Table S5 | List of candidate selection signatures regions and related genes in Muturu based on Rsb test
Chr	Start (bp)	End (bp)	size (kb)	Rsb	Overlaped genes
1	300001	450000	149.999	2.86586	KCNE1, RCAN1
1	100750001	100900000	149.999	3.36195	WDR49, SERPINI2, ZBBX
1	101000001	101200000	199.999	3.32696	ZBBX
1	126550001	126650000	99.999	3.21316	SLC9A9
1	144400001	144550000	149.999	3.13242	SLC37A1, PDE9A
1	150350001	150500000	149.999	3.15303	CLDN14, CHAF1B
2	22650001	22800000	149.999	3.48504	OLA1
2	63750001	63850000	99.999	2.93828	RF00619
2	79700001	80150000	449.999	3.21541	GLS, STAT1
2	134900001	135000000	99.999	3.10782	IGSF21
3	26950001	27050000	99.999	2.85599	ATP1A1
3	67600001	68000000	399.999	3.46735	AK5, PIGK, ST6GALNAC5
3	73250001	73400000	149.999	2.89972	ENSBTAG00000005099
3	114150001	114250000	99.999	2.93212	TRPM8
3	118200001	118300000	99.999	2.93521	PER2, TRAF3IP1
4	45500001	45700000	199.999	2.85416	ORC5
4	52650001	53100000	449.999	3.65791	RF00026, TFEC
4	53900001	54050000	149.999	3.13703	RF00015
4	68650001	68750000	99.999	3.307	JAZF1
5	4700001	4850000	149.999	2.84624	CAPS2, GLIPR1L1
5	10500001	10700000	199.999	3.04848	LIN7A
5	111300001	111400000	99.999	2.81695	SYNGR1, TAB1
6	86650001	86900000	249.999	3.36777	, UGT2A1
6	115750001	116050000	299.999	3.27094	FGFBP1, RF00026, CD38, PROM1
7	41100001	41250000	149.999	2.98169	RF00100, PROP1, RF00001, CLK4, ZNF354A
7	59700001	59800000	99.999	2.83835	PPP2R2B
7	90800001	90950000	149.999	3.00914	ENSBTAG00000003258
8	50950001	51050000	99.999	2.84998	RF00493, RORB
8	63050001	63200000	149.999	2.80394	TDRD7, TMOD1
8	63650001	63850000	199.999	2.93882	NANS, TRIM14, CORO2A, TBC1D2, GABBR2
8	66400001	66550000	149.999	2.90611	RF00100,
8	74850001	75300000	449.999	3.45552	PNMA2, RF00001, BNIP3L, ADRA1A, PPP2R2A, DPYSL2
8	102700001	102800000	99.999	3.03365	GNG10, C9orf84, DNAJC25
8	102900001	103000000	99.999	2.82565	UGCG
8	112800001	113000000	199.999	3.02054	RPS7, RF01210, DCDC2C, COLEC11, RNASEH1, ADI1, ALLC, TRAPPC12
9	56200001	56350000	149.999	2.86974	ENSBTAG00000033083
9	102800001	102900000	99.999	2.67482	SFT2D1, MPC1
9	102900001	103050000	149.999	2.96167	RPS6KA2
11	53800001	53900000	99.999	2.70226	RF00017
11	64500001	64600000	99.999	2.90771	RF00001
11	94500001	94600000	99.999	2.87385	RF00402, CRB2, DENND1A
11	94600001	94850000	249.999	2.94852	DENND1A
11	102900001	103150000	249.999	3.56385	GFI1B, SPACA9, GTF3C5, CEL, RALGDS, AK8, TSC1
11	104100001	104250000	149.999	2.95642	EGFL7, bta-mir-126, FAM69B, RF00560, RF00560, RF00026, AGPAT2, ABO
12	19150001	19250000	99.999	2.69862	PHF11, RCBTB1
12	20550001	21100000	549.999	3.95211	SERPINE3, FAM124A, WDFY2, INTS6
13	19700001	19950000	249.999	3.16042	NRP1
13	42350001	42500000	149.999	3.21592	NXT1, GZF1, CSTL1, CST11, NAPB, MGC133636
14	56050001	56150000	99.999	2.73424	RF00020
14	71450001	71600000	149.999	2.94337	PLEKHF2
14	74500001	74900000	399.999	3.15686	RUNX1T1
15	81150001	81250000	99.999	2.79399	ENSBTAG00000039801, ENSBTAG00000036131, ENSBTAG00000040463
16	27400001	27600000	199.999	2.88607	CCDC185, SUSD4
16	27600001	27700000	99.999	2.82066	CAPN8
16	77200001	77450000	249.999	3.20712	CD34, PLXNA2
17	35100001	35250000	149.999	2.75051	RF00015, NUDT6, SPATA5, FGF2
17	47300001	47450000	149.999	3.00227	STX2
17	51200001	51300000	99.999	2.89143	ENSBTAG00000047597, ENSBTAG00000033558
17	71700001	71900000	199.999	3.11721	SLC35E4, DUSP18, C17H5orf52, TCN2, PES1, OSBP2
19	27250001	27450000	199.999	3.13774	CXCL16, MED11, ARRB2, bta-mir-2338, ALOX15, ALOX12E, RNASEK, C19H17orf49, bta-mir-497, bta-mir-195, BCL6B, PELP1, ALOX12
19	28200001	28350000	149.999	3.10737	KCNAB3, TRAPPC1, ALOX12B, CHD3, CNTROB, GUCY2D, ALOX15B
19	53600001	53700000	99.999	2.74925	RBFOX3
20	5200001	5350000	149.999	2.84548	BOD1
20	16850001	16950000	99.999	2.69737	IPO11
20	32650001	32750000	99.999	2.96869	C5orf51, OXCT1
21	4450001	4550000	99.999	2.80738	GABRA5
21	47750001	47850000	99.999	2.91562	SLC25A21
21	54650001	54900000	249.999	3.22958	FSCB
23	4500001	4600000	99.999	2.88648	BMP5
23	20100001	20250000	149.999	2.75754	ADGRF1, ADGRF5
23	32700001	32950000	249.999	2.84122	RF00026, ACOT13, RIPOR2, GMNN, C23H6orf62, TDP2, KIAA0319
24	19850001	20000000	149.999	2.96258	CELF4
24	33250001	33500000	249.999	3.51892	ANKRD29, NPC1, RMC1, LAMA3
24	39400001	39500000	99.999	2.76253	EPB41L3
25	18950001	19050000	99.999	2.84333	DNAH3
25	33600001	33750000	149.999	2.95389	RF00421, CLIP2, LAT2, EIF4H, RFC2
26	11450001	11800000	349.999	3.76716	KIF20B
27	28450001	29000000	549.999	3.90313	RNF122, DUSP26
28	250001	400000	149.999	3.03334	CCSAP
28	26300001	26400000	99.999	2.82909	COL13A1
29	19000001	19150000	149.999	3.07048	ENSBTAG00000034536
Gene Desert Regions (GDR)
1	101700001	101800000	99.999	3.03849
1	101850001	102050000	199.999	3.05222
1	120850001	120950000	99.999	2.91603
1	124900001	125000000	99.999	2.72769
1	145300001	145450000	149.999	3.63407
2	1500001	1600000	99.999	2.7181
2	22900001	23000000	99.999	2.88393
2	64050001	64200000	149.999	3.16059
2	64200001	64450000	249.999	2.94911
2	79450001	79550000	99.999	2.83289
3	62200001	62500000	299.999	3.54983
4	3350001	3450000	99.999	2.71655
4	54300001	54650000	349.999	3.16683
4	55200001	55350000	149.999	2.93558
4	83750001	84500000	749.999	3.73516
4	91300001	91400000	99.999	2.80481
4	108250001	108350000	99.999	2.77682
6	63850001	63950000	99.999	3.19318
6	74250001	74400000	149.999	3.07058
6	74500001	74700000	199.999	2.93306
6	74750001	74900000	149.999	2.97893
6	77200001	77350000	149.999	2.83809
6	98600001	98800000	199.999	3.10672
7	40850001	40950000	99.999	2.81862
7	87150001	87250000	99.999	2.81245
7	105850001	105950000	99.999	2.83251
8	56700001	56800000	99.999	3.08399
8	57400001	57500000	99.999	2.79684
8	58850001	59000000	149.999	2.82089
8	74450001	74800000	349.999	3.88024
9	56100001	56200000	99.999	2.77587
9	100600001	100700000	99.999	2.82451
11	53950001	54050000	99.999	2.79444
11	77750001	77900000	149.999	2.941
12	17500001	17600000	99.999	2.70333
12	19750001	20050000	299.999	3.23522
12	30400001	30500000	99.999	2.98843
12	70750001	70850000	99.999	2.75641
13	48700001	48800000	99.999	2.87014
13	48800001	48900000	99.999	2.76319
13	48900001	49050000	149.999	2.95637
13	49050001	49150000	99.999	2.96312
14	55800001	55900000	99.999	2.7442
14	74900001	75000000	99.999	2.9294
14	77450001	77550000	99.999	2.70475
15	11750001	11850000	99.999	2.86196
15	23650001	23750000	99.999	2.79386
16	8650001	8750000	99.999	2.71805
16	17950001	18050000	99.999	2.70721
16	23200001	23300000	99.999	2.69814
17	9050001	9350000	299.999	2.97496
18	27850001	27950000	99.999	2.83222
18	32450001	32550000	99.999	2.82784
19	4300001	4400000	99.999	2.83355
19	8500001	8650000	149.999	2.81666
20	32850001	32950000	99.999	3.73678
20	57650001	57750000	99.999	2.72167
20	65850001	65950000	99.999	2.73785
21	55000001	55150000	149.999	3.07097
22	36350001	36450000	99.999	2.85549
26	3450001	3750000	299.999	3.0405
28	20000001	20100000	99.999	2.745
28	20400001	20700000	299.999	3.16978
29	30250001	30350000	99.999	3.78948

## Sheet: S6
Supplemenatry Table S6 | List of candidate selection signatures regions and related genes in N'Dama based on iHS test
Chr	Gene start (bp)	Gene end (bp)	Gene name	Gene stable ID	Gene description
1	5745203	5915273	GRIK1	ENSBTAG00000034854	glutamate ionotropic receptor kainate type subunit 1 [Source:HGNC Symbol;Acc:HGNC:4579]
1	5891441	5891949	ENSBTAG00000045873	ENSBTAG00000045873
1	54140526	54305154	MORC1	ENSBTAG00000015475	MORC family CW-type zinc finger 1 [Source:VGNC Symbol;Acc:VGNC:31554]
1	54481399	54490989	DPPA2	ENSBTAG00000020460	developmental pluripotency-associated protein 2 [Source:RefSeq peptide;Acc:NP_001193399]
1	54509507	54516574	DPPA4	ENSBTAG00000038103	developmental pluripotency-associated protein 4 [Source:RefSeq peptide;Acc:NP_001193410]
1	54654216	54654795	ENSBTAG00000000609	ENSBTAG00000000609
1	66213612	66537723	STXBP5L	ENSBTAG00000001918	syntaxin binding protein 5 like [Source:VGNC Symbol;Acc:VGNC:35449]
1	66900639	66956302	EAF2	ENSBTAG00000013070	ELL associated factor 2 [Source:VGNC Symbol;Acc:VGNC:28295]
1	66968007	67009449	SLC15A2	ENSBTAG00000033166	solute carrier family 15 member 2 [Source:HGNC Symbol;Acc:HGNC:10921]
1	67036691	67046927	ENSBTAG00000001442	ENSBTAG00000001442
1	67082115	67116669	ILDR1	ENSBTAG00000004705	immunoglobulin like domain containing receptor 1 [Source:VGNC Symbol;Acc:VGNC:30173]
1	67664799	67720894	HSPBAP1	ENSBTAG00000005066	HSPB1 associated protein 1 [Source:VGNC Symbol;Acc:VGNC:29987]
1	67722242	67810789	DIRC2	ENSBTAG00000005071	disrupted in renal carcinoma 2 [Source:HGNC Symbol;Acc:HGNC:16628]
1	67840125	67878028	SEMA5B	ENSBTAG00000018765	semaphorin 5B [Source:VGNC Symbol;Acc:VGNC:34440]
1	69935163	69961881	MUC13	ENSBTAG00000010382	mucin 13, cell surface associated [Source:VGNC Symbol;Acc:VGNC:31758]
1	70027330	70106415	HEG1	ENSBTAG00000021396	heart development protein with EGF like domains 1 [Source:VGNC Symbol;Acc:VGNC:29803]
1	70573620	70664027	OSBPL11	ENSBTAG00000006471	oxysterol binding protein like 11 [Source:VGNC Symbol;Acc:VGNC:32459]
1	70742636	70784188	LMLN	ENSBTAG00000044172	leishmanolysin like peptidase [Source:VGNC Symbol;Acc:VGNC:30928]
1	70788697	70792140	RPL35A	ENSBTAG00000014208	60S ribosomal protein L35a [Source:UniProtKB/Swiss-Prot;Acc:Q56JY1]
1	70792452	70838105	IQCG	ENSBTAG00000018025	IQ motif containing G [Source:VGNC Symbol;Acc:VGNC:30256]
1	70845570	70947214	LRCH3	ENSBTAG00000032839	leucine rich repeats and calponin homology domain containing 3 [Source:VGNC Symbol;Acc:VGNC:30973]
1	70954511	70984201	FYTTD1	ENSBTAG00000014874	forty-two-three domain containing 1 [Source:VGNC Symbol;Acc:VGNC:29164]
1	70996327	71044754	RUBCN	ENSBTAG00000001890	RUN and cysteine rich domain containing beclin 1 interacting protein [Source:VGNC Symbol;Acc:VGNC:34212]
1	75220593	75222153	MB21D2	ENSBTAG00000005430	Mab-21 domain containing 2 [Source:VGNC Symbol;Acc:VGNC:31272]
1	81992398	82161528	IGF2BP2	ENSBTAG00000007666	insulin like growth factor 2 mRNA binding protein 2 [Source:VGNC Symbol;Acc:VGNC:30080]
1	82176394	82210749	SENP2	ENSBTAG00000001749	SUMO1/sentrin/SMT3 specific peptidase 2 [Source:VGNC Symbol;Acc:VGNC:34446]
1	82243015	82278080	LIPH	ENSBTAG00000001535	lipase H [Source:VGNC Symbol;Acc:VGNC:30905]
1	82285913	82294596	TMEM41A	ENSBTAG00000017115	transmembrane protein 41A [Source:VGNC Symbol;Acc:VGNC:36085]
1	82301321	82426795	MAP3K13	ENSBTAG00000017103	mitogen-activated protein kinase kinase kinase 13 [Source:VGNC Symbol;Acc:VGNC:31191]
1	105901476	105902305	ENSBTAG00000011051	ENSBTAG00000011051
1	139678041	139842029	ENSBTAG00000010448	ENSBTAG00000010448
1	54649606	54650250	ENSBTAG00000022275	ENSBTAG00000022275
1	70697540	70698145	ENSBTAG00000003383	ENSBTAG00000003383
1	54406683	54406783	ENSBTAG00000044520	ENSBTAG00000044520
1	70869304	70869383	ENSBTAG00000043376	ENSBTAG00000043376
1	70869064	70869135	ENSBTAG00000042610	ENSBTAG00000042610
1	70786714	70786824	ENSBTAG00000045455	ENSBTAG00000045455
1	82250680	82250794	ENSBTAG00000029106	ENSBTAG00000029106
2	5512932	5514784	ENSBTAG00000017214	ENSBTAG00000017214
2	5567018	5603683	NAB1	ENSBTAG00000000266	NGFI-A binding protein 1 [Source:VGNC Symbol;Acc:VGNC:31857]
2	53065587	53732838	ARHGAP15	ENSBTAG00000032289	Rho GTPase activating protein 15 [Source:VGNC Symbol;Acc:VGNC:26076]
2	69859799	69874876	ENSBTAG00000015077	ENSBTAG00000015077
2	69899473	69917270	ENSBTAG00000016785	ENSBTAG00000016785
2	69928655	70029514	CCDC93	ENSBTAG00000010221	coiled-coil domain containing 93 [Source:VGNC Symbol;Acc:VGNC:26934]
2	72166550	72332969	EPB41L5	ENSBTAG00000018236	erythrocyte membrane protein band 4.1 like 5 [Source:VGNC Symbol;Acc:VGNC:28525]
2	72358249	72430777	RALB	ENSBTAG00000032021	RAS like proto-oncogene B [Source:VGNC Symbol;Acc:VGNC:33699]
2	86718341	87086748	PLCL1	ENSBTAG00000007635	phospholipase C like 1 (inactive) [Source:HGNC Symbol;Acc:HGNC:9063]
2	90214945	90219273	ENSBTAG00000003731	ENSBTAG00000003731
2	90278155	90301820	CASP8	ENSBTAG00000015718	caspase 8 [Source:VGNC Symbol;Acc:VGNC:26784]
2	90302815	90340658	ALS2CR12	ENSBTAG00000012334	amyotrophic lateral sclerosis 2 chromosome region 12 [Source:HGNC Symbol;Acc:HGNC:14439]
2	95475474	95499166	MDH1B	ENSBTAG00000016192	malate dehydrogenase 1B [Source:VGNC Symbol;Acc:VGNC:31334]
2	95499478	95519762	FASTKD2	ENSBTAG00000016193	FAST kinase domains 2 [Source:VGNC Symbol;Acc:VGNC:28874]
2	97098843	97182875	PTH2R	ENSBTAG00000011992	parathyroid hormone 2 receptor [Source:VGNC Symbol;Acc:VGNC:33516]
2	99660620	99997642	ENSBTAG00000012647	ENSBTAG00000012647
2	99704435	99714269	ENSBTAG00000047490	ENSBTAG00000047490
2	103520024	103720887	ABCA12	ENSBTAG00000003472	ATP binding cassette subfamily A member 12 [Source:VGNC Symbol;Acc:VGNC:25456]
2	103847180	103870755	ATIC	ENSBTAG00000019274	5-aminoimidazole-4-carboxamide ribonucleotide formyltransferase/IMP cyclohydrolase [Source:VGNC Symbol;Acc:VGNC:26264]
2	103881402	103950562	FN1	ENSBTAG00000008300	fibronectin 1 [Source:VGNC Symbol;Acc:VGNC:29056]
2	116759408	116762490	CCL20	ENSBTAG00000021326	C-C motif chemokine ligand 20 [Source:VGNC Symbol;Acc:VGNC:26947]
2	123392015	123401324	MATN1	ENSBTAG00000003479	matrilin 1, cartilage matrix protein [Source:VGNC Symbol;Acc:VGNC:31264]
2	129501943	129502611	ENSBTAG00000048024	ENSBTAG00000048024
2	129522680	129534734	SRSF10	ENSBTAG00000008072	serine and arginine rich splicing factor 10 [Source:VGNC Symbol;Acc:VGNC:35298]
2	129536933	129540976	PNRC2	ENSBTAG00000030435	proline rich nuclear receptor coactivator 2 [Source:VGNC Symbol;Acc:VGNC:33099]
2	129597586	129634311	CNR2	ENSBTAG00000019371	cannabinoid receptor 2 [Source:VGNC Symbol;Acc:VGNC:27530]
2	72355937	72358049	TMEM185B	ENSBTAG00000026829	transmembrane protein 185B [Source:VGNC Symbol;Acc:VGNC:36012]
2	87546864	87546968	ENSBTAG00000044781	ENSBTAG00000044781
2	54543159	54543270	ENSBTAG00000043666	ENSBTAG00000043666
2	69856395	69856501	ENSBTAG00000042265	ENSBTAG00000042265
3	65200088	65200398	ENSBTAG00000011537	ENSBTAG00000011537
3	66795567	66895377	GIPC2	ENSBTAG00000011733	GIPC PDZ domain containing family member 2 [Source:VGNC Symbol;Acc:VGNC:29366]
3	67687802	67824632	PIGK	ENSBTAG00000031012	phosphatidylinositol glycan anchor biosynthesis class K [Source:VGNC Symbol;Acc:VGNC:32870]
3	67863093	68073051	ST6GALNAC5	ENSBTAG00000007309	ST6 N-acetylgalactosaminide alpha-2,6-sialyltransferase 5 [Source:VGNC Symbol;Acc:VGNC:35341]
3	99806666	99820784	CYP4A11	ENSBTAG00000037890	cytochrome P450, family 4, subfamily A, polypeptide 11 [Source:RefSeq peptide;Acc:NP_001071376]
3	99840657	99849477	ENSBTAG00000000229	ENSBTAG00000000229
3	99918428	99933505	CYP4A22	ENSBTAG00000013481	cytochrome P450, family 4, subfamily A, polypeptide 22 [Source:RefSeq peptide;Acc:NP_001092460]
3	99937185	99957408	CYP4B1	ENSBTAG00000011976	cytochrome P450 4B1 [Source:RefSeq peptide;Acc:NP_001069670]
3	107180352	107389223	MACF1	ENSBTAG00000021024	microtubule-actin cross-linking factor 1 [Source:RefSeq peptide;Acc:NP_001137332]
3	107513772	107515427	ENSBTAG00000047038	ENSBTAG00000047038
3	110260238	110275243	TRAPPC3	ENSBTAG00000005732	trafficking protein particle complex 3 [Source:VGNC Symbol;Acc:VGNC:36288]
3	110299484	110302198	COL8A2	ENSBTAG00000010175	collagen type VIII alpha 2 chain [Source:VGNC Symbol;Acc:VGNC:27575]
3	110305531	110311199	ADPRHL2	ENSBTAG00000021715	ADP-ribosylhydrolase like 2 [Source:VGNC Symbol;Acc:VGNC:25691]
3	110312376	110316779	TEKT2	ENSBTAG00000021714	tektin 2 [Source:VGNC Symbol;Acc:VGNC:35737]
3	110338488	110456098	AGO3	ENSBTAG00000018324	argonaute 3, RISC catalytic component [Source:HGNC Symbol;Acc:HGNC:18421]
3	110530154	110558237	AGO4	ENSBTAG00000015220	argonaute 4, RISC catalytic component [Source:VGNC Symbol;Acc:VGNC:25733]
3	110604436	110630769	CLSPN	ENSBTAG00000002826	claspin [Source:VGNC Symbol;Acc:VGNC:27465]
3	110720283	110756534	PSMB2	ENSBTAG00000002377	proteasome subunit beta 2 [Source:VGNC Symbol;Acc:VGNC:33446]
3	110762359	110777361	TFAP2E	ENSBTAG00000001959	transcription factor AP-2 epsilon [Source:VGNC Symbol;Acc:VGNC:35780]
3	110784500	110793268	NCDN	ENSBTAG00000016696	neurochondrin [Source:VGNC Symbol;Acc:VGNC:31910]
3	110799992	110800501	ENSBTAG00000024088	ENSBTAG00000024088
3	110829674	110889859	KIAA0319L	ENSBTAG00000016694	KIAA0319 like [Source:VGNC Symbol;Acc:VGNC:30549]
3	110912671	110988583	ZMYM4	ENSBTAG00000021023	zinc finger MYM-type containing 4 [Source:VGNC Symbol;Acc:VGNC:37200]
3	111493039	111498704	GJB3	ENSBTAG00000012584	gap junction protein beta 3 [Source:VGNC Symbol;Acc:VGNC:29378]
3	111519878	111522551	GJB4	ENSBTAG00000005719	gap junction protein beta 4 [Source:VGNC Symbol;Acc:VGNC:29379]
3	117913716	117955245	RAMP1	ENSBTAG00000011534	receptor activity-modifying protein 1 precursor [Source:RefSeq peptide;Acc:NP_001077246]
3	117987246	118032853	UBE2F	ENSBTAG00000026114	NEDD8-conjugating enzyme UBE2F [Source:UniProtKB/Swiss-Prot;Acc:Q1RMW1]
3	118043316	118073266	SCLY	ENSBTAG00000017826	Selenocysteine lyase [Source:UniProtKB/Swiss-Prot;Acc:A2VDS1]
3	118074855	118096926	ESPNL	ENSBTAG00000010164	espin like [Source:VGNC Symbol;Acc:VGNC:28604]
3	66755614	66755946	ENSBTAG00000031082	ENSBTAG00000031082
3	110649045	110649921	C1orf216	ENSBTAG00000038292	chromosome 1 open reading frame 216 [Source:HGNC Symbol;Acc:HGNC:26800]
3	111481702	111482589	GJA4	ENSBTAG00000013881	gap junction protein alpha 4 [Source:VGNC Symbol;Acc:VGNC:29373]
3	111524192	111525013	GJB5	ENSBTAG00000005717	gap junction protein beta 5 [Source:VGNC Symbol;Acc:VGNC:29380]
3	55877346	55877451	ENSBTAG00000044611	ENSBTAG00000044611
3	64875242	64875348	ENSBTAG00000043794	ENSBTAG00000043794
3	107486376	107486515	ENSBTAG00000043643	ENSBTAG00000043643
3	117980135	117980199	bta-mir-2902	ENSBTAG00000045663	bta-mir-2902 [Source:miRBase;Acc:MI0013077]
3	110389861	110389958	ENSBTAG00000045187	ENSBTAG00000045187
3	107466835	107466971	ENSBTAG00000044999	ENSBTAG00000044999
4	14920664	14929428	TAC1	ENSBTAG00000015356	tachykinin precursor 1 [Source:VGNC Symbol;Acc:VGNC:35555]
4	15035754	15183208	ASNS	ENSBTAG00000003222	Asparagine synthetase [glutamine-hydrolyzing] [Source:UniProtKB/Swiss-Prot;Acc:Q1LZA3]
4	44384161	44584754	FBXL13	ENSBTAG00000016324	F-box and leucine rich repeat protein 13 [Source:HGNC Symbol;Acc:HGNC:21658]
4	44481887	44517455	LRRC17	ENSBTAG00000024379	leucine rich repeat containing 17 [Source:HGNC Symbol;Acc:HGNC:16895]
4	75146925	75159359	HUS1	ENSBTAG00000013226	HUS1 checkpoint clamp component [Source:VGNC Symbol;Acc:VGNC:30008]
4	77458516	77512436	OGDH	ENSBTAG00000006029	oxoglutarate dehydrogenase [Source:VGNC Symbol;Acc:VGNC:32406]
4	77540574	77543351	TMED4	ENSBTAG00000010612	transmembrane p24 trafficking protein 4 [Source:VGNC Symbol;Acc:VGNC:35937]
4	77546487	77555844	DDX56	ENSBTAG00000010602	DEAD-box helicase 56 [Source:VGNC Symbol;Acc:VGNC:27978]
4	77572132	77593152	NPC1L1	ENSBTAG00000044146	NPC1 like intracellular cholesterol transporter 1 [Source:VGNC Symbol;Acc:VGNC:32195]
4	77598538	77670087	NUDCD3	ENSBTAG00000006325	NudC domain containing 3 [Source:VGNC Symbol;Acc:VGNC:32324]
4	77706698	77797331	CAMK2B	ENSBTAG00000012653	calcium/calmodulin dependent protein kinase II beta [Source:VGNC Symbol;Acc:VGNC:26722]
4	77966051	78017718	BLVRA	ENSBTAG00000013414	biliverdin reductase A [Source:VGNC Symbol;Acc:VGNC:26510]
4	78141987	78147625	COA1	ENSBTAG00000012968	cytochrome c oxidase assembly factor 1 homolog [Source:VGNC Symbol;Acc:VGNC:27542]
4	78160491	78174798	STK17A	ENSBTAG00000008143	serine/threonine-protein kinase 17A [Source:RefSeq peptide;Acc:NP_001076891]
4	78221619	78492463	HECW1	ENSBTAG00000021216	HECT, C2 and WW domain containing E3 ubiquitin protein ligase 1 [Source:HGNC Symbol;Acc:HGNC:22195]
4	79255149	79256324	ENSBTAG00000027525	ENSBTAG00000027525
4	79986254	79997754	INHBA	ENSBTAG00000002912	inhibin beta A subunit [Source:VGNC Symbol;Acc:VGNC:30200]
4	87522151	88100974	CADPS2	ENSBTAG00000005110	calcium dependent secretion activator 2 [Source:VGNC Symbol;Acc:VGNC:26699]
4	113720919	113729756	GIMAP7	ENSBTAG00000009850
4	113763391	113768447	ENSBTAG00000039588	ENSBTAG00000039588	GTPase, IMAP family member 5-like [Source:RefSeq peptide;Acc:NP_001073729]
4	113866800	113874303	GIMAP4	ENSBTAG00000046257
4	113910742	113941457	GIMAP7	ENSBTAG00000030940
4	113929347	113930227	ENSBTAG00000011240	ENSBTAG00000011240
4	113952126	113959951	ENSBTAG00000040331	ENSBTAG00000040331
4	114032643	114038805	ENSBTAG00000039928	ENSBTAG00000039928
4	114075524	114086267	GIMAP7	ENSBTAG00000008550	GTPase, IMAP family member 7 [Source:RefSeq peptide;Acc:NP_001098504]
4	114111965	114116379	ENSBTAG00000037510	ENSBTAG00000037510
4	114127188	114137744	GIMAP5	ENSBTAG00000004894	GTPase, IMAP family member 5 [Source:RefSeq peptide;Acc:NP_001073237]
4	114148311	114155451	ENSBTAG00000000715	ENSBTAG00000000715
4	114199462	114207377	TMEM176B	ENSBTAG00000016766	transmembrane protein 176B [Source:VGNC Symbol;Acc:VGNC:36001]
4	114803157	114855282	RHEB	ENSBTAG00000031861	Ras homolog, mTORC1 binding [Source:VGNC Symbol;Acc:VGNC:33939]
4	114825312	114825795	ENSBTAG00000047592	ENSBTAG00000047592
4	114885501	114925565	PRKAG2	ENSBTAG00000002917	protein kinase AMP-activated non-catalytic subunit gamma 2 [Source:HGNC Symbol;Acc:HGNC:9386]
4	114910414	114911389	ENSBTAG00000046461	ENSBTAG00000046461
4	117555541	117803944	ENSBTAG00000021941	ENSBTAG00000021941
4	117713085	117730633	HTR5A	ENSBTAG00000002891	5-hydroxytryptamine receptor 5A [Source:VGNC Symbol;Acc:VGNC:30001]
4	113780811	113781704	GIMAP7	ENSBTAG00000001198	GTPase, IMAP family member 7 [Source:RefSeq peptide;Acc:NP_001039773]
4	8490676	8494829	FZD1	ENSBTAG00000002107	frizzled class receptor 1 [Source:VGNC Symbol;Acc:VGNC:29165]
4	75346004	75346141	RF00601	ENSBTAG00000044309
4	76606178	76606255	bta-mir-2420	ENSBTAG00000044867	bta-mir-2420 [Source:miRBase;Acc:MI0011468]
4	34832630	34832736	RF00026	ENSBTAG00000042947
5	8836101	9062297	SYT1	ENSBTAG00000034693	synaptotagmin 1 [Source:VGNC Symbol;Acc:VGNC:35535]
5	9154161	9193343	ENSBTAG00000043949	ENSBTAG00000043949
5	15741026	15751868	MGAT4C	ENSBTAG00000011153	MGAT4 family member C [Source:VGNC Symbol;Acc:VGNC:31448]
5	35059697	35150452	ANO6	ENSBTAG00000002902	anoctamin 6 [Source:VGNC Symbol;Acc:VGNC:25955]
5	35174130	35174846	ENSBTAG00000026249	ENSBTAG00000026249
5	42837597	43112731	PTPRR	ENSBTAG00000015311	protein tyrosine phosphatase, receptor type R [Source:VGNC Symbol;Acc:VGNC:33557]
5	43114782	43239445	PTPRB	ENSBTAG00000015296	protein tyrosine phosphatase, receptor type B [Source:VGNC Symbol;Acc:VGNC:33545]
5	44100435	44116239	CCT2	ENSBTAG00000019156	chaperonin containing TCP1 subunit 2 [Source:VGNC Symbol;Acc:VGNC:26995]
5	44127711	44133546	FRS2	ENSBTAG00000019155	fibroblast growth factor receptor substrate 2 [Source:VGNC Symbol;Acc:VGNC:29120]
5	48917722	49009466	WIF1	ENSBTAG00000014758	WNT inhibitory factor 1 [Source:VGNC Symbol;Acc:VGNC:36938]
5	50861334	51163885	PPM1H	ENSBTAG00000011857	protein phosphatase, Mg2+/Mn2+ dependent 1H [Source:VGNC Symbol;Acc:VGNC:33214]
5	51220902	51331182	MON2	ENSBTAG00000011068	MON2 homolog, regulator of endosome-to-Golgi trafficking [Source:VGNC Symbol;Acc:VGNC:31553]
5	58796713	58797757	ENSBTAG00000031111	ENSBTAG00000031111
5	68385645	68645774	CHST11	ENSBTAG00000010644	carbohydrate sulfotransferase 11 [Source:VGNC Symbol;Acc:VGNC:27339]
5	68883546	68928003	ALDH1L2	ENSBTAG00000006326	aldehyde dehydrogenase 1 family member L2 [Source:VGNC Symbol;Acc:VGNC:25812]
5	68979110	69034136	WASHC4	ENSBTAG00000033735	WASH complex subunit 4 [Source:VGNC Symbol;Acc:VGNC:36868]
5	69039881	69091742	APPL2	ENSBTAG00000030784	adaptor protein, phosphotyrosine interacting with PH domain and leucine zipper 2 [Source:VGNC Symbol;Acc:VGNC:26041]
5	79167019	79258697	CAPRIN2	ENSBTAG00000019373	caprin family member 2 [Source:VGNC Symbol;Acc:VGNC:26752]
5	79274076	79339563	IPO8	ENSBTAG00000014106	importin 8 [Source:VGNC Symbol;Acc:VGNC:30245]
5	83398954	83986176	ITPR2	ENSBTAG00000002313	inositol 1,4,5-trisphosphate receptor type 2 [Source:VGNC Symbol;Acc:VGNC:30347]
5	94770904	94881418	PTPRO	ENSBTAG00000006256	protein tyrosine phosphatase, receptor type O [Source:VGNC Symbol;Acc:VGNC:33555]
5	103132709	103261137	ENSBTAG00000039470	ENSBTAG00000039470
5	103276708	103332323	ENSBTAG00000039256	ENSBTAG00000039256
5	105799704	105837839	GALNT8	ENSBTAG00000017378	polypeptide N-acetylgalactosaminyltransferase 8 [Source:HGNC Symbol;Acc:HGNC:4130]
5	105870530	105892347	NDUFA9	ENSBTAG00000005465	NADH dehydrogenase [ubiquinone] 1 alpha subcomplex subunit 9, mitochondrial [Source:UniProtKB/Swiss-Prot;Acc:P34943]
5	105896016	105941353	AKAP3	ENSBTAG00000001020	Bos taurus A-kinase anchoring protein 3 (AKAP3), mRNA. [Source:RefSeq mRNA;Acc:NM_001101039]
5	105946100	105985653	DYRK4	ENSBTAG00000007556	dual specificity tyrosine phosphorylation regulated kinase 4 [Source:HGNC Symbol;Acc:HGNC:3095]
5	105996438	106014092	ENSBTAG00000047347	ENSBTAG00000047347
5	106016835	106054324	ENSBTAG00000048162	ENSBTAG00000048162
5	11308520	11308714	TMA7	ENSBTAG00000033884	Translation machinery-associated protein 7 [Source:UniProtKB/Swiss-Prot;Acc:A1A4Q4]
5	31553988	31554917	ENSBTAG00000000280	ENSBTAG00000000280
5	31606428	31607357	ENSBTAG00000016905	ENSBTAG00000016905
5	31633257	31634195	OR8S1	ENSBTAG00000038670	olfactory receptor family 8 subfamily S member 1 [Source:HGNC Symbol;Acc:HGNC:19628]
5	31657346	31658254	ENSBTAG00000016317	ENSBTAG00000016317
5	105762455	105764041	KCNA6	ENSBTAG00000047191	potassium voltage-gated channel subfamily A member 6 [Source:HGNC Symbol;Acc:HGNC:6225]
5	58751279	58752217	ENSBTAG00000026030	ENSBTAG00000026030
5	58781761	58782696	ENSBTAG00000038521	ENSBTAG00000038521
5	58849295	58850254	OR6C76	ENSBTAG00000006313	olfactory receptor family 6 subfamily C member 76 [Source:HGNC Symbol;Acc:HGNC:31305]
5	51209080	51209164	bta-let-7i	ENSBTAG00000029994	bta-let-7i [Source:miRBase;Acc:MI0005065]
5	48952298	48952372	bta-mir-2429	ENSBTAG00000045248	bta-mir-2429 [Source:miRBase;Acc:MI0011479]
5	15694027	15694135	ENSBTAG00000043827	ENSBTAG00000043827
5	51133610	51133684	ENSBTAG00000046735	ENSBTAG00000046735
5	9174031	9174166	ENSBTAG00000043121	ENSBTAG00000043121
5	48996775	48996881	ENSBTAG00000042928	ENSBTAG00000042928
5	44133033	44133160	ENSBTAG00000042237	ENSBTAG00000042237
6	1947847	2082068	MARCH1	ENSBTAG00000044082	membrane associated ring-CH-type finger 1 [Source:VGNC Symbol;Acc:VGNC:31236]
6	2089641	2119479	TMA16	ENSBTAG00000012658	translation machinery associated 16 homolog [Source:VGNC Symbol;Acc:VGNC:35914]
6	4093248	4152761	QRFPR	ENSBTAG00000008255	pyroglutamylated RFamide peptide receptor [Source:VGNC Symbol;Acc:VGNC:33601]
6	26786780	26802348	ADH6	ENSBTAG00000006991	alcohol dehydrogenase 6 [Source:RefSeq peptide;Acc:NP_001039522]
6	26853175	26885435	ADH4	ENSBTAG00000034139	alcohol dehydrogenase 4 [Source:RefSeq peptide;Acc:NP_001095529]
6	26901379	26916216	ADH5	ENSBTAG00000016007	Alcohol dehydrogenase class-3 [Source:UniProtKB/Swiss-Prot;Acc:Q3ZC42]
6	26925349	26979063	METAP1	ENSBTAG00000016004	methionyl aminopeptidase 1 [Source:VGNC Symbol;Acc:VGNC:31395]
6	41709362	43021626	KCNIP4	ENSBTAG00000047743	potassium voltage-gated channel interacting protein 4 [Source:VGNC Symbol;Acc:VGNC:30452]
6	46975914	46988666	SMIM20	ENSBTAG00000003897
6	62632294	62661142	BEND4	ENSBTAG00000005567	BEN domain containing 4 [Source:VGNC Symbol;Acc:VGNC:26467]
6	66519802	66605788	GABRA2	ENSBTAG00000011817	gamma-aminobutyric acid receptor subunit alpha-2 precursor [Source:RefSeq peptide;Acc:NP_776966]
6	68695298	68741224	SLAIN2	ENSBTAG00000021963	SLAIN motif family member 2 [Source:VGNC Symbol;Acc:VGNC:34652]
6	70656589	70783547	LNX1	ENSBTAG00000020658	ligand of numb-protein X 1 [Source:VGNC Symbol;Acc:VGNC:50212]
6	78991885	79313522	ADGRL3	ENSBTAG00000013918	adhesion G protein-coupled receptor L3 precursor [Source:RefSeq peptide;Acc:NP_851376]
6	81299794	81300203	ENSBTAG00000024445	ENSBTAG00000024445
6	82560093	82962887	EPHA5	ENSBTAG00000009438	EPH receptor A5 [Source:VGNC Symbol;Acc:VGNC:28535]
6	86223188	86239206	ENSBTAG00000022205	ENSBTAG00000022205
6	86334723	86353208	ENSBTAG00000003523	ENSBTAG00000003523
6	87035926	87094952	SULT1E1	ENSBTAG00000011952	sulfotransferase family 1E member 1 [Source:VGNC Symbol;Acc:VGNC:35467]
6	87141556	87159096	CSN1S1	ENSBTAG00000007695	casein alpha s1 [Source:VGNC Symbol;Acc:VGNC:27763]
6	87179502	87188025	CSN2	ENSBTAG00000002632	casein beta [Source:VGNC Symbol;Acc:VGNC:27764]
6	87189736	87204439	HSTN	ENSBTAG00000048250	Histatherin [Source:UniProtKB/Swiss-Prot;Acc:C6KGD8]
6	92297159	92378158	USO1	ENSBTAG00000017028	USO1 vesicle transport factor [Source:VGNC Symbol;Acc:VGNC:36708]
6	92450703	92479053	PPEF2	ENSBTAG00000015449	serine/threonine-protein phosphatase with EF-hands 2 [Source:RefSeq peptide;Acc:NP_001192906]
6	92487186	92487991	ENSBTAG00000007692	ENSBTAG00000007692
6	101289985	101484302	WDFY3	ENSBTAG00000013495	WD repeat and FYVE domain containing 3 [Source:VGNC Symbol;Acc:VGNC:36877]
6	2146497	2149069	TKTL2	ENSBTAG00000008947	transketolase like 2 [Source:VGNC Symbol;Acc:VGNC:35886]
6	9049871	9050251	ENSBTAG00000034849	ENSBTAG00000034849
6	50977332	50977443	ENSBTAG00000042907	ENSBTAG00000042907
6	8901324	8901445	ENSBTAG00000047123	ENSBTAG00000047123
6	8907078	8907197	ENSBTAG00000045775	ENSBTAG00000045775
6	86241887	86241979	ENSBTAG00000045349	ENSBTAG00000045349
6	8905614	8905733	ENSBTAG00000045669	ENSBTAG00000045669
6	8896463	8896582	ENSBTAG00000046578	ENSBTAG00000046578
6	8902652	8902771	ENSBTAG00000045745	ENSBTAG00000045745
6	92416963	92417126	ENSBTAG00000032074	ENSBTAG00000032074
6	8903983	8904102	ENSBTAG00000045903	ENSBTAG00000045903
6	8908768	8908887	ENSBTAG00000047949	ENSBTAG00000047949
6	8900176	8900295	ENSBTAG00000046195	ENSBTAG00000046195
7	3315951	3381685	SNAP47	ENSBTAG00000004188	synaptosome associated protein 47 [Source:VGNC Symbol;Acc:VGNC:35053]
7	3381932	3387142	JMJD4	ENSBTAG00000004191	jumonji domain containing 4 [Source:HGNC Symbol;Acc:HGNC:25724]
7	3419014	3443864	ZNF354B	ENSBTAG00000017123	zinc finger protein 354B [Source:HGNC Symbol;Acc:HGNC:17197]
7	7820650	7850254	AP1M1	ENSBTAG00000013329	adaptor related protein complex 1 mu 1 subunit [Source:VGNC Symbol;Acc:VGNC:25979]
7	7854536	7861328	FAM32A	ENSBTAG00000046846	Protein FAM32A [Source:UniProtKB/Swiss-Prot;Acc:A6QR31]
7	7873255	7883711	CIB3	ENSBTAG00000016179	calcium and integrin binding family member 3 [Source:VGNC Symbol;Acc:VGNC:27361]
7	7886059	7894496	HSH2D	ENSBTAG00000038154	hematopoietic SH2 domain containing [Source:VGNC Symbol;Acc:VGNC:29986]
7	7899037	7919167	RAB8A	ENSBTAG00000038696	RAB8A, member RAS oncogene family [Source:VGNC Symbol;Acc:VGNC:33662]
7	28414756	28465352	LMNB1	ENSBTAG00000002882	lamin B1 [Source:VGNC Symbol;Acc:VGNC:30930]
7	28548894	28554475	TEX43	ENSBTAG00000046718	testis expressed 43 [Source:VGNC Symbol;Acc:VGNC:35771]
7	28555707	28568143	PHAX	ENSBTAG00000009647	phosphorylated adaptor for RNA export [Source:VGNC Symbol;Acc:VGNC:32807]
7	28572141	28617279	ALDH7A1	ENSBTAG00000009646	aldehyde dehydrogenase 7 family member A1 [Source:VGNC Symbol;Acc:VGNC:25818]
7	30346723	30452439	ZNF608	ENSBTAG00000016137	zinc finger protein 608 [Source:VGNC Symbol;Acc:VGNC:37311]
7	41337278	41354610	MGAT1	ENSBTAG00000001546	mannosyl (alpha-1,3-)-glycoprotein beta-1,2-N-acetylglucosaminyltransferase [Source:HGNC Symbol;Acc:HGNC:7044]
7	41444283	41445695	ENSBTAG00000046424	ENSBTAG00000046424
7	41476354	41476823	ENSBTAG00000046066	ENSBTAG00000046066
7	41568976	41582156	ENSBTAG00000047300	ENSBTAG00000047300
7	41588234	41590604	ENSBTAG00000039706	ENSBTAG00000039706
7	42028059	42075814	NLRP3	ENSBTAG00000001273	NLR family pyrin domain containing 3 [Source:VGNC Symbol;Acc:VGNC:32117]
7	42171048	42171970	ENSBTAG00000047846	ENSBTAG00000047846
7	42623076	42637851	TRIM58	ENSBTAG00000007470	tripartite motif containing 58 [Source:VGNC Symbol;Acc:VGNC:36343]
7	42688918	42691147	ENSBTAG00000039805	ENSBTAG00000039805
7	42811931	42813032	ENSBTAG00000047016	ENSBTAG00000047016
7	43938530	43943848	SH3BP5L	ENSBTAG00000002645	SH3 binding domain protein 5 like [Source:VGNC Symbol;Acc:VGNC:34569]
7	43970323	43978604	ZNF692	ENSBTAG00000021115	zinc finger protein 692 [Source:VGNC Symbol;Acc:VGNC:37330]
7	44009279	44010145	ENSBTAG00000023507	ENSBTAG00000023507
7	44174213	44175537	ENSBTAG00000009273	ENSBTAG00000009273
7	44490472	44491549	ENSBTAG00000045623	ENSBTAG00000045623
7	45789552	45801206	KLF16	ENSBTAG00000038055	Kruppel like factor 16 [Source:HGNC Symbol;Acc:HGNC:16857]
7	45808716	45816928	ABHD17A	ENSBTAG00000025277	abhydrolase domain containing 17A [Source:VGNC Symbol;Acc:VGNC:25497]
7	45838685	45856001	SCAMP4	ENSBTAG00000045762	secretory carrier membrane protein 4 [Source:VGNC Symbol;Acc:VGNC:34318]
7	45879083	45887704	CSNK1G2	ENSBTAG00000016797	casein kinase 1 gamma 2 [Source:VGNC Symbol;Acc:VGNC:27767]
7	45901193	45923944	BTBD2	ENSBTAG00000016108	BTB domain containing 2 [Source:VGNC Symbol;Acc:VGNC:26589]
7	46313139	46315785	ENSBTAG00000004032	ENSBTAG00000004032
7	46454414	46511730	FSTL4	ENSBTAG00000017105	follistatin like 4 [Source:HGNC Symbol;Acc:HGNC:21389]
7	54857213	54878162	ENSBTAG00000018503	ENSBTAG00000018503
7	59782768	60099412	PPP2R2B	ENSBTAG00000001862	protein phosphatase 2 regulatory subunit Bbeta [Source:VGNC Symbol;Acc:VGNC:33256]
7	63190542	63267311	PDE6A	ENSBTAG00000012945	phosphodiesterase 6A [Source:VGNC Symbol;Acc:VGNC:32679]
7	63294621	63298306	SLC26A2	ENSBTAG00000014615	solute carrier family 26 member 2 [Source:VGNC Symbol;Acc:VGNC:34777]
7	63316372	63378839	HMGXB3	ENSBTAG00000012768	HMG-box containing 3 [Source:VGNC Symbol;Acc:VGNC:29882]
7	63709271	63747740	TCOF1	ENSBTAG00000015224	treacle ribosome biogenesis factor 1 [Source:VGNC Symbol;Acc:VGNC:35700]
7	63748885	63756646	CD74	ENSBTAG00000015228	CD74 molecule [Source:HGNC Symbol;Acc:HGNC:1697]
7	63761742	63779251	RPS14	ENSBTAG00000008570
7	63816088	63900637	NDST1	ENSBTAG00000001692	N-deacetylase and N-sulfotransferase 1 [Source:VGNC Symbol;Acc:VGNC:31942]
7	42579838	42580806	ENSBTAG00000040109	ENSBTAG00000040109
7	42597223	42598194	OR11L1	ENSBTAG00000017725	olfactory receptor family 11 subfamily L member 1 [Source:HGNC Symbol;Acc:HGNC:14998]
7	42608975	42609898	ENSBTAG00000038623	ENSBTAG00000038623
7	42651611	42652555	ENSBTAG00000025293	ENSBTAG00000025293
7	42678163	42679104	ENSBTAG00000039797	ENSBTAG00000039797
7	42747369	42748307	ENSBTAG00000046318	ENSBTAG00000046318
7	42787986	42788915	ENSBTAG00000007557	ENSBTAG00000007557
7	42833645	42834607	ENSBTAG00000046417	ENSBTAG00000046417
7	42868129	42869064	ENSBTAG00000027241	ENSBTAG00000027241
7	42890345	42891283	ENSBTAG00000045733	ENSBTAG00000045733
7	43967504	43968901	ZNF672	ENSBTAG00000046984	zinc finger protein 672 [Source:HGNC Symbol;Acc:HGNC:26179]
7	44130119	44131060	ENSBTAG00000046953	ENSBTAG00000046953
7	44464560	44465483	ENSBTAG00000045589	ENSBTAG00000045589
7	41404242	41406959	ZFP62	ENSBTAG00000039711	ZFP62 zinc finger protein [Source:VGNC Symbol;Acc:VGNC:37166]
7	41463093	41464070	ENSBTAG00000024713	ENSBTAG00000024713
7	41516960	41517898	ENSBTAG00000047182	ENSBTAG00000047182
7	41551825	41552772	ENSBTAG00000009285	ENSBTAG00000009285
7	42084486	42085424	ENSBTAG00000039986	ENSBTAG00000039986
7	42117712	42118719	OR2B11	ENSBTAG00000039422	olfactory receptor family 2 subfamily B member 11 [Source:HGNC Symbol;Acc:HGNC:31249]
7	42177317	42178276	ENSBTAG00000048315	ENSBTAG00000048315
7	42190889	42191833	ENSBTAG00000048069	ENSBTAG00000048069
7	7809394	7809519	ENSBTAG00000042477	ENSBTAG00000042477
7	28498780	28498886	ENSBTAG00000047241	ENSBTAG00000047241
7	46406446	46406564	ENSBTAG00000046106	ENSBTAG00000046106
7	63703333	63703441	ENSBTAG00000043927	ENSBTAG00000043927
8	48223036	48303993	TMEM2	ENSBTAG00000005090	transmembrane protein 2 [Source:VGNC Symbol;Acc:VGNC:36021]
8	48892499	48902995	ZFAND5	ENSBTAG00000009417	zinc finger AN1-type containing 5 [Source:VGNC Symbol;Acc:VGNC:37153]
8	48953078	48954464	ENSBTAG00000022796	ENSBTAG00000022796
8	60529722	60531125	ENSBTAG00000045958	ENSBTAG00000045958
8	60562019	60563035	ENSBTAG00000032668	ENSBTAG00000032668
8	83978960	84133609	ERCC6L2	ENSBTAG00000020626	DNA excision repair protein ERCC-6-like 2 [Source:RefSeq peptide;Acc:NP_001076075]
8	92744050	92751166	MRPL50	ENSBTAG00000008962	mitochondrial ribosomal protein L50 [Source:VGNC Symbol;Acc:VGNC:31645]
8	92751543	92762917	ZNF189	ENSBTAG00000015348	zinc finger protein 189 [Source:VGNC Symbol;Acc:VGNC:37220]
8	92773692	92865307	ALDOB	ENSBTAG00000015358	aldolase, fructose-bisphosphate B [Source:VGNC Symbol;Acc:VGNC:25822]
8	92824740	92865294	TMEM246	ENSBTAG00000020844	transmembrane protein 246 [Source:VGNC Symbol;Acc:VGNC:36056]
8	101361501	101406330	AKAP2	ENSBTAG00000014471	A-kinase anchoring protein 2 [Source:HGNC Symbol;Acc:HGNC:372]
8	101433014	101438257	C8H9orf152	ENSBTAG00000003240	uncharacterized protein C9orf152 homolog [Source:RefSeq peptide;Acc:NP_001193106]
8	101484812	101492588	TXN	ENSBTAG00000002953	thioredoxin [Source:RefSeq peptide;Acc:NP_776393]
8	101520566	101552954	TXNDC8	ENSBTAG00000010535	thioredoxin domain containing 8 [Source:VGNC Symbol;Acc:VGNC:36539]
8	102051154	102141484	LPAR1	ENSBTAG00000009654	lysophosphatidic acid receptor 1 [Source:VGNC Symbol;Acc:VGNC:30955]
8	102504818	102589796	ECPAS	ENSBTAG00000006712	Ecm29 proteasome adaptor and scaffold [Source:VGNC Symbol;Acc:VGNC:30551]
8	102635721	102649996	ZNF483	ENSBTAG00000012390	zinc finger protein 483 [Source:VGNC Symbol;Acc:VGNC:37284]
8	102666740	102697281	PTGR1	ENSBTAG00000011027	prostaglandin reductase 1 [Source:VGNC Symbol;Acc:VGNC:33510]
8	102759008	102776534	DNAJC25	ENSBTAG00000030960	DnaJ heat shock protein family (Hsp40) member C25 [Source:HGNC Symbol;Acc:HGNC:34187]
8	102784501	102790524	GNG10	ENSBTAG00000009087	G protein subunit gamma 10 [Source:HGNC Symbol;Acc:HGNC:4402]
8	102796661	102872318	C9orf84	ENSBTAG00000044004	chromosome 9 open reading frame 84 [Source:HGNC Symbol;Acc:HGNC:26535]
8	104797238	104995986	ZNF618	ENSBTAG00000025659	zinc finger protein 618 [Source:VGNC Symbol;Acc:VGNC:37314]
8	102489020	102489970	OR2K2	ENSBTAG00000010686	olfactory receptor family 2 subfamily K member 2 [Source:HGNC Symbol;Acc:HGNC:8264]
8	60510530	60511468	ENSBTAG00000045900	ENSBTAG00000045900
8	60546082	60547020	ENSBTAG00000032669	ENSBTAG00000032669
8	60634515	60635474	OR2S2	ENSBTAG00000032670	olfactory receptor family 2 subfamily S member 2 (gene/pseudogene) [Source:HGNC Symbol;Acc:HGNC:8276]
8	60644675	60645634	ENSBTAG00000047099	ENSBTAG00000047099
8	16269365	16271185	LINGO2	ENSBTAG00000016070	leucine rich repeat and Ig domain containing 2 [Source:VGNC Symbol;Acc:VGNC:30900]
8	15978603	15979256	ENSBTAG00000018340	ENSBTAG00000018340
8	48360400	48360475	ENSBTAG00000045321	ENSBTAG00000045321
8	107024954	107025034	ENSBTAG00000044523	ENSBTAG00000044523
8	102117078	102117210	ENSBTAG00000043478	ENSBTAG00000043478
8	60639420	60639535	ENSBTAG00000036921	ENSBTAG00000036921
9	13421249	13551857	CD109	ENSBTAG00000013222	CD109 molecule [Source:VGNC Symbol;Acc:VGNC:27002]
9	41703441	41802334	ARMC2	ENSBTAG00000036087	armadillo repeat containing 2 [Source:HGNC Symbol;Acc:HGNC:23045]
9	94882344	95271883	ARID1B	ENSBTAG00000002728	AT-rich interaction domain 1B [Source:VGNC Symbol;Acc:VGNC:26124]
9	104735657	104760261	THBS2	ENSBTAG00000018810	thrombospondin 2 [Source:VGNC Symbol;Acc:VGNC:35829]
10	17516709	17559258	UACA	ENSBTAG00000013982	uveal autoantigen with coiled-coil domains and ankyrin repeats [Source:VGNC Symbol;Acc:VGNC:36558]
10	22106909	23304334	ENSBTAG00000000432	ENSBTAG00000000432
10	22318715	22462591	ENSBTAG00000039402	ENSBTAG00000039402
10	22349889	22350520	ENSBTAG00000047156	ENSBTAG00000047156
10	47955995	47957472	C2CD4B	ENSBTAG00000020814	C2 calcium-dependent domain-containing protein 4A [Source:UniProtKB/Swiss-Prot;Acc:Q2KJ18]
10	103185307	103381020	TTC7B	ENSBTAG00000006392	tetratricopeptide repeat domain 7B [Source:VGNC Symbol;Acc:VGNC:36481]
10	38814396	38814674	ENSBTAG00000046363	ENSBTAG00000046363
10	103345894	103346020	ENSBTAG00000043774	ENSBTAG00000043774
11	2730998	2762524	CNNM3	ENSBTAG00000010846	cyclin and CBS domain divalent metal cation transport mediator 3 [Source:VGNC Symbol;Acc:VGNC:27512]
11	2768909	2773197	ANKRD23	ENSBTAG00000010849	ankyrin repeat domain 23 [Source:VGNC Symbol;Acc:VGNC:25917]
11	2775465	2782703	ANKRD39	ENSBTAG00000035244	ankyrin repeat domain 39 [Source:VGNC Symbol;Acc:VGNC:25929]
11	2784990	2793644	SEMA4C	ENSBTAG00000021920	semaphorin 4C [Source:VGNC Symbol;Acc:VGNC:34435]
11	2798822	2907015	FAM178B	ENSBTAG00000006019	family with sequence similarity 178 member B [Source:HGNC Symbol;Acc:HGNC:28036]
11	5907340	6000528	NPAS2	ENSBTAG00000019697	neuronal PAS domain protein 2 [Source:VGNC Symbol;Acc:VGNC:32190]
11	6003175	6008528	RPL31	ENSBTAG00000019701	60S ribosomal protein L31 [Source:UniProtKB/Swiss-Prot;Acc:Q56JX3]
11	6009139	6070490	TBC1D8	ENSBTAG00000025898	TBC1 domain family member 8 [Source:VGNC Symbol;Acc:VGNC:35645]
11	7153231	7179569	IL18R1	ENSBTAG00000001034	interleukin 18 receptor 1 [Source:VGNC Symbol;Acc:VGNC:30127]
11	7196920	7221257	IL18RAP	ENSBTAG00000033748	interleukin 18 receptor accessory protein [Source:VGNC Symbol;Acc:VGNC:30128]
11	7229706	7284500	SLC9A4	ENSBTAG00000024075	solute carrier family 9 member A4 [Source:VGNC Symbol;Acc:VGNC:34943]
11	11202919	11207042	PRADC1	ENSBTAG00000008765	protease associated domain containing 1 [Source:VGNC Symbol;Acc:VGNC:33282]
11	11207525	11219350	SMYD5	ENSBTAG00000008764	SMYD family member 5 [Source:VGNC Symbol;Acc:VGNC:35046]
11	11221415	11227722	NOTO	ENSBTAG00000024061	notochord homeobox [Source:VGNC Symbol;Acc:VGNC:32180]
11	11315219	11356938	RAB11FIP5	ENSBTAG00000006162	rab11 family-interacting protein 5 [Source:RefSeq peptide;Acc:NP_001179798]
11	30823435	30888003	LHCGR	ENSBTAG00000016573	lutropin-choriogonadotropic hormone receptor precursor [Source:RefSeq peptide;Acc:NP_776806]
11	30962350	30963034	ENSBTAG00000027015	ENSBTAG00000027015
11	47479962	47484355	FOXI3	ENSBTAG00000040093	forkhead box I3 [Source:HGNC Symbol;Acc:HGNC:35123]
11	48248720	48304335	KDM3A	ENSBTAG00000013580	lysine demethylase 3A [Source:VGNC Symbol;Acc:VGNC:30525]
11	48389168	48525009	REEP1	ENSBTAG00000004824	receptor accessory protein 1 [Source:VGNC Symbol;Acc:VGNC:33851]
11	54723190	55906462	CTNNA2	ENSBTAG00000031669
11	56639963	56642712	REG3A	ENSBTAG00000011314	Lithostathine Lithostathine A chain Lithostathine B chain [Source:UniProtKB/Swiss-Prot;Acc:P23132]
11	60268166	60268762	ENSBTAG00000039218	ENSBTAG00000039218
11	60352576	60381305	FAM161A	ENSBTAG00000009290	family with sequence similarity 161 member A [Source:VGNC Symbol;Acc:VGNC:28742]
11	60397422	60410035	CCT4	ENSBTAG00000004531	chaperonin containing TCP1 subunit 4 [Source:VGNC Symbol;Acc:VGNC:26997]
11	60427663	60598437	COMMD1	ENSBTAG00000019867	copper metabolism domain containing 1 [Source:VGNC Symbol;Acc:VGNC:27581]
11	89100478	89101344	ENSBTAG00000037793	ENSBTAG00000037793
11	89875186	89967246	RNF144A	ENSBTAG00000044064	ring finger protein 144A [Source:VGNC Symbol;Acc:VGNC:34026]
11	92577651	92664126	DAB2IP	ENSBTAG00000008232	DAB2 interacting protein [Source:VGNC Symbol;Acc:VGNC:27866]
11	100432297	100484528	GPR107	ENSBTAG00000004204	G protein-coupled receptor 107 [Source:VGNC Symbol;Acc:VGNC:29544]
11	100548300	100564121	NCS1	ENSBTAG00000008726	neuronal calcium sensor 1 [Source:VGNC Symbol;Acc:VGNC:31928]
11	100603004	100777880	HMCN2	ENSBTAG00000002319	hemicentin 2 [Source:HGNC Symbol;Acc:HGNC:21293]
11	100791339	100843336	ASS1	ENSBTAG00000020747	argininosuccinate synthase 1 [Source:VGNC Symbol;Acc:VGNC:26224]
11	101977235	102196459	MED27	ENSBTAG00000000382	mediator complex subunit 27 [Source:VGNC Symbol;Acc:VGNC:31363]
11	11283273	11283761	ENSBTAG00000008035	ENSBTAG00000008035
11	7255469	7255575	ENSBTAG00000042997	ENSBTAG00000042997
11	57242754	57242916	ENSBTAG00000028628	ENSBTAG00000028628
11	11303149	11303443	ENSBTAG00000043946	ENSBTAG00000043946
11	55919307	55919413	ENSBTAG00000044821	ENSBTAG00000044821	RNA, U6 small nuclear 561, pseudogene [Source:HGNC Symbol;Acc:HGNC:47524]
11	11316131	11316193	bta-mir-2294	ENSBTAG00000044590	bta-mir-2294 [Source:miRBase;Acc:MI0011304]
12	11705780	12059605	VWA8	ENSBTAG00000001133	von Willebrand factor A domain containing 8 [Source:VGNC Symbol;Acc:VGNC:36856]
12	12293695	12405237	DGKH	ENSBTAG00000013879	diacylglycerol kinase eta [Source:VGNC Symbol;Acc:VGNC:28029]
12	12459630	12495973	AKAP11	ENSBTAG00000014752	A-kinase anchoring protein 11 [Source:VGNC Symbol;Acc:VGNC:25781]
12	13381950	13634620	ENOX1	ENSBTAG00000012434	ecto-NOX disulfide-thiol exchanger 1 [Source:VGNC Symbol;Acc:VGNC:28502]
12	20704476	20778873	FAM124A	ENSBTAG00000046408	family with sequence similarity 124 member A [Source:VGNC Symbol;Acc:VGNC:28723]
12	74816045	74978179	ENSBTAG00000023309	ENSBTAG00000023309
12	76867834	76922959	DZIP1	ENSBTAG00000003569	DAZ interacting zinc finger protein 1 [Source:VGNC Symbol;Acc:VGNC:28284]
12	76958978	77024110	DNAJC3	ENSBTAG00000012065	dnaJ homolog subfamily C member 3 precursor [Source:RefSeq peptide;Acc:NP_777181]
12	77032586	77176916	UGGT2	ENSBTAG00000004401	UDP-glucose glycoprotein glucosyltransferase 2 [Source:VGNC Symbol;Acc:VGNC:36650]
12	44822977	44823477	ENSBTAG00000046942	ENSBTAG00000046942
12	44865039	44865164	ENSBTAG00000042849	ENSBTAG00000042849
13	9835625	10043048	MACROD2	ENSBTAG00000034441	O-acetyl-ADP-ribose deacetylase MACROD2 [Source:RefSeq peptide;Acc:NP_001098499]
13	12199764	12246148	CDC123	ENSBTAG00000019511	cell division cycle 123 [Source:VGNC Symbol;Acc:VGNC:27058]
13	12246303	12266216	NUDT5	ENSBTAG00000019509	nudix hydrolase 5 [Source:VGNC Symbol;Acc:VGNC:32339]
13	12269034	12291725	SEC61A2	ENSBTAG00000019508	Sec61 translocon alpha 2 subunit [Source:VGNC Symbol;Acc:VGNC:49137]
13	12294011	12339110	DHTKD1	ENSBTAG00000000291	dehydrogenase E1 and transketolase domain containing 1 [Source:VGNC Symbol;Acc:VGNC:28047]
13	17093614	17185063	PRKCQ	ENSBTAG00000010664	protein kinase C theta [Source:VGNC Symbol;Acc:VGNC:33334]
13	17540961	17586321	IL2RA	ENSBTAG00000020892	interleukin-2 receptor subunit alpha precursor [Source:RefSeq peptide;Acc:NP_776783]
13	17623242	17639994	ENSBTAG00000006078	ENSBTAG00000006078
13	17650891	17690062	FBXO18	ENSBTAG00000004147	F-box protein, helicase, 18 [Source:VGNC Symbol;Acc:VGNC:28896]
13	17742124	17783203	ENSBTAG00000036222	ENSBTAG00000036222
13	23900873	24085889	PIP4K2A	ENSBTAG00000018033	phosphatidylinositol-5-phosphate 4-kinase type 2 alpha [Source:VGNC Symbol;Acc:VGNC:32906]
13	60684667	60691970	RSPO4	ENSBTAG00000021885	R-spondin 4 [Source:VGNC Symbol;Acc:VGNC:34190]
13	77566190	77671122	PREX1	ENSBTAG00000015609	phosphatidylinositol-3,4,5-trisphosphate dependent Rac exchange factor 1 [Source:HGNC Symbol;Acc:HGNC:32594]
13	78845236	78873171	UBE2V1	ENSBTAG00000027316	Ubiquitin-conjugating enzyme E2 variant 1 [Source:UniProtKB/Swiss-Prot;Acc:Q3SZ52]
13	78882751	78907460	TMEM189	ENSBTAG00000010135	transmembrane protein 189 [Source:RefSeq peptide;Acc:NP_001093785]
13	24073637	24073742	RF00020	ENSBTAG00000044698
13	12039484	12039612	RF00619	ENSBTAG00000045070
14	17453321	17627190	FER1L6	ENSBTAG00000013537	fer-1 like family member 6 [Source:VGNC Symbol;Acc:VGNC:28950]
14	23511301	23558678	ATP6V1H	ENSBTAG00000003450	ATPase H+ transporting V1 subunit H [Source:VGNC Symbol;Acc:VGNC:26326]
14	23561303	23613020	RGS20	ENSBTAG00000003454	regulator of G protein signaling 20 [Source:VGNC Symbol;Acc:VGNC:33919]
14	31695684	31720448	ARMC1	ENSBTAG00000015901	armadillo repeat containing 1 [Source:VGNC Symbol;Acc:VGNC:26155]
14	31735268	31794502	MTFR1	ENSBTAG00000008629	mitochondrial fission regulator 1 [Source:VGNC Symbol;Acc:VGNC:31726]
14	32050488	32143515	DNAJC5B	ENSBTAG00000015229	DnaJ homolog subfamily C member 5B [Source:UniProtKB/Swiss-Prot;Acc:Q2KIJ8]
14	32164442	32210852	TRIM55	ENSBTAG00000021009	tripartite motif containing 55 [Source:VGNC Symbol;Acc:VGNC:36341]
14	32213577	32215193	CRH	ENSBTAG00000033128	corticotropin releasing hormone [Source:VGNC Symbol;Acc:VGNC:27707]
14	34040796	34340573	PREX2	ENSBTAG00000022169	phosphatidylinositol-3,4,5-trisphosphate dependent Rac exchange factor 2 [Source:VGNC Symbol;Acc:VGNC:33312]
14	46336282	46354162	PAG1	ENSBTAG00000014026	phosphoprotein membrane anchor with glycosphingolipid microdomains 1 [Source:VGNC Symbol;Acc:VGNC:32553]
14	78908052	78964199	ATP6V0D2	ENSBTAG00000021092	ATPase H+ transporting V0 subunit d2 [Source:VGNC Symbol;Acc:VGNC:26313]
14	12821789	12821863	ENSBTAG00000045200	ENSBTAG00000045200
14	84619377	84619483	ENSBTAG00000043120	ENSBTAG00000043120
14	25492090	25492184	ENSBTAG00000043923	ENSBTAG00000043923
14	31505038	31505144	ENSBTAG00000042153	ENSBTAG00000042153
14	7325360	7325483	ENSBTAG00000045100	ENSBTAG00000045100
15	24093189	24165578	NCAM1	ENSBTAG00000005710	neural cell adhesion molecule 1 [Source:VGNC Symbol;Acc:VGNC:31898]
15	41624351	41980708	GALNT18	ENSBTAG00000002914	polypeptide N-acetylgalactosaminyltransferase 18 [Source:VGNC Symbol;Acc:VGNC:29230]
15	48181826	48182813	ENSBTAG00000039029	ENSBTAG00000039029
15	48225177	48226235	ENSBTAG00000026922	ENSBTAG00000026922	Bos taurus olfactory receptor 52N4-like (LOC100847801), mRNA. [Source:RefSeq mRNA;Acc:NM_001255967]
15	48252517	48253458	ENSBTAG00000046764	ENSBTAG00000046764
15	48272412	48288246	ENSBTAG00000047088	ENSBTAG00000047088
15	48323709	48332456	ENSBTAG00000005609	ENSBTAG00000005609
15	48372076	48372968	ENSBTAG00000000953	ENSBTAG00000000953
15	48428346	48445590	ENSBTAG00000038536	ENSBTAG00000038536
15	48997631	48999478	HBE1	ENSBTAG00000037815
15	49833389	49834463	OR52E2	ENSBTAG00000048307	olfactory receptor family 52 subfamily E member 2 [Source:HGNC Symbol;Acc:HGNC:14769]
15	49890845	49891791	ENSBTAG00000040139	ENSBTAG00000040139
15	49911998	49912940	ENSBTAG00000045872	ENSBTAG00000045872
15	50008044	50009176	ENSBTAG00000008312	ENSBTAG00000008312
15	50040920	50041904	ENSBTAG00000047960	ENSBTAG00000047960
15	50094318	50095966	ENSBTAG00000046624	ENSBTAG00000046624
15	51667478	51669427	ENSBTAG00000040380	ENSBTAG00000040380
15	56827092	56834190	LRRC32	ENSBTAG00000001301	leucine rich repeat containing 32 [Source:HGNC Symbol;Acc:HGNC:4161]
15	56861017	56891958	ENSBTAG00000027438	ENSBTAG00000027438
15	62491158	62539312	DCDC1	ENSBTAG00000006060	doublecortin domain containing 1 [Source:HGNC Symbol;Acc:HGNC:20625]
15	77842409	77847738	ENSBTAG00000038160	ENSBTAG00000038160
15	77905428	77907044	ENSBTAG00000016082	ENSBTAG00000016082
15	77964413	77966408	ENSBTAG00000046354	ENSBTAG00000046354
15	81105854	81107065	ENSBTAG00000023542	ENSBTAG00000023542
15	81119009	81119949	ENSBTAG00000046187	ENSBTAG00000046187
15	49804640	49805584	ENSBTAG00000046913	ENSBTAG00000046913
15	49851335	49852276	ENSBTAG00000040408	ENSBTAG00000040408
15	49922808	49923752	ENSBTAG00000035006	ENSBTAG00000035006
15	49939351	49940289	ENSBTAG00000035008	ENSBTAG00000035008
15	50018821	50019780	ENSBTAG00000045488	ENSBTAG00000045488
15	50080176	50081135	ENSBTAG00000035027	ENSBTAG00000035027
15	51686256	51686840	ENSBTAG00000045556	ENSBTAG00000045556
15	51733363	51734307	ENSBTAG00000031903	ENSBTAG00000031903
15	51778327	51779310	ENSBTAG00000035686	ENSBTAG00000035686
15	51796620	51797639	ENSBTAG00000005070	ENSBTAG00000005070
15	81042867	81043799	OR5M3	ENSBTAG00000039182	olfactory receptor family 5 subfamily M member 3 [Source:HGNC Symbol;Acc:HGNC:14806]
15	81067188	81068141	OR5M11	ENSBTAG00000040330	olfactory receptor family 5 subfamily M member 11 [Source:HGNC Symbol;Acc:HGNC:15291]
15	81091987	81092922	ENSBTAG00000016146	ENSBTAG00000016146
15	81133288	81134238	OR5AR1	ENSBTAG00000006421	olfactory receptor family 5 subfamily AR member 1 (gene/pseudogene) [Source:HGNC Symbol;Acc:HGNC:15260]
15	81147757	81148686	ENSBTAG00000036130	ENSBTAG00000036130
15	47551031	47551984	ENSBTAG00000038977	ENSBTAG00000038977
15	47566765	47567742	ENSBTAG00000027443	ENSBTAG00000027443
15	47577990	47578946	ENSBTAG00000000368	ENSBTAG00000000368
15	47629006	47629947	ENSBTAG00000032276	ENSBTAG00000032276
15	47668551	47669498	ENSBTAG00000048223	ENSBTAG00000048223
15	47683171	47684118	ENSBTAG00000047246	ENSBTAG00000047246
15	77811544	77812485	ENSBTAG00000012546	ENSBTAG00000012546
15	48164656	48165627	ENSBTAG00000026924	ENSBTAG00000026924
15	48191234	48192157	ENSBTAG00000046618	ENSBTAG00000046618
15	48240561	48241508	ENSBTAG00000016119	ENSBTAG00000016119
15	48405343	48406284	ENSBTAG00000002043	ENSBTAG00000002043
15	48852959	48853909	ENSBTAG00000039088	ENSBTAG00000039088
15	48863186	48864151	OR51Q1	ENSBTAG00000037992	olfactory receptor family 51 subfamily Q member 1 (gene/pseudogene) [Source:HGNC Symbol;Acc:HGNC:14851]
15	48884648	48885589	ENSBTAG00000019544	ENSBTAG00000019544
15	48900173	48901135	OR51M1	ENSBTAG00000019549	olfactory receptor family 51 subfamily M member 1 [Source:HGNC Symbol;Acc:HGNC:14847]
15	48250683	48251648	ENSBTAG00000006815	ENSBTAG00000006815
15	48977301	48977457	ENSBTAG00000044742	ENSBTAG00000044742
16	13041921	13045220	RGS2	ENSBTAG00000034366	Bos taurus regulator of G-protein signaling 2, 24kDa (RGS2), mRNA. [Source:RefSeq mRNA;Acc:NM_001075596]
16	15798745	16267012	BRINP3	ENSBTAG00000008420	BMP/retinoic acid inducible neural specific 3 [Source:VGNC Symbol;Acc:VGNC:26568]
16	19573856	20502175	USH2A	ENSBTAG00000006188	usherin [Source:VGNC Symbol;Acc:VGNC:36706]
16	19881716	19882860	ENSBTAG00000007997	ENSBTAG00000007997
16	40118745	40472474	DNM3	ENSBTAG00000014319	dynamin-3 [Source:RefSeq peptide;Acc:NP_001230213]
16	44263938	44385466	UBE4B	ENSBTAG00000010401	ubiquitination factor E4B [Source:VGNC Symbol;Acc:VGNC:36604]
16	44427129	44447695	RBP7	ENSBTAG00000015574	retinol binding protein 7 [Source:VGNC Symbol;Acc:VGNC:33817]
16	44457295	44462940	NMNAT1	ENSBTAG00000001361	nicotinamide nucleotide adenylyltransferase 1 [Source:VGNC Symbol;Acc:VGNC:32132]
16	45289118	45313929	CA6	ENSBTAG00000009515	carbonic anhydrase 6 [Source:VGNC Symbol;Acc:VGNC:26656]
16	45401695	45416462	ENO1	ENSBTAG00000013411	alpha-enolase [Source:RefSeq peptide;Acc:NP_776474]
16	46124225	46125720	ENSBTAG00000011650	ENSBTAG00000011650
16	46201192	46215455	ERRFI1	ENSBTAG00000006609	ERBB receptor feedback inhibitor 1 [Source:VGNC Symbol;Acc:VGNC:28598]
16	46249163	46265920	PARK7	ENSBTAG00000020518	Parkinsonism associated deglycase [Source:VGNC Symbol;Acc:VGNC:32586]
16	46288366	46306428	TNFRSF9	ENSBTAG00000003313	TNF receptor superfamily member 9 [Source:VGNC Symbol;Acc:VGNC:36171]
16	48024410	48077736	CHD5	ENSBTAG00000040477	chromodomain helicase DNA binding protein 5 [Source:HGNC Symbol;Acc:HGNC:16816]
16	48081092	48137067	KCNAB2	ENSBTAG00000008125	potassium voltage-gated channel subfamily A regulatory beta subunit 2 [Source:VGNC Symbol;Acc:VGNC:30428]
16	48181539	48314477	NPHP4	ENSBTAG00000008126	nephrocystin 4 [Source:VGNC Symbol;Acc:VGNC:32203]
16	61559977	61718623	RALGPS2	ENSBTAG00000010718	Ral GEF with PH domain and SH3 binding motif 2 [Source:VGNC Symbol;Acc:VGNC:33705]
16	61657545	61681733	ANGPTL1	ENSBTAG00000010719	angiopoietin like 1 [Source:VGNC Symbol;Acc:VGNC:25890]
16	61810681	61852109	FAM20B	ENSBTAG00000013999	FAM20B, glycosaminoglycan xylosylkinase [Source:VGNC Symbol;Acc:VGNC:28786]
16	61858195	61886167	TOR3A	ENSBTAG00000014006	torsin family 3 member A [Source:VGNC Symbol;Acc:VGNC:36226]
16	61897894	61992970	ABL2	ENSBTAG00000015026	ABL proto-oncogene 2, non-receptor tyrosine kinase [Source:VGNC Symbol;Acc:VGNC:50227]
16	64095722	64426026	CACNA1E	ENSBTAG00000020887	calcium voltage-gated channel subunit alpha1 E [Source:VGNC Symbol;Acc:VGNC:26675]
16	66897684	66898319	ENSBTAG00000046091	ENSBTAG00000046091
16	66960790	67142414	C16H1orf21	ENSBTAG00000038079
16	67209942	67278874	EDEM3	ENSBTAG00000019264	ER degradation enhancing alpha-mannosidase like protein 3 [Source:VGNC Symbol;Acc:VGNC:28324]
16	71149231	71153633	SYT2	ENSBTAG00000047648	synaptotagmin 2 [Source:VGNC Symbol;Acc:VGNC:35541]
16	71413974	71455068	PROX1	ENSBTAG00000010978	prospero homeobox 1 [Source:VGNC Symbol;Acc:VGNC:33369]
16	66901987	66902096	ENSBTAG00000029119	ENSBTAG00000029119
16	19094224	19094347	ENSBTAG00000043691	ENSBTAG00000043691
16	45429775	45429878	ENSBTAG00000042245	ENSBTAG00000042245
16	40328193	40328385	ENSBTAG00000045018	ENSBTAG00000045018
16	14276654	14276772	ENSBTAG00000036945	ENSBTAG00000036945
16	14336692	14336777	ENSBTAG00000044324	ENSBTAG00000044324
17	2059569	2063780	NPY2R	ENSBTAG00000016633	neuropeptide Y receptor type 2 [Source:RefSeq peptide;Acc:NP_776826]
17	4732242	4868678	ARFIP1	ENSBTAG00000008438	ADP ribosylation factor interacting protein 1 [Source:VGNC Symbol;Acc:VGNC:26067]
17	50734879	50736971	ENSBTAG00000046439	ENSBTAG00000046439
17	51645903	51648371	ENSBTAG00000034761	ENSBTAG00000034761
17	51813720	51818775	ENSBTAG00000046986	ENSBTAG00000046986
17	60900472	61145866	MED13L	ENSBTAG00000001888	mediator complex subunit 13 like [Source:VGNC Symbol;Acc:VGNC:31351]
17	66102654	66198865	ACACB	ENSBTAG00000022058	acetyl-CoA carboxylase beta [Source:VGNC Symbol;Acc:VGNC:25520]
17	66221121	66231818	UNG	ENSBTAG00000019848	uracil DNA glycosylase [Source:VGNC Symbol;Acc:VGNC:36677]
17	66234084	66239899	ALKBH2	ENSBTAG00000019846	alkB homolog 2, alpha-ketoglutarate dependent dioxygenase [Source:VGNC Symbol;Acc:VGNC:25833]
17	66239945	66263958	USP30	ENSBTAG00000019845	ubiquitin specific peptidase 30 [Source:HGNC Symbol;Acc:HGNC:20065]
17	66276572	66349821	SVOP	ENSBTAG00000018833	SV2 related protein [Source:VGNC Symbol;Acc:VGNC:35498]
17	68248980	68315653	SEZ6L	ENSBTAG00000006569	seizure related 6 homolog like [Source:VGNC Symbol;Acc:VGNC:34503]
17	50927147	50927590	ENSBTAG00000046657	ENSBTAG00000046657
17	51707859	51708401	ENSBTAG00000020532	ENSBTAG00000020532
17	4875454	4876992	TIGD4	ENSBTAG00000009161	tigger transposable element derived 4 [Source:VGNC Symbol;Acc:VGNC:35866]
18	2882156	2903093	TMEM231	ENSBTAG00000015432	Transmembrane protein 231 [Source:UniProtKB/Swiss-Prot;Acc:A7MB75]
18	2907580	2917649	GABARAPL2	ENSBTAG00000006550	GABA type A receptor associated protein like 2 [Source:VGNC Symbol;Acc:VGNC:29186]
18	2944867	2960921	ADAT1	ENSBTAG00000015669	adenosine deaminase, tRNA specific 1 [Source:VGNC Symbol;Acc:VGNC:25637]
18	2962722	2976537	KARS	ENSBTAG00000015677	lysyl-tRNA synthetase [Source:VGNC Symbol;Acc:VGNC:30396]
18	2976672	2983194	TERF2IP	ENSBTAG00000015686	TERF2 interacting protein [Source:VGNC Symbol;Acc:VGNC:50057]
18	4559081	4703601	ADAMTS18	ENSBTAG00000001010	ADAM metallopeptidase with thrombospondin type 1 motif 18 [Source:VGNC Symbol;Acc:VGNC:25622]
18	9512739	10162782	CDH13	ENSBTAG00000034373	cadherin 13 [Source:VGNC Symbol;Acc:VGNC:27093]
18	10694237	10706275	TLDC1	ENSBTAG00000000946	TBC/LysM-associated domain containing 1 [Source:VGNC Symbol;Acc:VGNC:35889]
18	10781076	10825733	COTL1	ENSBTAG00000016315	coactosin like F-actin binding protein 1 [Source:VGNC Symbol;Acc:VGNC:27626]
18	10845506	10854520	KLHL36	ENSBTAG00000008385	kelch like family member 36 [Source:VGNC Symbol;Acc:VGNC:30662]
18	45337460	45339631	ENSBTAG00000045737	ENSBTAG00000045737	androgen binding protein beta-like precursor [Source:RefSeq peptide;Acc:NP_001193735]
18	45438596	45440643	ENSBTAG00000047571	ENSBTAG00000047571
18	45562957	45564333	ENSBTAG00000047724	ENSBTAG00000047724
18	50654851	50666554	CYP2S1	ENSBTAG00000018240	cytochrome P450 2S1 precursor [Source:RefSeq peptide;Acc:NP_001093836]
18	50677199	50709510	AXL	ENSBTAG00000003166	AXL receptor tyrosine kinase [Source:VGNC Symbol;Acc:VGNC:26366]
18	50718845	50752307	HNRNPUL1	ENSBTAG00000003168	heterogeneous nuclear ribonucleoprotein U like 1 [Source:VGNC Symbol;Acc:VGNC:50035]
18	63313174	63319123	ENSBTAG00000039691	ENSBTAG00000039691
18	63349487	63355736	ENSBTAG00000005841	ENSBTAG00000005841
18	63381416	63388728	RPS9	ENSBTAG00000006487	ribosomal protein S9 [Source:VGNC Symbol;Acc:VGNC:34152]
18	63393523	63397442	TSEN34	ENSBTAG00000006486	tRNA splicing endonuclease subunit 34 [Source:VGNC Symbol;Acc:VGNC:36411]
18	63397970	63412141	MBOAT7	ENSBTAG00000015908	membrane bound O-acyltransferase domain containing 7 [Source:VGNC Symbol;Acc:VGNC:31289]
18	63412389	63421513	TMC4	ENSBTAG00000020062	transmembrane channel like 4 [Source:VGNC Symbol;Acc:VGNC:35920]
18	63421902	63425192	LENG1	ENSBTAG00000023333	leukocyte receptor cluster member 1 [Source:VGNC Symbol;Acc:VGNC:30838]
18	63425206	63435541	CNOT3	ENSBTAG00000014900	CCR4-NOT transcription complex subunit 3 [Source:VGNC Symbol;Acc:VGNC:27518]
18	63443999	63455010	PRPF31	ENSBTAG00000007757	pre-mRNA processing factor 31 [Source:VGNC Symbol;Acc:VGNC:33374]
18	2952235	2954439	ENSBTAG00000034185	ENSBTAG00000034185
18	50611276	50611827	ENSBTAG00000047196	ENSBTAG00000047196
18	50715311	50715367	bta-mir-2887-2	ENSBTAG00000047918	bta-mir-2887-1 [Source:miRBase;Acc:MI0013060]
18	50716431	50716500	bta-mir-2904-2	ENSBTAG00000048000	bta-mir-2904-3 [Source:miRBase;Acc:MI0013082]
18	50716331	50716387	bta-mir-2887-2	ENSBTAG00000047370	bta-mir-2887-1 [Source:miRBase;Acc:MI0013060]
18	50715411	50715480	bta-mir-2904-2	ENSBTAG00000045632	bta-mir-2904-3 [Source:miRBase;Acc:MI0013082]
18	50714406	50714475	bta-mir-2904-2	ENSBTAG00000045494	bta-mir-2904-3 [Source:miRBase;Acc:MI0013082]
18	45406679	45406784	ENSBTAG00000045778	ENSBTAG00000045778
18	50714306	50714362	bta-mir-2887-2	ENSBTAG00000048174	bta-mir-2887-1 [Source:miRBase;Acc:MI0013060]
19	30296519	30303510	ADPRM	ENSBTAG00000046919	ADP-ribose/CDP-alcohol diphosphatase, manganese dependent [Source:VGNC Symbol;Acc:VGNC:25692]
19	30304818	30322098	TMEM220	ENSBTAG00000003958	transmembrane protein 220 [Source:VGNC Symbol;Acc:VGNC:36042]
19	35955796	35991013	KCNJ12	ENSBTAG00000020061	potassium voltage-gated channel subfamily J member 12 [Source:HGNC Symbol;Acc:HGNC:6258]
19	36032858	36035427	ENSBTAG00000018840	ENSBTAG00000018840
19	36083620	36141993	UTP18	ENSBTAG00000020629	UTP18, small subunit processome component [Source:VGNC Symbol;Acc:VGNC:36743]
19	38697518	39001101	SKAP1	ENSBTAG00000000641	src kinase associated phosphoprotein 1 [Source:HGNC Symbol;Acc:HGNC:15605]
19	43056660	43132624	STAT3	ENSBTAG00000021523	signal transducer and activator of transcription 3 [Source:VGNC Symbol;Acc:VGNC:35371]
19	43148013	43162165	CAVIN1	ENSBTAG00000039684	caveolae associated protein 1 [Source:VGNC Symbol;Acc:VGNC:26802]
19	43201174	43251818	ATP6V0A1	ENSBTAG00000019218	ATPase H+ transporting V0 subunit a1 [Source:VGNC Symbol;Acc:VGNC:26307]
19	30400967	30401380	PIRT	ENSBTAG00000046290	phosphoinositide interacting regulator of transient receptor potential channels [Source:VGNC Symbol;Acc:VGNC:32916]
19	43226784	43226918	ENSBTAG00000046078	ENSBTAG00000046078
19	38715465	38715571	ENSBTAG00000043418	ENSBTAG00000043418
20	5226483	5238709	BOD1	ENSBTAG00000034598	biorientation of chromosomes in cell division protein 1 [Source:RefSeq peptide;Acc:NP_001069668]
20	9330175	9419040	MAP1B	ENSBTAG00000001961	microtubule associated protein 1B [Source:VGNC Symbol;Acc:VGNC:31178]
20	10154909	10201157	OCLN	ENSBTAG00000000561	occludin [Source:VGNC Symbol;Acc:VGNC:32397]
20	10244309	10265817	MARVELD2	ENSBTAG00000040001	MARVEL domain containing 2 [Source:VGNC Symbol;Acc:VGNC:31253]
20	10266268	10300200	RAD17	ENSBTAG00000002073	RAD17 checkpoint clamp loader component [Source:VGNC Symbol;Acc:VGNC:33678]
20	10300553	10314075	AK6	ENSBTAG00000046192	adenylate kinase 6 [Source:VGNC Symbol;Acc:VGNC:25775]
20	10300612	10304139	TAF9	ENSBTAG00000027980	TATA-box binding protein associated factor 9 [Source:VGNC Symbol;Acc:VGNC:35582]
20	10329064	10351647	CCDC125	ENSBTAG00000017011	coiled-coil domain containing 125 [Source:VGNC Symbol;Acc:VGNC:26841]
20	23993844	24022535	CDC20B	ENSBTAG00000021959	cell division cycle 20B [Source:VGNC Symbol;Acc:VGNC:27061]
20	24033747	24042721	GZMA	ENSBTAG00000021958	granzyme A precursor [Source:RefSeq peptide;Acc:NP_001092565]
20	24048537	24059238	gzmA	ENSBTAG00000027865	Granzyme A [Source:UniProtKB/Swiss-Prot;Acc:Q7YRZ7]
20	24097290	24107687	GZMK	ENSBTAG00000005164	granzyme K [Source:VGNC Symbol;Acc:VGNC:29733]
20	24131984	24140817	ESM1	ENSBTAG00000004221	endothelial cell specific molecule 1 [Source:VGNC Symbol;Acc:VGNC:28602]
20	32606049	32618895	FBXO4	ENSBTAG00000016981	F-box protein 4 [Source:VGNC Symbol;Acc:VGNC:28910]
20	32633116	32650605	C5orf51	ENSBTAG00000004929	chromosome 5 open reading frame 51 [Source:HGNC Symbol;Acc:HGNC:27750]
20	32683996	32848723	OXCT1	ENSBTAG00000033186	3-oxoacid CoA-transferase 1 [Source:VGNC Symbol;Acc:VGNC:32508]
20	37092892	37174619	ENSBTAG00000000586	ENSBTAG00000000586
20	37189901	37303893	NIPBL	ENSBTAG00000000579	NIPBL, cohesin loading factor [Source:VGNC Symbol;Acc:VGNC:32085]
20	56295179	56572213	MYO10	ENSBTAG00000020126	myosin X [Source:VGNC Symbol;Acc:VGNC:31811]
20	56709603	56758641	RETREG1	ENSBTAG00000016444	reticulophagy regulator 1 [Source:VGNC Symbol;Acc:VGNC:33878]
20	18198000	18198163	RF00003	ENSBTAG00000047951
20	18039373	18039433	bta-mir-2889	ENSBTAG00000046856	bta-mir-2889 [Source:miRBase;Acc:MI0013064]
21	9617226	9635374	ENSBTAG00000046611	ENSBTAG00000046611
21	26449626	26466916	MTHFS	ENSBTAG00000020023
21	26481215	26490869	BCL2A1	ENSBTAG00000000735	Bcl-2-related protein A1 [Source:UniProtKB/Swiss-Prot;Acc:Q3C2I0]
21	26543823	26591580	ZFAND6	ENSBTAG00000012321	AN1-type zinc finger protein 6 [Source:RefSeq peptide;Acc:NP_001029632]
21	27448604	27470396	CFAP161	ENSBTAG00000011861	cilia and flagella associated protein 161 [Source:VGNC Symbol;Acc:VGNC:27239]
21	27527684	27606711	IL16	ENSBTAG00000010963	interleukin 16 [Source:HGNC Symbol;Acc:HGNC:5980]
21	27608609	27617253	STARD5	ENSBTAG00000010964	StAR related lipid transfer domain containing 5 [Source:VGNC Symbol;Acc:VGNC:35366]
21	27629653	27683112	TMC3	ENSBTAG00000012166	transmembrane channel like 3 [Source:VGNC Symbol;Acc:VGNC:35919]
21	27897958	27905993	MCEE	ENSBTAG00000035247	methylmalonyl-CoA epimerase [Source:VGNC Symbol;Acc:VGNC:31300]
21	27906719	27919029	MPHOSPH10	ENSBTAG00000009854	M-phase phosphoprotein 10 [Source:VGNC Symbol;Acc:VGNC:31573]
21	27922210	27945107	FAN1	ENSBTAG00000009855	FANCD2 and FANCI associated nuclease 1 [Source:VGNC Symbol;Acc:VGNC:28851]
21	27947773	27984436	MTMR10	ENSBTAG00000014422	myotubularin related protein 10 [Source:VGNC Symbol;Acc:VGNC:31737]
21	27993518	28055083	TRPM1	ENSBTAG00000001639	transient receptor potential cation channel subfamily M member 1 [Source:VGNC Symbol;Acc:VGNC:36388]
21	30835151	30897314	ADAMTS7	ENSBTAG00000001396	ADAM metallopeptidase with thrombospondin type 1 motif 7 [Source:HGNC Symbol;Acc:HGNC:223]
21	30902155	30968114	TBC1D2B	ENSBTAG00000012022	TBC1 domain family member 2B [Source:VGNC Symbol;Acc:VGNC:35640]
21	30998214	31006059	SH2D7	ENSBTAG00000047166	SH2 domain containing 7 [Source:VGNC Symbol;Acc:VGNC:34562]
21	31017716	31023825	CIB2	ENSBTAG00000010981	calcium and integrin binding family member 2 [Source:VGNC Symbol;Acc:VGNC:27360]
21	31063699	31079936	IDH3A	ENSBTAG00000006227	isocitrate dehydrogenase [Source:RefSeq peptide;Acc:NP_777069]
21	31081077	31140268	ACSBG1	ENSBTAG00000006231	acyl-CoA synthetase bubblegum family member 1 [Source:VGNC Symbol;Acc:VGNC:25560]
21	37109671	37273808	NOVA1	ENSBTAG00000002170	NOVA alternative splicing regulator 1 [Source:HGNC Symbol;Acc:HGNC:7886]
21	40528795	40682810	PRKD1	ENSBTAG00000012789	protein kinase D1 [Source:HGNC Symbol;Acc:HGNC:9407]
21	43132861	43630707	AKAP6	ENSBTAG00000017719	A-kinase anchoring protein 6 [Source:VGNC Symbol;Acc:VGNC:25787]
21	44674273	44703824	NPAS3	ENSBTAG00000004462	neuronal PAS domain protein 3 [Source:HGNC Symbol;Acc:HGNC:19311]
21	45354862	45371985	EAPP	ENSBTAG00000003419	E2F associated phosphoprotein [Source:VGNC Symbol;Acc:VGNC:28296]
21	45418669	45454655	SNX6	ENSBTAG00000012873	sorting nexin 6 [Source:VGNC Symbol;Acc:VGNC:35112]
21	45486926	45487620	ENSBTAG00000015143	ENSBTAG00000015143
21	46916937	46935846	MBIP	ENSBTAG00000009941	MAP3K12 binding inhibitory protein 1 [Source:VGNC Symbol;Acc:VGNC:31279]
21	49489517	49555507	SEC23A	ENSBTAG00000003708	Sec23 homolog A, coat complex II component [Source:VGNC Symbol;Acc:VGNC:34410]
21	49526702	49532179	ENSBTAG00000048042	ENSBTAG00000048042
21	49571621	49593136	GEMIN2	ENSBTAG00000020930	gem nuclear organelle associated protein 2 [Source:VGNC Symbol;Acc:VGNC:29316]
21	49597596	49608630	TRAPPC6B	ENSBTAG00000015023	trafficking protein particle complex 6B [Source:VGNC Symbol;Acc:VGNC:36293]
21	49612519	49618556	PNN	ENSBTAG00000026995	pinin, desmosome associated protein [Source:VGNC Symbol;Acc:VGNC:33087]
21	49637067	49648037	ENSBTAG00000045986	ENSBTAG00000045986
21	49665666	49738270	ENSBTAG00000006819	ENSBTAG00000006819
21	50322855	50324578	ENSBTAG00000017924	ENSBTAG00000017924
21	50392543	50393631	ENSBTAG00000009980	ENSBTAG00000009980
21	56048992	56091578	FRMD5	ENSBTAG00000017216	FERM domain containing 5 [Source:VGNC Symbol;Acc:VGNC:29116]
21	58679832	58924124	UNC79	ENSBTAG00000008017	unc-79 homolog, NALCN channel complex subunit [Source:VGNC Symbol;Acc:VGNC:36675]
21	58949073	59007741	PRIMA1	ENSBTAG00000015880	proline rich membrane anchor 1 [Source:HGNC Symbol;Acc:HGNC:18319]
21	70313782	70351845	KIF26A	ENSBTAG00000021904	kinesin family member 26A [Source:HGNC Symbol;Acc:HGNC:20226]
21	20502554	20503402	ENSBTAG00000001526	ENSBTAG00000001526
21	20561687	20562583	ENSBTAG00000046377	ENSBTAG00000046377
21	20573087	20573983	ENSBTAG00000046412	ENSBTAG00000046412
21	40890193	40890804	ENSBTAG00000027863	ENSBTAG00000027863
21	40604219	40604336	ENSBTAG00000045322	ENSBTAG00000045322
21	45400518	45400676	ENSBTAG00000028419	ENSBTAG00000028419
21	49192781	49192874	ENSBTAG00000044793	ENSBTAG00000044793
21	45378250	45378413	ENSBTAG00000046113	ENSBTAG00000046113
21	45387109	45387272	ENSBTAG00000037013	ENSBTAG00000037013
21	45415304	45415467	ENSBTAG00000045508	ENSBTAG00000045508
21	28046409	28046518	bta-mir-211	ENSBTAG00000036407	bta-mir-211 [Source:miRBase;Acc:MI0009775]
21	3611984	3612057	ENSBTAG00000047865	ENSBTAG00000047865	small nucleolar RNA, C/D box 107 [Source:HGNC Symbol;Acc:HGNC:32771]
21	45406961	45407124	ENSBTAG00000047504	ENSBTAG00000047504
21	45436286	45436507	ENSBTAG00000037179	ENSBTAG00000037179
21	65162861	65162967	ENSBTAG00000042869	ENSBTAG00000042869
21	56158815	56158888	ENSBTAG00000042421	ENSBTAG00000042421
22	10379811	10490263	LRRFIP2	ENSBTAG00000016760	LRR binding FLII interacting protein 2 [Source:VGNC Symbol;Acc:VGNC:31035]
22	16694678	16750676	IRAK2	ENSBTAG00000006193	interleukin 1 receptor associated kinase 2 [Source:VGNC Symbol;Acc:VGNC:30266]
22	16760055	16764930	VHL	ENSBTAG00000016101
22	16769773	16777323	BRK1	ENSBTAG00000016098	BRICK1, SCAR/WAVE actin nucleating complex subunit [Source:VGNC Symbol;Acc:VGNC:26570]
22	16779264	16782524	FANCD2OS	ENSBTAG00000010094	FANCD2 opposite strand protein [Source:UniProtKB/Swiss-Prot;Acc:Q32KZ5]
22	16783190	16832321	FANCD2	ENSBTAG00000010077	Fanconi anemia complementation group D2 [Source:VGNC Symbol;Acc:VGNC:28855]
22	16833933	16848259	EMC3	ENSBTAG00000003882	ER membrane protein complex subunit 3 [Source:VGNC Symbol;Acc:VGNC:28464]
23	8084930	8188237	GRM4	ENSBTAG00000013632	glutamate metabotropic receptor 4 [Source:HGNC Symbol;Acc:HGNC:4596]
23	8537368	8554696	SPDEF	ENSBTAG00000021993	SAM pointed domain containing ETS transcription factor [Source:VGNC Symbol;Acc:VGNC:35198]
23	8591963	8688924	C23H6orf106	ENSBTAG00000034493	chromosome 6 open reading frame 106 [Source:HGNC Symbol;Acc:HGNC:21215]
23	19892715	19904104	TDRD6	ENSBTAG00000009978	tudor domain containing 6 [Source:VGNC Symbol;Acc:VGNC:35720]
23	19907160	19945051	PLA2G7	ENSBTAG00000019315	phospholipase A2 group VII [Source:VGNC Symbol;Acc:VGNC:32965]
23	19953077	19966930	ANKRD66	ENSBTAG00000047009	ankyrin repeat domain 66 [Source:VGNC Symbol;Acc:VGNC:25942]
23	20014170	20040232	MEP1A	ENSBTAG00000004345	meprin A subunit alpha [Source:VGNC Symbol;Acc:VGNC:31388]
23	20893701	21091299	PTCHD4	ENSBTAG00000021415	patched domain containing 4 [Source:HGNC Symbol;Acc:HGNC:21345]
23	23795772	24250799	PKHD1	ENSBTAG00000011237	PKHD1, fibrocystin/polyductin [Source:VGNC Symbol;Acc:VGNC:32939]
23	25351283	25356959	BOLA-DQA2	ENSBTAG00000009656	Bos taurus major histocompatibility complex, class II, DQ alpha 2 (BOLA-DQA2), mRNA. [Source:RefSeq mRNA;Acc:NM_001012681]
23	25375270	25388620	BOLA-DQB	ENSBTAG00000021077
23	25404020	25411643	BOLA-DQA5	ENSBTAG00000038128
23	25423551	25424597	ENSBTAG00000003352	ENSBTAG00000003352
23	25426330	25430097	ENSBTAG00000037605	ENSBTAG00000037605
23	25458594	25476944	BOLA-DRB3	ENSBTAG00000013919
23	25966734	25980368	ENSBTAG00000033979	ENSBTAG00000033979
23	26354054	26354780	ENSBTAG00000026163	ENSBTAG00000026163
23	27600055	27604052	ENSBTAG00000008959	ENSBTAG00000008959
23	27647069	27652297	BoLA	ENSBTAG00000005182	Bos taurus major histocompatibility complex, class I, A (BoLA), mRNA. [Source:RefSeq mRNA;Acc:NM_001114855]
23	27659363	27729750	MIC1	ENSBTAG00000010166	major histocompatibility class I related protein precursor [Source:RefSeq peptide;Acc:NP_001120789]
23	27689369	27692407	ENSBTAG00000012208	ENSBTAG00000012208
23	27715023	27718202	ENSBTAG00000001476	ENSBTAG00000001476
23	47670503	47714288	DSP	ENSBTAG00000015106	desmoplakin [Source:VGNC Symbol;Acc:VGNC:28225]
23	47789367	47806517	RIOK1	ENSBTAG00000013821	RIO kinase 1 [Source:VGNC Symbol;Acc:VGNC:50051]
23	47811698	47846185	CAGE1	ENSBTAG00000014587	cancer antigen 1 [Source:HGNC Symbol;Acc:HGNC:21622]
23	50077253	50095625	PXDC1	ENSBTAG00000026919	PX domain containing 1 [Source:VGNC Symbol;Acc:VGNC:33582]
23	50234185	50323825	SLC22A23	ENSBTAG00000010943	solute carrier family 22 member 23 [Source:HGNC Symbol;Acc:HGNC:21106]
23	51117008	51453402	GMDS	ENSBTAG00000012058	GDP-mannose 4,6 dehydratase [Source:RefSeq peptide;Acc:NP_001073800]
23	51549721	51553563	FOXF2	ENSBTAG00000026896	forkhead box F2 [Source:VGNC Symbol;Acc:VGNC:29085]
23	27646134	27646571	ENSBTAG00000031905	ENSBTAG00000031905
23	27614103	27615194	ENSBTAG00000031913	ENSBTAG00000031913
23	8607362	8607480	ENSBTAG00000029474	ENSBTAG00000029474
23	51686148	51686257	ENSBTAG00000043725	ENSBTAG00000043725
24	4515594	4521309	TIMM21	ENSBTAG00000009687	translocase of inner mitochondrial membrane 21 [Source:VGNC Symbol;Acc:VGNC:49574]
24	4521978	4559648	FBXO15	ENSBTAG00000009686	F-box protein 15 [Source:VGNC Symbol;Acc:VGNC:28893]
24	7303047	7304704	SOCS6	ENSBTAG00000017412	suppressor of cytokine signaling 6 [Source:VGNC Symbol;Acc:VGNC:35124]
24	7401048	7519745	RTTN	ENSBTAG00000013221	rotatin [Source:VGNC Symbol;Acc:VGNC:34211]
24	12747969	12765314	ENSBTAG00000023026	ENSBTAG00000023026
24	35630929	35816269	COLEC12	ENSBTAG00000007705	collectin subfamily member 12 [Source:VGNC Symbol;Acc:VGNC:27579]
24	46885279	46907902	ST8SIA5	ENSBTAG00000001770	alpha-2,8-sialyltransferase 8E [Source:RefSeq peptide;Acc:NP_001179803]
24	46997481	47063075	ENSBTAG00000007833	ENSBTAG00000007833
24	47971047	48022060	SMAD2	ENSBTAG00000039916	SMAD family member 2 [Source:VGNC Symbol;Acc:VGNC:34975]
24	55056433	55435276	TCF4	ENSBTAG00000016462	transcription factor 4 [Source:VGNC Symbol;Acc:VGNC:35694]
24	56404067	56446678	TXNL1	ENSBTAG00000015731	thioredoxin like 1 [Source:VGNC Symbol;Acc:VGNC:36542]
24	56467338	56817379	WDR7	ENSBTAG00000004005	WD repeat domain 7 [Source:VGNC Symbol;Acc:VGNC:36914]
24	62319472	62329373	SERPINB12	ENSBTAG00000035171	serpin family B member 12 [Source:VGNC Symbol;Acc:VGNC:34471]
24	62340435	62350499	SERPINB13	ENSBTAG00000035182	serpin family B member 13 [Source:VGNC Symbol;Acc:VGNC:34472]
24	62364703	62384881	SERPINB4	ENSBTAG00000039037	Bos taurus serpin peptidase inhibitor, clade B like (LOC786410), mRNA. [Source:RefSeq mRNA;Acc:NM_001206713]
24	62379392	62384881	ENSBTAG00000037608	ENSBTAG00000037608
24	62394583	62406502	ENSBTAG00000037554	ENSBTAG00000037554
24	62427625	62451599	ENSBTAG00000035224	ENSBTAG00000035224
24	62440124	62451599	ENSBTAG00000040586	ENSBTAG00000040586	serpin peptidase inhibitor, clade B like [Source:RefSeq peptide;Acc:NP_001099089]
24	12798435	12798827	ENSBTAG00000034656	ENSBTAG00000034656
24	35870001	35870886	CETN1	ENSBTAG00000012320	centrin 1 [Source:VGNC Symbol;Acc:VGNC:27233]
24	12878019	12878100	ENSBTAG00000039565	ENSBTAG00000039565
25	14469282	14570639	ABCC1	ENSBTAG00000021090	ATP binding cassette subfamily C member 1 [Source:VGNC Symbol;Acc:VGNC:25468]
25	14577546	14643306	ABCC6	ENSBTAG00000015191	ATP binding cassette subfamily C member 6 [Source:VGNC Symbol;Acc:VGNC:50200]
25	14646656	14702742	ENSBTAG00000017759	ENSBTAG00000017759
25	20685205	20800341	HS3ST2	ENSBTAG00000017391	heparan sulfate-glucosamine 3-sulfotransferase 2 [Source:VGNC Symbol;Acc:VGNC:29959]
26	5017714	5578654	PCDH15	ENSBTAG00000045905	protocadherin related 15 [Source:VGNC Symbol;Acc:VGNC:32617]
26	12250737	12252652	ENSBTAG00000034597	ENSBTAG00000034597
26	12376625	12513781	HTR7	ENSBTAG00000008783	5-hydroxytryptamine receptor 7 [Source:VGNC Symbol;Acc:VGNC:30003]
26	12531280	12559200	RPP30	ENSBTAG00000002973	ribonuclease P/MRP subunit p30 [Source:VGNC Symbol;Acc:VGNC:34123]
26	12571209	12580580	ANKRD1	ENSBTAG00000011734	ankyrin repeat domain 1 [Source:VGNC Symbol;Acc:VGNC:25908]
26	16721039	16919269	SORBS1	ENSBTAG00000002880	sorbin and SH3 domain-containing protein 1 [Source:RefSeq peptide;Acc:NP_001068637]
26	22001775	22172725	BTRC	ENSBTAG00000007476	beta-transducin repeat containing E3 ubiquitin protein ligase [Source:VGNC Symbol;Acc:VGNC:26603]
26	25944197	25958640	TUBGCP2	ENSBTAG00000006395	tubulin gamma complex associated protein 2 [Source:VGNC Symbol;Acc:VGNC:36512]
26	25960809	25972557	ADAM8	ENSBTAG00000023832	ADAM metallopeptidase domain 8 [Source:VGNC Symbol;Acc:VGNC:25612]
26	26000425	26001359	UTF1	ENSBTAG00000024999	undifferentiated embryonic cell transcription factor 1 [Source:HGNC Symbol;Acc:HGNC:12634]
26	34304685	34340148	HABP2	ENSBTAG00000019322	Hyaluronan-binding protein 2 Hyaluronan-binding protein 2 50 kDa heavy chain Hyaluronan-binding protein 2 50 kDa heavy chain alternate form Hyaluronan-binding protein 2 27 kDa light chain Hyaluronan-binding protein 2 27 kDa light chain alternate form [Source:UniProtKB/Swiss-Prot;Acc:Q5E9Z2]
26	34339430	34414796	NRAP	ENSBTAG00000019327	nebulin related anchoring protein [Source:VGNC Symbol;Acc:VGNC:32251]
26	37073738	37131447	CCDC172	ENSBTAG00000032299	coiled-coil domain containing 172 [Source:VGNC Symbol;Acc:VGNC:26869]
26	37192556	37223786	PNLIPRP3	ENSBTAG00000019690	pancreatic lipase related protein 3 [Source:VGNC Symbol;Acc:VGNC:33083]
26	40041404	40060834	TIAL1	ENSBTAG00000004080	TIA1 cytotoxic granule associated RNA binding protein like 1 [Source:VGNC Symbol;Acc:VGNC:35859]
26	40118556	40141989	BAG3	ENSBTAG00000013641	BCL2 associated athanogene 3 [Source:VGNC Symbol;Acc:VGNC:26407]
26	47635451	47651856	CLRN3	ENSBTAG00000047054	clarin 3 [Source:VGNC Symbol;Acc:VGNC:27464]
26	47801368	47842727	PTPRE	ENSBTAG00000002435	protein tyrosine phosphatase, receptor type E [Source:VGNC Symbol;Acc:VGNC:33549]
26	5312988	5313106	ENSBTAG00000035041	ENSBTAG00000035041
26	3999124	3999191	ENSBTAG00000048299	ENSBTAG00000048299
26	12253102	12253155	ENSBTAG00000045230	ENSBTAG00000045230
26	12325286	12325402	ENSBTAG00000046863	ENSBTAG00000046863
26	25988240	25988338	bta-mir-202	ENSBTAG00000030055	bta-mir-202 [Source:miRBase;Acc:MI0009771]
27	1019178	1424171	CSMD1	ENSBTAG00000009739	CUB and Sushi multiple domains 1 [Source:HGNC Symbol;Acc:HGNC:14026]
27	13499304	13690638	STOX2	ENSBTAG00000008886	storkhead box 2 [Source:VGNC Symbol;Acc:VGNC:35415]
27	13749508	13826909	ENPP6	ENSBTAG00000011573	ectonucleotide pyrophosphatase/phosphodiesterase 6 [Source:VGNC Symbol;Acc:VGNC:28507]
27	14906506	15022818	SORBS2	ENSBTAG00000016486
27	28406557	28416649	MAK16	ENSBTAG00000033504	MAK16 homolog [Source:VGNC Symbol;Acc:VGNC:31153]
27	28415997	28427209	TTI2	ENSBTAG00000015463	TELO2 interacting protein 2 [Source:VGNC Symbol;Acc:VGNC:36486]
27	28450185	28459083	RNF122	ENSBTAG00000016411	ring finger protein 122 [Source:VGNC Symbol;Acc:VGNC:34015]
27	34249449	34353369	ADAM2	ENSBTAG00000009408	disintegrin and metalloproteinase domain-containing protein 2 precursor [Source:RefSeq peptide;Acc:NP_776653]
27	34367778	34483222	ADAM3A	ENSBTAG00000033312	ADAM metallopeptidase domain 3A (cyritestin 1) precursor [Source:RefSeq peptide;Acc:NP_001091635]
27	36295590	36355927	ANK1	ENSBTAG00000003275	ankyrin 1 [Source:HGNC Symbol;Acc:HGNC:492]
27	36532982	36636049	KAT6A	ENSBTAG00000004015	lysine acetyltransferase 6A [Source:VGNC Symbol;Acc:VGNC:30401]
27	37195913	37209034	CHRNA6	ENSBTAG00000014056	cholinergic receptor nicotinic alpha 6 subunit [Source:VGNC Symbol;Acc:VGNC:27328]
27	37234389	37240538	THAP1	ENSBTAG00000007629	THAP domain containing 1 [Source:VGNC Symbol;Acc:VGNC:35818]
27	37246976	37271896	RNF170	ENSBTAG00000007630	ring finger protein 170 [Source:VGNC Symbol;Acc:VGNC:34036]
27	37278344	37358417	HOOK3	ENSBTAG00000007634	hook microtubule tethering protein 3 [Source:VGNC Symbol;Acc:VGNC:50090]
27	23856777	23857658	CLDN23	ENSBTAG00000007051	claudin 23 [Source:VGNC Symbol;Acc:VGNC:27412]
27	36622575	36622681	ENSBTAG00000042937	ENSBTAG00000042937
27	28427578	28427682	ENSBTAG00000046759	ENSBTAG00000046759
27	36313187	36313272	ENSBTAG00000048178	ENSBTAG00000048178
27	1330181	1330256	ENSBTAG00000046371	ENSBTAG00000046371
28	8340143	8408741	GNG4	ENSBTAG00000002908	G protein subunit gamma 4 [Source:VGNC Symbol;Acc:VGNC:29467]
28	8423715	8567655	LYST	ENSBTAG00000016804	lysosomal trafficking regulator [Source:VGNC Symbol;Acc:VGNC:31115]
28	29878540	29930559	CAMK2G	ENSBTAG00000012667	calcium/calmodulin-dependent protein kinase type II subunit gamma [Source:RefSeq peptide;Acc:NP_001091033]
28	29964983	29971029	PLAU	ENSBTAG00000005947	plasminogen activator, urokinase [Source:VGNC Symbol;Acc:VGNC:32975]
28	35032455	35142181	ZMIZ1	ENSBTAG00000019313	zinc finger MIZ-type containing 1 [Source:VGNC Symbol;Acc:VGNC:37195]
28	35167545	35173642	PPIF	ENSBTAG00000016711	peptidylprolyl isomerase F [Source:VGNC Symbol;Acc:VGNC:33198]
28	35189622	35251005	ZCCHC24	ENSBTAG00000003877	zinc finger CCHC-type containing 24 [Source:HGNC Symbol;Acc:HGNC:26911]
28	41492640	41565133	WAPL	ENSBTAG00000012213	WAPL cohesin release factor [Source:VGNC Symbol;Acc:VGNC:36862]
28	41644490	41654402	OPN4	ENSBTAG00000032800	opsin 4 [Source:VGNC Symbol;Acc:VGNC:32437]
28	41657195	41713873	LDB3	ENSBTAG00000018707	LIM domain binding 3 [Source:VGNC Symbol;Acc:VGNC:30823]
28	30008049	30008387	ENSBTAG00000048036	ENSBTAG00000048036
28	30009324	30009656	ENSBTAG00000046355	ENSBTAG00000046355
28	29983513	29983606	ENSBTAG00000040601	ENSBTAG00000040601
29	6147990	6326526	NOX4	ENSBTAG00000018540	NADPH oxidase 4 [Source:VGNC Symbol;Acc:VGNC:32184]
29	17048263	17489455	TENM4	ENSBTAG00000007439	teneurin transmembrane protein 4 [Source:VGNC Symbol;Acc:VGNC:35744]
29	30128441	30218950	KIRREL3	ENSBTAG00000006804	kin of IRRE-like protein 3 precursor [Source:RefSeq peptide;Acc:NP_001071553]
29	35154689	35575203	NTM	ENSBTAG00000010032	neurotrimin [Source:VGNC Symbol;Acc:VGNC:32302]
29	39261026	39270024	PAG19	ENSBTAG00000046398	pregnancy-associated glycoprotein 19 precursor [Source:RefSeq peptide;Acc:NP_788801]
29	39326703	39397241	ENSBTAG00000047419	ENSBTAG00000047419
29	39345959	39355136	ENSBTAG00000034244	ENSBTAG00000034244
29	39390100	39397241	ENSBTAG00000048073	ENSBTAG00000048073
29	42890800	43092842	MACROD1	ENSBTAG00000017181	O-acetyl-ADP-ribose deacetylase MACROD1 [Source:UniProtKB/Swiss-Prot;Acc:Q2KHU5]
29	43008119	43008581	ENSBTAG00000006386	ENSBTAG00000006386
29	43032947	43044726	NAA40	ENSBTAG00000003073	N(alpha)-acetyltransferase 40, NatD catalytic subunit [Source:HGNC Symbol;Acc:HGNC:25845]
29	43111546	43124096	STIP1	ENSBTAG00000015663	Stress-induced-phosphoprotein 1 [Source:UniProtKB/Swiss-Prot;Acc:Q3ZBZ8]
29	43126404	43142481	FERMT3	ENSBTAG00000045862	fermitin family homolog 3 [Source:RefSeq peptide;Acc:NP_001032695]
29	43142908	43146183	DNAJC4	ENSBTAG00000016560	DnaJ heat shock protein family (Hsp40) member C4 [Source:HGNC Symbol;Acc:HGNC:5271]
29	43146856	43149460	NUDT22	ENSBTAG00000016559	nudix hydrolase 22 [Source:VGNC Symbol;Acc:VGNC:32337]
29	43149610	43152143	TRPT1	ENSBTAG00000016555	tRNA phosphotransferase 1 [Source:VGNC Symbol;Acc:VGNC:36396]
29	51036147	51077863	LMNTD2	ENSBTAG00000047713	lamin tail domain containing 2 [Source:HGNC Symbol;Acc:HGNC:28561]
29	51057469	51115452	BRSK2	ENSBTAG00000017861	BR serine/threonine kinase 2 [Source:HGNC Symbol;Acc:HGNC:11405]
29	51078395	51091214	LRRC56	ENSBTAG00000048263	leucine rich repeat containing 56 [Source:VGNC Symbol;Acc:VGNC:31023]
29	51095370	51098281	HRAS	ENSBTAG00000046644	HRas proto-oncogene, GTPase [Source:VGNC Symbol;Acc:VGNC:29951]
29	51208026	51216725	ENSBTAG00000047697	ENSBTAG00000047697
29	51265567	51271520	SIGIRR	ENSBTAG00000011149	single Ig and TIR domain containing [Source:VGNC Symbol;Acc:VGNC:34616]
29	51272554	51279442	PKP3	ENSBTAG00000048098	plakophilin 3 [Source:VGNC Symbol;Acc:VGNC:32951]
29	51291089	51345808	B4GALNT4	ENSBTAG00000024814	beta-1,4-N-acetyl-galactosaminyltransferase 4 [Source:HGNC Symbol;Acc:HGNC:26315]
29	43048588	43050621	FLRT1	ENSBTAG00000048264	fibronectin leucine rich transmembrane protein 1 [Source:VGNC Symbol;Acc:VGNC:29038]
29	272264	273010	ENSBTAG00000046335	ENSBTAG00000046335
29	51051771	51051846	bta-mir-2410	ENSBTAG00000045040	bta-mir-2410 [Source:miRBase;Acc:MI0011453]

## Sheet: S7
Supplemenatry Table S7 | List of candidate selection signatures regions and related genes in Holstein based on iHS test
Chr	Gene start (bp)	Gene end (bp)	Gene name	Gene stable ID	Gene description
1	1467704	1496151	IFNAR1	ENSBTAG00000021819	interferon alpha and beta receptor subunit 1 [Source:VGNC Symbol;Acc:VGNC:30054]
1	1563137	1591758	IL10RB	ENSBTAG00000019404	interleukin-10 receptor subunit beta precursor [Source:RefSeq peptide;Acc:NP_001070443]
1	1593295	1627137	IFNAR2	ENSBTAG00000015212	interferon alpha and beta receptor subunit 2 [Source:VGNC Symbol;Acc:VGNC:30055]
1	109821738	110273727	RSRC1	ENSBTAG00000031561	Serine/Arginine-related protein 53 [Source:UniProtKB/Swiss-Prot;Acc:Q2T9Y0]
1	109955679	109956783	ENSBTAG00000047963	ENSBTAG00000047963
1	110023857	110026785	ENSBTAG00000047570	ENSBTAG00000047570
1	119437952	119583580	WWTR1	ENSBTAG00000007814	WW domain containing transcription regulator 1 [Source:VGNC Symbol;Acc:VGNC:36980]
1	119603878	119631566	TM4SF4	ENSBTAG00000001893	transmembrane 4 L six family member 4 [Source:VGNC Symbol;Acc:VGNC:35906]
1	120714267	120714944	ENSBTAG00000046008	ENSBTAG00000046008
1	145031789	145041320	SUMO3	ENSBTAG00000017321	Small ubiquitin-related modifier 3 [Source:UniProtKB/Swiss-Prot;Acc:Q17QV3]
1	150360988	150386586	CHAF1B	ENSBTAG00000011880	chromatin assembly factor 1 subunit B [Source:VGNC Symbol;Acc:VGNC:27267]
1	150439867	150440580	CLDN14	ENSBTAG00000030585	claudin 14 [Source:HGNC Symbol;Acc:HGNC:2035]
2	23644876	23974945	RAPGEF4	ENSBTAG00000020984	Rap guanine nucleotide exchange factor 4 [Source:VGNC Symbol;Acc:VGNC:33725]
2	24067475	24107467	PDK1	ENSBTAG00000016836	pyruvate dehydrogenase kinase 1 [Source:VGNC Symbol;Acc:VGNC:32703]
2	85136811	85285250	HECW2	ENSBTAG00000020696	HECT, C2 and WW domain containing E3 ubiquitin protein ligase 2 [Source:HGNC Symbol;Acc:HGNC:29853]
2	89699124	89771871	AOX4	ENSBTAG00000038878	Bos taurus aldehyde oxidase 1-like (AOX4), mRNA. [Source:RefSeq mRNA;Acc:NM_001281919]
2	89783382	89858016	ENSBTAG00000026812	ENSBTAG00000026812
2	89886720	89897574	BZW1	ENSBTAG00000006049	basic leucine zipper and W2 domains 1 [Source:VGNC Symbol;Acc:VGNC:26612]
2	89920586	89927819	CLK1	ENSBTAG00000005408	CDC like kinase 1 [Source:VGNC Symbol;Acc:VGNC:27448]
2	89936349	89943891	PPIL3	ENSBTAG00000005416	peptidylprolyl isomerase like 3 [Source:VGNC Symbol;Acc:VGNC:33203]
2	89948475	89963535	NIF3L1	ENSBTAG00000018282	NGG1 interacting factor 3 like 1 [Source:VGNC Symbol;Acc:VGNC:32075]
2	120845481	120848463	ENSBTAG00000016748	ENSBTAG00000016748
2	120869240	120871886	ENSBTAG00000039346	ENSBTAG00000039346
2	120904601	120907738	ALPI	ENSBTAG00000004519	Bos taurus alkaline phosphatase, intestinal (ALPI), mRNA. [Source:RefSeq mRNA;Acc:NM_173987]
2	120910019	120913882	ENSBTAG00000012363	ENSBTAG00000012363	alkaline phosphatase-like precursor [Source:RefSeq peptide;Acc:NP_001096792]
2	120925717	120933239	ECEL1	ENSBTAG00000021050	endothelin converting enzyme like 1 [Source:VGNC Symbol;Acc:VGNC:28304]
2	122233943	122257545	KHDRBS1	ENSBTAG00000012497	KH RNA binding domain containing, signal transduction associated 1 [Source:VGNC Symbol;Acc:VGNC:30540]
2	122350144	122359897	PTP4A2	ENSBTAG00000039121	protein tyrosine phosphatase type IVA, member 2 [Source:VGNC Symbol;Acc:VGNC:33524]
2	122723225	122783830	FABP3	ENSBTAG00000016819	fatty acid binding protein 3 [Source:VGNC Symbol;Acc:VGNC:28697]
2	122742371	122756595	ENSBTAG00000039994	ENSBTAG00000039994
2	122784558	122889605	ZCCHC17	ENSBTAG00000016818
2	122814786	122817735	SERINC2	ENSBTAG00000011582	serine incorporator 2 [Source:RefSeq peptide;Acc:NP_001030362]
2	122824336	122835401	ENSBTAG00000035081	ENSBTAG00000035081
2	122889872	122915674	SNRNP40	ENSBTAG00000016817	small nuclear ribonucleoprotein U5 subunit 40 [Source:VGNC Symbol;Acc:VGNC:35071]
2	123350418	123376541	LAPTM5	ENSBTAG00000005477	lysosomal protein transmembrane 5 [Source:VGNC Symbol;Acc:VGNC:30788]
2	123392015	123401324	MATN1	ENSBTAG00000003479	matrilin 1, cartilage matrix protein [Source:VGNC Symbol;Acc:VGNC:31264]
2	125014818	125113212	EPB41	ENSBTAG00000006667	erythrocyte membrane protein band 4.1 [Source:VGNC Symbol;Acc:VGNC:28519]
2	125213837	125255802	OPRD1	ENSBTAG00000003202	opioid receptor delta 1 [Source:VGNC Symbol;Acc:VGNC:50539]
2	125343515	125370269	GMEB1	ENSBTAG00000001160	glucocorticoid modulatory element binding protein 1 [Source:VGNC Symbol;Acc:VGNC:29432]
2	125394311	125418237	TAF12	ENSBTAG00000026660	Transcription initiation factor TFIID subunit 12 [Source:UniProtKB/Swiss-Prot;Acc:Q3T174]
2	125426086	125427402	ENSBTAG00000021525	ENSBTAG00000021525
2	125434927	125438150	ENSBTAG00000048228	ENSBTAG00000048228
2	125439385	125462744	TRNAU1AP	ENSBTAG00000010393	tRNA selenocysteine 1-associated protein 1 [Source:UniProtKB/Swiss-Prot;Acc:Q1RMJ7]
2	125468461	125475905	RCC1	ENSBTAG00000003788	regulator of chromosome condensation 1 [Source:VGNC Symbol;Acc:VGNC:33825]
2	128137418	128203726	MACO1	ENSBTAG00000002988	macoilin 1 [Source:VGNC Symbol;Acc:VGNC:36098]
2	128213651	128254607	ENSBTAG00000001297	ENSBTAG00000001297	rhesus-like protein [Source:RefSeq peptide;Acc:NP_777137]
2	128256214	128272007	TMEM50A	ENSBTAG00000001296	transmembrane protein 50A [Source:VGNC Symbol;Acc:VGNC:36092]
2	128302962	128306994	RSRP1	ENSBTAG00000015222	arginine and serine rich protein 1 [Source:VGNC Symbol;Acc:VGNC:50105]
2	128320057	128325052	SYF2	ENSBTAG00000001651	SYF2 pre-mRNA splicing factor [Source:VGNC Symbol;Acc:VGNC:35512]
2	128710453	128783921	CLIC4	ENSBTAG00000009470	chloride intracellular channel 4 [Source:VGNC Symbol;Acc:VGNC:27442]
2	128848938	128877230	SRRM1	ENSBTAG00000013772	serine and arginine repetitive matrix 1 [Source:VGNC Symbol;Acc:VGNC:35294]
2	129388770	129437616	MYOM3	ENSBTAG00000014885	myomesin 3 [Source:VGNC Symbol;Acc:VGNC:31839]
2	129501943	129502611	ENSBTAG00000048024	ENSBTAG00000048024
2	129522680	129534734	SRSF10	ENSBTAG00000008072	serine and arginine rich splicing factor 10 [Source:VGNC Symbol;Acc:VGNC:35298]
2	129536933	129540976	PNRC2	ENSBTAG00000030435	proline rich nuclear receptor coactivator 2 [Source:VGNC Symbol;Acc:VGNC:33099]
2	129652475	129675550	FUCA1	ENSBTAG00000030434	alpha-L-fucosidase 1 [Source:VGNC Symbol;Acc:VGNC:29140]
2	129687547	129705679	HMGCL	ENSBTAG00000021832	3-hydroxymethyl-3-methylglutaryl-CoA lyase [Source:VGNC Symbol;Acc:VGNC:29877]
2	129707282	129711866	GALE	ENSBTAG00000005002	UDP-galactose-4-epimerase [Source:VGNC Symbol;Acc:VGNC:29218]
2	129712519	129713577	LYPLA2	ENSBTAG00000011625	lysophospholipase II [Source:VGNC Symbol;Acc:VGNC:31106]
2	129716209	129723902	PITHD1	ENSBTAG00000021620	PITH domain containing 1 [Source:VGNC Symbol;Acc:VGNC:32918]
2	129726530	129728612	ENSBTAG00000047467	ENSBTAG00000047467
2	129738383	129752889	ELOA	ENSBTAG00000026585	transcription elongation factor B polypeptide 3 [Source:RefSeq peptide;Acc:NP_001095803]
2	129791372	129795563	RPL11	ENSBTAG00000020905	ribosomal protein L11 [Source:VGNC Symbol;Acc:VGNC:34108]
2	129927356	129942090	E2F2	ENSBTAG00000014400	E2F transcription factor 2 [Source:HGNC Symbol;Acc:HGNC:3114]
2	129969269	130018036	ASAP3	ENSBTAG00000012263	arf-GAP with SH3 domain, ANK repeat and PH domain-containing protein 3 [Source:RefSeq peptide;Acc:NP_001076915]
2	130023501	130069587	TCEA3	ENSBTAG00000038865	transcription elongation factor A3 [Source:VGNC Symbol;Acc:VGNC:35681]
2	130769172	130775911	C1QB	ENSBTAG00000011196	complement C1q B chain [Source:VGNC Symbol;Acc:VGNC:26617]
2	130783987	130788357	C1QC	ENSBTAG00000011193	complement C1q C chain [Source:VGNC Symbol;Acc:VGNC:26619]
2	130792855	130795743	C1QA	ENSBTAG00000007153	complement C1q A chain [Source:VGNC Symbol;Acc:VGNC:26616]
2	130830285	130858979	EPHA8	ENSBTAG00000020102	EPH receptor A8 [Source:VGNC Symbol;Acc:VGNC:28538]
2	130900401	130937992	ZBTB40	ENSBTAG00000016448	zinc finger and BTB domain containing 40 [Source:VGNC Symbol;Acc:VGNC:37079]
2	131304772	131315806	WNT4	ENSBTAG00000022671	Wnt family member 4 [Source:VGNC Symbol;Acc:VGNC:36959]
2	131341266	131359925	ENSBTAG00000001700	ENSBTAG00000001700
2	131410548	131414758	ENSBTAG00000040602	ENSBTAG00000040602	SCAN domain-containing protein 1-like [Source:RefSeq peptide;Acc:NP_001098840]
2	131425507	131432711	CELA3B	ENSBTAG00000013085
2	131462792	131466400	ENSBTAG00000030269	ENSBTAG00000030269	uncharacterized protein LOC789612 [Source:RefSeq peptide;Acc:NP_001098492]
2	131517579	131587498	HSPG2	ENSBTAG00000017122	heparan sulfate proteoglycan 2 [Source:VGNC Symbol;Acc:VGNC:29988]
2	131589017	131597324	LDLRAD2	ENSBTAG00000001784	low density lipoprotein receptor class A domain containing 2 [Source:VGNC Symbol;Acc:VGNC:30827]
2	131624285	131696605	USP48	ENSBTAG00000006940	ubiquitin specific peptidase 48 [Source:VGNC Symbol;Acc:VGNC:36733]
2	131706265	131776123	RAP1GAP	ENSBTAG00000008952	RAP1 GTPase activating protein [Source:VGNC Symbol;Acc:VGNC:33716]
2	131791680	131857642	ALPL	ENSBTAG00000008951	alkaline phosphatase, liver/bone/kidney [Source:VGNC Symbol;Acc:VGNC:25850]
2	131935441	132060210	ECE1	ENSBTAG00000002977	endothelin converting enzyme 1 [Source:VGNC Symbol;Acc:VGNC:28302]
2	132097562	132451412	EIF4G3	ENSBTAG00000040215	eukaryotic translation initiation factor 4 gamma 3 [Source:VGNC Symbol;Acc:VGNC:28417]
2	132470750	132507576	HP1BP3	ENSBTAG00000018656	heterochromatin protein 1 binding protein 3 [Source:VGNC Symbol;Acc:VGNC:29935]
2	132522953	132529468	SH2D5	ENSBTAG00000001082	SH2 domain containing 5 [Source:VGNC Symbol;Acc:VGNC:50133]
2	132533579	132584194	KIF17	ENSBTAG00000017644	kinesin family member 17 [Source:VGNC Symbol;Acc:VGNC:30586]
2	132587705	132600729	DDOST	ENSBTAG00000006085	dolichyl-diphosphooligosaccharide--protein glycosyltransferase non-catalytic subunit [Source:VGNC Symbol;Acc:VGNC:27952]
2	132601302	132621738	PINK1	ENSBTAG00000006084	PTEN induced putative kinase 1 [Source:VGNC Symbol;Acc:VGNC:32904]
2	132636462	132657392	CDA	ENSBTAG00000006136	cytidine deaminase [Source:VGNC Symbol;Acc:VGNC:27055]
2	89699629	89699997	ENSBTAG00000047849	ENSBTAG00000047849
2	122343234	122344583	ENSBTAG00000040518	ENSBTAG00000040518
2	130781188	130782246	ENSBTAG00000011195	ENSBTAG00000011195
2	24026141	24026247	ENSBTAG00000043489	ENSBTAG00000043489
2	125390299	125390431	ENSBTAG00000042723	ENSBTAG00000042723	RNA, U11 small nuclear [Source:HGNC Symbol;Acc:HGNC:10108]
2	125437888	125437961	ENSBTAG00000042553	ENSBTAG00000042553	small nucleolar RNA, C/D box 99 [Source:HGNC Symbol;Acc:HGNC:32762]
2	125436795	125436925	ENSBTAG00000042871	ENSBTAG00000042871	small nucleolar RNA, H/ACA box 44 [Source:HGNC Symbol;Acc:HGNC:32637]
2	130903852	130903927	bta-mir-2284u	ENSBTAG00000045330	bta-mir-2284u [Source:miRBase;Acc:MI0011387]
2	131659723	131659819	ENSBTAG00000044807	ENSBTAG00000044807
2	125436173	125436307	ENSBTAG00000042986	ENSBTAG00000042986
2	129469310	129469419	ENSBTAG00000042918	ENSBTAG00000042918
2	128245274	128245380	ENSBTAG00000042129	ENSBTAG00000042129
2	24001747	24001848	ENSBTAG00000040105	ENSBTAG00000040105
2	18651776	18651847	ENSBTAG00000044684	ENSBTAG00000044684
2	129669302	129669408	ENSBTAG00000043449	ENSBTAG00000043449
2	131334482	131334588	ENSBTAG00000042891	ENSBTAG00000042891
2	125499760	125499963	ENSBTAG00000046050	ENSBTAG00000046050
2	125437145	125437270	ENSBTAG00000043315	ENSBTAG00000043315
2	131814028	131814135	ENSBTAG00000042825	ENSBTAG00000042825
2	129988123	129988229	ENSBTAG00000043152	ENSBTAG00000043152
3	9022904	9053379	CD48	ENSBTAG00000011238	CD48 molecule [Source:VGNC Symbol;Acc:VGNC:27036]
3	9090441	9129487	SLAMF1	ENSBTAG00000007927	signaling lymphocytic activation molecule family member 1 [Source:VGNC Symbol;Acc:VGNC:34653]
3	9371595	9372444	ENSBTAG00000015741	ENSBTAG00000015741
3	9385092	9409694	VANGL2	ENSBTAG00000006560	VANGL planar cell polarity protein 2 [Source:VGNC Symbol;Acc:VGNC:36762]
3	9591852	9601502	CASQ1	ENSBTAG00000020223	calsequestrin 1 [Source:VGNC Symbol;Acc:VGNC:26786]
3	9605197	9637360	ATP1A4	ENSBTAG00000038523	ATPase Na+/K+ transporting subunit alpha 4 [Source:VGNC Symbol;Acc:VGNC:26284]
3	9645440	9670496	ATP1A2	ENSBTAG00000010551	Sodium/potassium-transporting ATPase subunit alpha-2 [Source:UniProtKB/Swiss-Prot;Acc:A2VDL6]
3	9695129	9702141	IGSF8	ENSBTAG00000009982	immunoglobulin superfamily member 8 [Source:VGNC Symbol;Acc:VGNC:30096]
3	9705464	9709562	KCNJ9	ENSBTAG00000024507	potassium voltage-gated channel subfamily J member 9 [Source:VGNC Symbol;Acc:VGNC:30464]
3	9720672	9755813	KCNJ10	ENSBTAG00000002414	potassium voltage-gated channel subfamily J member 10 [Source:VGNC Symbol;Acc:VGNC:30454]
3	57337986	57338852	ENSBTAG00000012502	ENSBTAG00000012502
3	57411164	57457439	SH3GLB1	ENSBTAG00000031171	SH3 domain containing GRB2 like, endophilin B1 [Source:VGNC Symbol;Acc:VGNC:34575]
3	57390507	57391002	ENSBTAG00000047364	ENSBTAG00000047364
3	9442357	9442758	NHLH1	ENSBTAG00000020027	nescient helix-loop-helix 1 [Source:VGNC Symbol;Acc:VGNC:32065]
3	9625568	9625664	ENSBTAG00000044911	ENSBTAG00000044911
3	9089634	9089726	ENSBTAG00000043605	ENSBTAG00000043605
4	20621606	20622383	ENSBTAG00000034376	ENSBTAG00000034376
4	46858942	46912545	PUS7	ENSBTAG00000007743	pseudouridylate synthase 7 homolog [Source:RefSeq peptide;Acc:NP_001070407]
4	46919802	46943664	RINT1	ENSBTAG00000008302	RAD50 interactor 1 [Source:VGNC Symbol;Acc:VGNC:33979]
4	46974646	47228658	ATXN7L1	ENSBTAG00000002037	ataxin 7 like 1 [Source:VGNC Symbol;Acc:VGNC:26343]
4	65670543	65729276	ADCYAP1R1	ENSBTAG00000020247	ADCYAP receptor type I [Source:VGNC Symbol;Acc:VGNC:25652]
4	65793129	65809031	GHRHR	ENSBTAG00000047599	growth hormone releasing hormone receptor [Source:VGNC Symbol;Acc:VGNC:29350]
4	113629209	113630153	ENSBTAG00000007983	ENSBTAG00000007983
4	113675460	113697512	GIMAP8	ENSBTAG00000014402	GTPase, IMAP family member 8 [Source:VGNC Symbol;Acc:VGNC:29357]
4	113720919	113729756	GIMAP7	ENSBTAG00000009850
4	26540377	26541499	PRPS1L1	ENSBTAG00000033954	ribose-phosphate pyrophosphokinase 3 [Source:RefSeq peptide;Acc:NP_001095953]
4	113602367	113604046	REPIN1	ENSBTAG00000038241	replication initiator 1 [Source:VGNC Symbol;Acc:VGNC:33868]
4	86942133	86942473	ENSBTAG00000044925	ENSBTAG00000044925	RNA, 7SK small nuclear pseudogene 277 [Source:HGNC Symbol;Acc:HGNC:46001]
5	86571273	87036285	SOX5	ENSBTAG00000022360	SRY-box 5 [Source:VGNC Symbol;Acc:VGNC:35149]
5	97239157	97258621	GSG1	ENSBTAG00000004721	germ cell associated 1 [Source:VGNC Symbol;Acc:VGNC:29676]
5	97259948	97288270	FAM234B	ENSBTAG00000014322	family with sequence similarity 234 member B [Source:VGNC Symbol;Acc:VGNC:28805]
5	97348105	97385488	HEBP1	ENSBTAG00000005868	Heme-binding protein 1 [Source:UniProtKB/Swiss-Prot;Acc:Q148C9]
5	97402843	97410006	GPRC5D	ENSBTAG00000014288	G protein-coupled receptor class C group 5 member D [Source:VGNC Symbol;Acc:VGNC:29608]
5	97433255	97453094	GPRC5A	ENSBTAG00000039509	G protein-coupled receptor class C group 5 member A [Source:VGNC Symbol;Acc:VGNC:29606]
5	97490416	97503460	DDX47	ENSBTAG00000019608	DEAD-box helicase 47 [Source:VGNC Symbol;Acc:VGNC:27970]
5	99823289	99830338	ENSBTAG00000045786	ENSBTAG00000045786	Bos taurus NKG2-A/NKG2-B type II integral membrane protein-like (LOC100847738), mRNA. [Source:RefSeq mRNA;Acc:NM_001319888]
5	99860609	99870803	KLRJ1	ENSBTAG00000022861	killer cell lectin-like receptor family J member 1 [Source:RefSeq peptide;Acc:NP_001002884]
5	99974365	99978911	NKG2A	ENSBTAG00000007720
5	99988121	99992305	NKG2C	ENSBTAG00000038843	NKG2C protein [Source:RefSeq peptide;Acc:NP_001091632]
5	100038296	100048947	KLRK1	ENSBTAG00000004917	NKG2-D type II integral membrane protein [Source:RefSeq peptide;Acc:NP_001068607]
5	100095828	100101039	KLRD1	ENSBTAG00000046389	natural killer cells antigen CD94 [Source:RefSeq peptide;Acc:NP_001002890]
5	100112515	100118909	ENSBTAG00000000966	ENSBTAG00000000966
5	109436267	109454513	ADA2	ENSBTAG00000017313	adenosine deaminase 2 [Source:HGNC Symbol;Acc:HGNC:1839]
5	109515049	109553453	CECR2	ENSBTAG00000009704	CECR2, histone acetyl-lysine reader [Source:VGNC Symbol;Acc:VGNC:49053]
5	109564503	109578159	ATP6V1E1	ENSBTAG00000014238	ATPase H+ transporting V1 subunit E1 [Source:VGNC Symbol;Acc:VGNC:26322]
5	109584777	109635907	BCL2L13	ENSBTAG00000013956	bcl-2-like protein 13 [Source:RefSeq peptide;Acc:NP_001071550]
5	118086468	118343833	TBC1D22A	ENSBTAG00000012291	TBC1 domain family member 22A [Source:VGNC Symbol;Acc:VGNC:35636]
5	97520910	97524789	APOLD1	ENSBTAG00000002362	apolipoprotein L domain containing 1 [Source:VGNC Symbol;Acc:VGNC:26033]
5	97529338	97529411	ENSBTAG00000048294	ENSBTAG00000048294
5	109463613	109463719	ENSBTAG00000042255	ENSBTAG00000042255
6	12965030	13272298	CAMK2D	ENSBTAG00000014463	Calcium/calmodulin-dependent protein kinase type II subunit delta [Source:UniProtKB/Swiss-Prot;Acc:Q2HJF7]
6	46471813	46504926	ANAPC4	ENSBTAG00000000646	anaphase promoting complex subunit 4 [Source:VGNC Symbol;Acc:VGNC:25884]
6	81299794	81300203	ENSBTAG00000024445	ENSBTAG00000024445
6	99846841	99892778	HPSE	ENSBTAG00000005745	heparanase [Source:VGNC Symbol;Acc:VGNC:29948]
6	99999687	100006472	ENSBTAG00000018151	ENSBTAG00000018151
6	99976544	99976614	bta-mir-2446	ENSBTAG00000045132	bta-mir-2446 [Source:miRBase;Acc:MI0011500]
6	46501972	46502082	ENSBTAG00000028675	ENSBTAG00000028675
6	81308205	81308310	ENSBTAG00000043627	ENSBTAG00000043627
7	6703832	6705051	ENSBTAG00000047589	ENSBTAG00000047589
7	11217024	11218082	ENSBTAG00000046397	ENSBTAG00000046397
7	11301949	11302988	ENSBTAG00000045927	ENSBTAG00000045927
7	11324606	11325992	ENSBTAG00000047576	ENSBTAG00000047576
7	11339252	11340452	ENSBTAG00000047433	ENSBTAG00000047433
7	96124692	96354407	KIAA0825	ENSBTAG00000003144	KIAA0825 [Source:VGNC Symbol;Acc:VGNC:30556]
7	96366971	96422024	SLF1	ENSBTAG00000006107	SMC5-SMC6 complex localization factor protein 1 [Source:RefSeq peptide;Acc:NP_001095528]
7	11262124	11263101	ENSBTAG00000046798	ENSBTAG00000046798
7	87601105	87601319	ENSBTAG00000036618	ENSBTAG00000036618
8	349043	544502	ANXA10	ENSBTAG00000004944	annexin A10 [Source:VGNC Symbol;Acc:VGNC:25963]
8	8635550	9019576	MSRA	ENSBTAG00000021632	methionine sulfoxide reductase A [Source:VGNC Symbol;Acc:VGNC:31705]
8	26938856	27189256	CNTLN	ENSBTAG00000001847	centlein [Source:HGNC Symbol;Acc:HGNC:23432]
8	67724946	67781207	SLC18A1	ENSBTAG00000020788	solute carrier family 18 member A1 [Source:VGNC Symbol;Acc:VGNC:34705]
8	67798291	67824441	ATP6V1B2	ENSBTAG00000018646	ATPase H+ transporting V1 subunit B2 [Source:VGNC Symbol;Acc:VGNC:26318]
8	88647288	88648324	ENSBTAG00000046969	ENSBTAG00000046969
8	88673821	88708956	DIRAS2	ENSBTAG00000014523	DIRAS family GTPase 2 [Source:VGNC Symbol;Acc:VGNC:28070]
8	98331864	98426787	ZNF462	ENSBTAG00000019187	zinc finger protein 462 [Source:VGNC Symbol;Acc:VGNC:37280]
8	64998047	65000257	ENSBTAG00000019143	ENSBTAG00000019143	uncharacterized protein LOC539818 precursor [Source:RefSeq peptide;Acc:NP_001095991]
9	75364392	75519232	MAP7	ENSBTAG00000001598	microtubule associated protein 7 [Source:VGNC Symbol;Acc:VGNC:31210]
9	75549283	75778418	MAP3K5	ENSBTAG00000009065	mitogen-activated protein kinase kinase kinase 5 [Source:VGNC Symbol;Acc:VGNC:31198]
9	98421510	99568077	PRKN	ENSBTAG00000018996	parkin RBR E3 ubiquitin protein ligase [Source:VGNC Symbol;Acc:VGNC:33342]
9	99649026	100180707	PACRG	ENSBTAG00000011106	parkin coregulated [Source:HGNC Symbol;Acc:HGNC:19152]
9	17767955	17768268	ENSBTAG00000043808	ENSBTAG00000043808
10	8737160	8822375	TBCA	ENSBTAG00000003263	tubulin folding cofactor A [Source:VGNC Symbol;Acc:VGNC:35648]
10	30138490	30159344	ENSBTAG00000020100	ENSBTAG00000020100
10	32328992	32570684	C10H15orf41	ENSBTAG00000002179	Uncharacterized protein C15orf41 homolog [Source:UniProtKB/Swiss-Prot;Acc:Q5E9S8]
10	33665331	33679717	TMCO5A	ENSBTAG00000027162	transmembrane and coiled-coil domains 5A [Source:VGNC Symbol;Acc:VGNC:35932]
10	35314025	35329297	THBS1	ENSBTAG00000002006	thrombospondin 1 [Source:VGNC Symbol;Acc:VGNC:35828]
10	35350329	35538497	FSIP1	ENSBTAG00000012015	fibrous sheath interacting protein 1 [Source:VGNC Symbol;Acc:VGNC:29133]
10	35984430	36013346	PAK6	ENSBTAG00000019076
10	36024408	36044688	PLCB2	ENSBTAG00000019079	phospholipase C beta 2 [Source:VGNC Symbol;Acc:VGNC:32981]
10	36068634	36074651	CCDC9B	ENSBTAG00000013774	coiled-coil domain containing 9B [Source:HGNC Symbol;Acc:HGNC:33488]
10	36092995	36103677	DISP2	ENSBTAG00000000552	dispatched RND transporter family member 2 [Source:VGNC Symbol;Acc:VGNC:28075]
10	36117898	36127741	KNSTRN	ENSBTAG00000032340	kinetochore localized astrin/SPAG5 binding protein [Source:VGNC Symbol;Acc:VGNC:30698]
10	36140626	36152399	IVD	ENSBTAG00000004409	isovaleryl-CoA dehydrogenase [Source:VGNC Symbol;Acc:VGNC:50203]
10	36368263	36403938	RAD51	ENSBTAG00000002918	RAD51 recombinase [Source:VGNC Symbol;Acc:VGNC:33684]
10	36404114	36419370	RMDN3	ENSBTAG00000002921	regulator of microtubule dynamics 3 [Source:VGNC Symbol;Acc:VGNC:33993]
10	36425458	36429223	GCHFR	ENSBTAG00000013477	GTP cyclohydrolase I feedback regulator [Source:VGNC Symbol;Acc:VGNC:29287]
10	36429386	36460034	DNAJC17	ENSBTAG00000013480	DnaJ homolog subfamily C member 17 [Source:UniProtKB/Swiss-Prot;Acc:Q2KI83]
10	36460184	36467297	ZFYVE19	ENSBTAG00000013485	zinc finger FYVE-type containing 19 [Source:VGNC Symbol;Acc:VGNC:37175]
10	36468114	36478924	PPP1R14D	ENSBTAG00000013488
10	36490427	36504314	SPINT1	ENSBTAG00000004086	serine peptidase inhibitor, Kunitz type 1 [Source:VGNC Symbol;Acc:VGNC:35221]
10	36523869	36525354	RHOV	ENSBTAG00000016291	rho-related GTP-binding protein RhoV [Source:RefSeq peptide;Acc:NP_001069567]
10	36546258	36554962	VPS18	ENSBTAG00000011567	VPS18, CORVET/HOPS core subunit [Source:VGNC Symbol;Acc:VGNC:36812]
10	36619650	36715000	INO80	ENSBTAG00000010380	INO80 complex subunit [Source:VGNC Symbol;Acc:VGNC:30205]
10	36757276	36758438	ENSBTAG00000038438	ENSBTAG00000038438
10	36793944	36832672	EXD1	ENSBTAG00000008363	exonuclease 3'-5' domain containing 1 [Source:VGNC Symbol;Acc:VGNC:28639]
10	36835140	36872289	CHP1	ENSBTAG00000027173	calcineurin like EF-hand protein 1 [Source:VGNC Symbol;Acc:VGNC:27310]
10	36980593	37025485	RTF1	ENSBTAG00000001671	RTF1 homolog, Paf1/RNA polymerase II complex component [Source:VGNC Symbol;Acc:VGNC:34195]
10	37035180	37043518	ITPKA	ENSBTAG00000001675	inositol-trisphosphate 3-kinase A [Source:VGNC Symbol;Acc:VGNC:30344]
10	37055212	37071120	RPAP1	ENSBTAG00000001693	RNA polymerase II associated protein 1 [Source:VGNC Symbol;Acc:VGNC:34098]
10	37078592	37095809	TYRO3	ENSBTAG00000001694	TYRO3 protein tyrosine kinase [Source:VGNC Symbol;Acc:VGNC:36551]
10	37288355	37336641	MAPKBP1	ENSBTAG00000015142	mitogen-activated protein kinase binding protein 1 [Source:VGNC Symbol;Acc:VGNC:31231]
10	37338864	37345321	JMJD7	ENSBTAG00000046607	jumonji domain containing 7 [Source:HGNC Symbol;Acc:HGNC:34397]
10	37346275	37355599	PLA2G4B	ENSBTAG00000006784
10	37355715	37405210	SPTBN5	ENSBTAG00000006790	spectrin beta, non-erythrocytic 5 [Source:VGNC Symbol;Acc:VGNC:35255]
10	37412316	37496211	EHD4	ENSBTAG00000006792	EH domain containing 4 [Source:VGNC Symbol;Acc:VGNC:28374]
10	37506677	37549023	PLA2G4E	ENSBTAG00000021924	phospholipase A2 group IVE [Source:HGNC Symbol;Acc:HGNC:24791]
10	37602795	37624778	PLA2G4D	ENSBTAG00000005268	phospholipase A2 group IVD [Source:VGNC Symbol;Acc:VGNC:32961]
10	37650256	37664678	PLA2G4F	ENSBTAG00000032068	phospholipase A2 group IVF [Source:VGNC Symbol;Acc:VGNC:32962]
10	37668738	37713608	VPS39	ENSBTAG00000032055	VPS39, HOPS complex subunit [Source:VGNC Symbol;Acc:VGNC:36822]
10	37715493	37754263	TMEM87A	ENSBTAG00000008863	transmembrane protein 87A [Source:VGNC Symbol;Acc:VGNC:36118]
10	37754445	37817713	GANC	ENSBTAG00000008866	glucosidase alpha, neutral C [Source:VGNC Symbol;Acc:VGNC:29246]
10	37890185	37941980	ZNF106	ENSBTAG00000004079	zinc finger protein 106 [Source:VGNC Symbol;Acc:VGNC:37207]
10	37946231	37986849	SNAP23	ENSBTAG00000005661	synaptosome associated protein 23 [Source:VGNC Symbol;Acc:VGNC:35050]
10	37989936	37995280	LRRC57	ENSBTAG00000031981	leucine-rich repeat-containing protein 57 [Source:RefSeq peptide;Acc:NP_001026924]
10	37995372	38008615	HAUS2	ENSBTAG00000005663	HAUS augmin like complex subunit 2 [Source:VGNC Symbol;Acc:VGNC:29758]
10	38301493	38447561	UBR1	ENSBTAG00000021087	ubiquitin protein ligase E3 component n-recognin 1 [Source:VGNC Symbol;Acc:VGNC:36616]
10	38473475	38507255	TMEM62	ENSBTAG00000013031	transmembrane protein 62 [Source:VGNC Symbol;Acc:VGNC:36102]
10	38507733	38518176	CCNDBP1	ENSBTAG00000013032	cyclin D1 binding protein 1 [Source:VGNC Symbol;Acc:VGNC:26965]
10	38519703	38538816	EPB42	ENSBTAG00000011439	erythrocyte membrane protein band 4.2 [Source:VGNC Symbol;Acc:VGNC:28526]
10	39914871	40445335	MDGA2	ENSBTAG00000005697	MAM domain containing glycosylphosphatidylinositol anchor 2 [Source:VGNC Symbol;Acc:VGNC:31332]
10	40160277	40161181	ENSBTAG00000032894	ENSBTAG00000032894
10	49860062	49904536	ANXA2	ENSBTAG00000009615	Annexin A2 [Source:UniProtKB/Swiss-Prot;Acc:P04272]
10	50870432	50931413	FAM81A	ENSBTAG00000014699	family with sequence similarity 81 member A [Source:VGNC Symbol;Acc:VGNC:28830]
10	51020033	51240077	MYO1E	ENSBTAG00000021538	myosin IE [Source:VGNC Symbol;Acc:VGNC:31820]
10	51247755	51272733	CCNB2	ENSBTAG00000005269	cyclin B2 [Source:VGNC Symbol;Acc:VGNC:26960]
10	51288677	51380159	RNF111	ENSBTAG00000014181	ring finger protein 111 [Source:VGNC Symbol;Acc:VGNC:34010]
10	52648527	52655730	POLR2M	ENSBTAG00000040384	DNA-directed RNA polymerase II subunit GRINL1A [Source:UniProtKB/Swiss-Prot;Acc:Q17QE3]
10	54281616	54422091	RFX7	ENSBTAG00000000565	regulatory factor X7 [Source:VGNC Symbol;Acc:VGNC:33899]
10	54498979	54500227	ENSBTAG00000031396	ENSBTAG00000031396
10	55717362	56389601	UNC13C	ENSBTAG00000025522	unc-13 homolog C [Source:VGNC Symbol;Acc:VGNC:36665]
10	56678901	56805084	WDR72	ENSBTAG00000021876	WD repeat domain 72 [Source:VGNC Symbol;Acc:VGNC:36916]
10	58026028	58152577	MYO5A	ENSBTAG00000006489	myosin VA [Source:VGNC Symbol;Acc:VGNC:31826]
10	58176957	58278067	MYO5C	ENSBTAG00000003763	myosin VC [Source:VGNC Symbol;Acc:VGNC:31828]
10	59077123	59131740	GLDN	ENSBTAG00000002576	gliomedin [Source:VGNC Symbol;Acc:VGNC:29396]
10	59227895	59282939	CYP19A1	ENSBTAG00000014890	aromatase [Source:RefSeq peptide;Acc:NP_776730]
10	63804151	63804644	ENSBTAG00000019879	ENSBTAG00000019879
10	65907458	65971345	DDHD1	ENSBTAG00000019924	DDHD domain containing 1 [Source:VGNC Symbol;Acc:VGNC:27943]
10	71986326	71987819	GPR135	ENSBTAG00000003370	G protein-coupled receptor 135 [Source:VGNC Symbol;Acc:VGNC:29549]
10	71992845	72005431	L3HYPDH	ENSBTAG00000030824	trans-L-3-hydroxyproline dehydratase [Source:VGNC Symbol;Acc:VGNC:30762]
10	72005597	72027740	JKAMP	ENSBTAG00000003371	JNK1/MAPK8 associated membrane protein [Source:VGNC Symbol;Acc:VGNC:30375]
10	72027465	72101711	CCDC175	ENSBTAG00000011448	coiled-coil domain containing 175 [Source:VGNC Symbol;Acc:VGNC:26872]
10	72413702	72514374	LRRC9	ENSBTAG00000003090	leucine rich repeat containing 9 [Source:HGNC Symbol;Acc:HGNC:19848]
10	72577420	72602467	PCNX4	ENSBTAG00000014096	pecanex homolog 4 [Source:VGNC Symbol;Acc:VGNC:32641]
10	102020147	102300271	FOXN3	ENSBTAG00000046684	forkhead box protein N3 [Source:RefSeq peptide;Acc:NP_001193616]
10	36017219	36018364	ANKRD63	ENSBTAG00000046052	ankyrin repeat domain 63 [Source:VGNC Symbol;Acc:VGNC:25940]
10	36431890	36432438	C15orf62	ENSBTAG00000047281	chromosome 15 open reading frame 62 [Source:HGNC Symbol;Acc:HGNC:34489]
10	56820937	56821305	ENSBTAG00000046311	ENSBTAG00000046311
10	42231365	42231440	ENSBTAG00000045199	ENSBTAG00000045199
10	58120394	58120570	ENSBTAG00000044748	ENSBTAG00000044748
10	33675854	33675952	ENSBTAG00000045158	ENSBTAG00000045158
10	34736653	34736722	ENSBTAG00000045437	ENSBTAG00000045437
10	37139531	37139637	ENSBTAG00000042188	ENSBTAG00000042188
11	15493304	15947670	LTBP1	ENSBTAG00000019839	latent transforming growth factor beta binding protein 1 [Source:VGNC Symbol;Acc:VGNC:31071]
11	78168945	78254093	LDAH	ENSBTAG00000031014	lipid droplet associated hydrolase [Source:VGNC Symbol;Acc:VGNC:30821]
11	80842561	80844195	KCNS3	ENSBTAG00000019212	potassium voltage-gated channel modifier subfamily S member 3 [Source:VGNC Symbol;Acc:VGNC:30493]
12	5086499	5200843	PCDH17	ENSBTAG00000010420	protocadherin 17 [Source:VGNC Symbol;Acc:VGNC:32618]
12	54444670	54444774	ENSBTAG00000043303	ENSBTAG00000043303
13	20930714	20975352	ENSBTAG00000037969	ENSBTAG00000037969
13	21049546	21386152	ENSBTAG00000023216	ENSBTAG00000023216
14	26448145	26500189	NSMAF	ENSBTAG00000008958	neutral sphingomyelinase activation associated factor [Source:VGNC Symbol;Acc:VGNC:32278]
14	27864735	27937015	RAB2A	ENSBTAG00000000948	RAB2A, member RAS oncogene family [Source:VGNC Symbol;Acc:VGNC:33637]
14	34040796	34340573	PREX2	ENSBTAG00000022169	phosphatidylinositol-3,4,5-trisphosphate dependent Rac exchange factor 2 [Source:VGNC Symbol;Acc:VGNC:33312]
14	35476252	35558292	SULF1	ENSBTAG00000004720	sulfatase 1 [Source:HGNC Symbol;Acc:HGNC:20391]
14	35583263	35727312	SLCO5A1	ENSBTAG00000032881	solute carrier organic anion transporter family member 5A1 [Source:VGNC Symbol;Acc:VGNC:34956]
14	37989629	37990502	ENSBTAG00000048040	ENSBTAG00000048040
14	38021172	38454345	KCNB2	ENSBTAG00000040496	potassium voltage-gated channel subfamily B member 2 [Source:VGNC Symbol;Acc:VGNC:30431]
14	40830954	40965775	HNF4G	ENSBTAG00000008280	hepatocyte nuclear factor 4 gamma [Source:VGNC Symbol;Acc:VGNC:29892]
14	44969002	45027081	STMN2	ENSBTAG00000020099	stathmin 2 [Source:VGNC Symbol;Acc:VGNC:35404]
14	64905620	65031370	GRHL2	ENSBTAG00000004518	grainyhead like transcription factor 2 [Source:VGNC Symbol;Acc:VGNC:29635]
14	80076505	80281851	RALYL	ENSBTAG00000017717	RNA-binding Raly-like protein [Source:RefSeq peptide;Acc:NP_001071400]
14	83139846	83177274	SNX16	ENSBTAG00000019639	sorting nexin 16 [Source:VGNC Symbol;Acc:VGNC:35096]
14	35568651	35569172	ENSBTAG00000037399	ENSBTAG00000037399
14	45039060	45039371	ENSBTAG00000032812	ENSBTAG00000032812
14	41513836	41513938	ENSBTAG00000042995	ENSBTAG00000042995
14	65091809	65091920	ENSBTAG00000043313	ENSBTAG00000043313
14	64910449	64910552	ENSBTAG00000044766	ENSBTAG00000044766
14	65081265	65081409	ENSBTAG00000045224	ENSBTAG00000045224
14	35694823	35694922	ENSBTAG00000044870	ENSBTAG00000044870
15	78044073	78254804	C15H11orf49	ENSBTAG00000009573	UPF0705 protein C11orf49 homolog [Source:RefSeq peptide;Acc:NP_001033126]
15	78254747	78265239	ARFGAP2	ENSBTAG00000009574	ADP ribosylation factor GTPase activating protein 2 [Source:VGNC Symbol;Acc:VGNC:26062]
15	78266386	78275225	PACSIN3	ENSBTAG00000009576	protein kinase C and casein kinase substrate in neurons 3 [Source:VGNC Symbol;Acc:VGNC:32544]
15	78289541	78309815	DDB2	ENSBTAG00000020999	damage specific DNA binding protein 2 [Source:VGNC Symbol;Acc:VGNC:27942]
15	46603202	46604152	ENSBTAG00000037603	ENSBTAG00000037603
15	46624353	46625288	ENSBTAG00000038031	ENSBTAG00000038031
15	46640680	46641606	ENSBTAG00000036031	ENSBTAG00000036031
15	46682344	46683276	ENSBTAG00000035675	ENSBTAG00000035675
15	46692952	46693881	ENSBTAG00000015791	ENSBTAG00000015791
15	78167892	78167962	ENSBTAG00000044593	ENSBTAG00000044593
15	46677930	46678035	ENSBTAG00000042988	ENSBTAG00000042988
16	19500371	19567831	KCTD3	ENSBTAG00000006186	BTB/POZ domain-containing protein KCTD3 [Source:RefSeq peptide;Acc:NP_001178353]
16	19573856	20502175	USH2A	ENSBTAG00000006188	usherin [Source:VGNC Symbol;Acc:VGNC:36706]
16	35727294	35733187	MAP1LC3C	ENSBTAG00000012462	microtubule associated protein 1 light chain 3 gamma [Source:VGNC Symbol;Acc:VGNC:31180]
16	35747266	35788726	EXO1	ENSBTAG00000009396	exonuclease 1 [Source:VGNC Symbol;Acc:VGNC:28642]
16	65545497	65662819	LAMC1	ENSBTAG00000011966	laminin subunit gamma 1 [Source:VGNC Symbol;Acc:VGNC:50206]
16	75069690	75212644	SYT14	ENSBTAG00000046723	synaptotagmin 14 [Source:HGNC Symbol;Acc:HGNC:23143]
16	75346250	75373188	DIEXF	ENSBTAG00000020886	digestive organ expansion factor homolog (zebrafish) [Source:HGNC Symbol;Acc:HGNC:28440]
16	75401221	75417466	IRF6	ENSBTAG00000002849	interferon regulatory factor 6 [Source:VGNC Symbol;Acc:VGNC:30277]
16	75421211	75423467	C16H1orf74	ENSBTAG00000002848	UPF0739 protein C1orf74 homolog [Source:UniProtKB/Swiss-Prot;Acc:A6QQA5]
16	75423473	75446749	TRAF3IP3	ENSBTAG00000002846	TRAF3 interacting protein 3 [Source:VGNC Symbol;Acc:VGNC:36275]
16	35698745	35700058	BECN2	ENSBTAG00000013700	beclin 2 [Source:VGNC Symbol;Acc:VGNC:26464]
16	14276654	14276772	ENSBTAG00000036945	ENSBTAG00000036945
16	75799966	75800034	bta-mir-205	ENSBTAG00000029854	bta-mir-205 [Source:miRBase;Acc:MI0004759]
18	11655286	11682581	GSE1	ENSBTAG00000009918	Gse1 coiled-coil protein [Source:HGNC Symbol;Acc:HGNC:28979]
18	11687200	11724596	GINS2	ENSBTAG00000044006	GINS complex subunit 2 [Source:VGNC Symbol;Acc:VGNC:29361]
18	54302393	54313935	SLC1A5	ENSBTAG00000013577	solute carrier family 1 member 5 [Source:VGNC Symbol;Acc:VGNC:34715]
18	54363679	54373314	AP2S1	ENSBTAG00000010584	adaptor related protein complex 2 sigma 1 subunit [Source:VGNC Symbol;Acc:VGNC:25986]
18	54425390	54497692	ARHGAP35	ENSBTAG00000015543	Rho GTPase activating protein 35 [Source:VGNC Symbol;Acc:VGNC:26092]
19	5696798	5747138	HLF	ENSBTAG00000006618	HLF, PAR bZIP transcription factor [Source:VGNC Symbol;Acc:VGNC:50275]
19	5819716	5840124	MMD	ENSBTAG00000000205	monocyte to macrophage differentiation associated [Source:VGNC Symbol;Acc:VGNC:31512]
19	53100965	53113264	GAA	ENSBTAG00000016021	glucosidase alpha, acid [Source:VGNC Symbol;Acc:VGNC:29182]
19	53117575	53158255	CCDC40	ENSBTAG00000016017	coiled-coil domain containing 40 [Source:VGNC Symbol;Acc:VGNC:26895]
19	53181379	53245548	TBC1D16	ENSBTAG00000003192	TBC1 domain family member 16 [Source:VGNC Symbol;Acc:VGNC:35630]
19	53108151	53108444	ENSBTAG00000030186	ENSBTAG00000030186	Up-regulated during skeletal muscle growth protein 5 [Source:UniProtKB/Swiss-Prot;Acc:Q3ZBI7]
20	18200880	18371920	NDUFAF2	ENSBTAG00000021607	NADH:ubiquinone oxidoreductase complex assembly factor 2 [Source:VGNC Symbol;Acc:VGNC:31954]
20	20448540	20741101	RAB3C	ENSBTAG00000007306	Bos taurus RAB3C, member RAS oncogene family (RAB3C), mRNA. [Source:RefSeq mRNA;Acc:NM_001046606]
20	20575856	20576238	ENSBTAG00000005229	ENSBTAG00000005229
20	23212633	23270316	IL6ST	ENSBTAG00000017745	interleukin 6 signal transducer [Source:VGNC Symbol;Acc:VGNC:30168]
20	23305806	23355111	IL31RA	ENSBTAG00000004351	interleukin 31 receptor A [Source:VGNC Symbol;Acc:VGNC:30154]
20	23379443	23444459	DDX4	ENSBTAG00000008871	DEAD-box helicase 4 [Source:VGNC Symbol;Acc:VGNC:27966]
20	23727322	23853276	MTREX	ENSBTAG00000010518	Mtr4 exosome RNA helicase [Source:VGNC Symbol;Acc:VGNC:34649]
20	23853539	23900484	DHX29	ENSBTAG00000010510	DExH-box helicase 29 [Source:VGNC Symbol;Acc:VGNC:28050]
20	23924721	23926909	CCNO	ENSBTAG00000047594	cyclin O [Source:VGNC Symbol;Acc:VGNC:26977]
20	23931160	23937410	MCIDAS	ENSBTAG00000047087	multiciliate differentiation and DNA synthesis associated cell cycle protein [Source:VGNC Symbol;Acc:VGNC:31306]
20	23975640	23980445	GPX8	ENSBTAG00000021960	Probable glutathione peroxidase 8 [Source:UniProtKB/Swiss-Prot;Acc:Q2NL01]
20	23993844	24022535	CDC20B	ENSBTAG00000021959	cell division cycle 20B [Source:VGNC Symbol;Acc:VGNC:27061]
20	31696673	31697454	ENSBTAG00000033224	ENSBTAG00000033224
20	31793082	31834092	CCDC152	ENSBTAG00000033221	coiled-coil domain containing 152 [Source:VGNC Symbol;Acc:VGNC:26857]
20	31890736	32199996	GHR	ENSBTAG00000001335	growth hormone receptor [Source:VGNC Symbol;Acc:VGNC:50184]
20	21948512	21948937	ENSBTAG00000026505	ENSBTAG00000026505
20	24659525	24660204	HSPB3	ENSBTAG00000022714	Heat shock protein beta-3 [Source:UniProtKB/Swiss-Prot;Acc:Q2KHU9]
20	21814396	21815526	ENSBTAG00000046468	ENSBTAG00000046468
20	23962986	23963091	bta-mir-449c	ENSBTAG00000030051	bta-mir-449c [Source:miRBase;Acc:MI0009836]
20	21815200	21815283	ENSBTAG00000047114	ENSBTAG00000047114
20	20653612	20653737	ENSBTAG00000043799	ENSBTAG00000043799
20	21886626	21886712	ENSBTAG00000042330	ENSBTAG00000042330
20	21887968	21888085	ENSBTAG00000044319	ENSBTAG00000044319
20	18198000	18198163	ENSBTAG00000047951	ENSBTAG00000047951
20	23967269	23967366	bta-mir-449b	ENSBTAG00000030027	bta-mir-449b [Source:miRBase;Acc:MI0009835]
20	23967393	23967480	bta-mir-449a	ENSBTAG00000030121	bta-mir-449a [Source:miRBase;Acc:MI0009834]
22	47721360	48066942	CACNA1D	ENSBTAG00000010026	calcium voltage-gated channel subunit alpha1 D [Source:VGNC Symbol;Acc:VGNC:26674]
22	51994224	52003466	CCDC51	ENSBTAG00000013413	coiled-coil domain containing 51 [Source:VGNC Symbol;Acc:VGNC:26899]
22	52011053	52033986	PLXNB1	ENSBTAG00000013407	plexin B1 [Source:VGNC Symbol;Acc:VGNC:33061]
22	52109194	52118716	SPINK8	ENSBTAG00000031612	serine peptidase inhibitor, Kazal type 8 (putative) [Source:HGNC Symbol;Acc:HGNC:33160]
22	52126504	52133264	NME6	ENSBTAG00000003025	NME/NM23 nucleoside diphosphate kinase 6 [Source:VGNC Symbol;Acc:VGNC:32128]
22	52143306	52145266	CAMP	ENSBTAG00000003022	Cathelicidin-7 [Source:UniProtKB/Swiss-Prot;Acc:P56425]
22	52148151	52149577	CATHL1	ENSBTAG00000013356	Cathelicidin-1 [Source:UniProtKB/Swiss-Prot;Acc:P22226]
23	13160210	13172869	KCNK17	ENSBTAG00000010328	potassium two pore domain channel subfamily K member 17 [Source:VGNC Symbol;Acc:VGNC:30470]
23	13175069	13181327	KCNK16	ENSBTAG00000010352	potassium two pore domain channel subfamily K member 16 [Source:VGNC Symbol;Acc:VGNC:30469]
23	13389447	13520727	ENSBTAG00000027197	ENSBTAG00000027197
23	15803546	15823240	TAF8	ENSBTAG00000011339	TATA-box binding protein associated factor 8 [Source:VGNC Symbol;Acc:VGNC:35581]
23	15841664	15847756	ENSBTAG00000048230	ENSBTAG00000048230
23	15901126	15908139	GUCA1A	ENSBTAG00000012823	guanylate cyclase activator 1A [Source:VGNC Symbol;Acc:VGNC:29714]
23	15910249	15921069	GUCA1B	ENSBTAG00000012439	guanylate cyclase activator 1B [Source:VGNC Symbol;Acc:VGNC:29715]
23	15930029	15941569	MRPS10	ENSBTAG00000015301	mitochondrial ribosomal protein S10 [Source:VGNC Symbol;Acc:VGNC:31654]
23	15948727	15988075	TRERF1	ENSBTAG00000015321	transcriptional regulating factor 1 [Source:VGNC Symbol;Acc:VGNC:36302]
23	23795772	24250799	PKHD1	ENSBTAG00000011237	PKHD1, fibrocystin/polyductin [Source:VGNC Symbol;Acc:VGNC:32939]
23	24346988	24350509	IL17A	ENSBTAG00000002150	interleukin 17A [Source:VGNC Symbol;Acc:VGNC:30117]
23	24390407	24397956	IL17F	ENSBTAG00000016835	interleukin 17F [Source:VGNC Symbol;Acc:VGNC:30121]
23	24438946	24456316	MCM3	ENSBTAG00000010721	minichromosome maintenance complex component 3 [Source:VGNC Symbol;Acc:VGNC:31309]
23	24803730	24814237	TMEM14A	ENSBTAG00000005206	transmembrane protein 14A [Source:VGNC Symbol;Acc:VGNC:35979]
23	24823643	24837430	GSTA2	ENSBTAG00000006546	Glutathione S-transferase A2 [Source:UniProtKB/Swiss-Prot;Acc:O18879]
23	24851502	24872822	ENSBTAG00000025485	ENSBTAG00000025485
23	24875608	24890466	GSTA3	ENSBTAG00000021516	glutathione S-transferase A1 [Source:RefSeq peptide;Acc:NP_001071617]
23	24894759	24916117	GSTA5	ENSBTAG00000037949	glutathione S-transferase A5 [Source:RefSeq peptide;Acc:NP_001092486]
23	24935523	24957718	GSTA3	ENSBTAG00000032642	glutathione S-transferase A4 [Source:RefSeq peptide;Acc:NP_001070580]
23	24963227	24977317	GSTA4	ENSBTAG00000004288	Glutathione S-transferase A4 [Source:UniProtKB/Swiss-Prot;Acc:Q5E9G0]
23	24982766	25027197	ICK	ENSBTAG00000015590	intestinal cell kinase [Source:VGNC Symbol;Acc:VGNC:30028]
23	25030303	25051787	FBXO9	ENSBTAG00000015083	F-box protein 9 [Source:VGNC Symbol;Acc:VGNC:28921]
23	25066915	25087445	GCM1	ENSBTAG00000008148	glial cells missing homolog 1 [Source:VGNC Symbol;Acc:VGNC:29291]
23	25351283	25356959	BOLA-DQA2	ENSBTAG00000009656	Bos taurus major histocompatibility complex, class II, DQ alpha 2 (BOLA-DQA2), mRNA. [Source:RefSeq mRNA;Acc:NM_001012681]
23	25375270	25388620	BOLA-DQB	ENSBTAG00000021077
23	25404020	25411643	BOLA-DQA5	ENSBTAG00000038128
23	25423551	25424597	ENSBTAG00000003352	ENSBTAG00000003352
23	25426330	25430097	ENSBTAG00000037605	ENSBTAG00000037605
23	25458594	25476944	ENSBTAG00000013919	ENSBTAG00000013919
23	25568481	25579087	ENSBTAG00000038397	ENSBTAG00000038397
23	25587526	25592227	BoLA DR-ALPHA	ENSBTAG00000010645	major histocompatibility complex, class II, DR alpha [Source:HGNC Symbol;Acc:HGNC:4947]
23	25607823	25632464	BTNL2	ENSBTAG00000034939	butyrophilin-like protein 2 [Source:RefSeq peptide;Acc:NP_001095821]
23	25634655	25643394	ENSBTAG00000034945	ENSBTAG00000034945
23	25648712	25656497	ENSBTAG00000007618	ENSBTAG00000007618	butyrophilin-like protein 1 precursor [Source:RefSeq peptide;Acc:NP_001029379]
23	27949626	27961526	VARS2	ENSBTAG00000010698	valyl-tRNA synthetase 2, mitochondrial [Source:VGNC Symbol;Acc:VGNC:36766]
23	27962144	27968734	GTF2H4	ENSBTAG00000046757	general transcription factor IIH subunit 4 [Source:VGNC Symbol;Acc:VGNC:29697]
23	27975619	27989666	DDR1	ENSBTAG00000010682	epithelial discoidin domain-containing receptor 1 precursor [Source:RefSeq peptide;Acc:NP_001069480]
23	28088456	28089722	IER3	ENSBTAG00000011358	immediate early response 3 [Source:VGNC Symbol;Acc:VGNC:30039]
23	28090029	28100113	FLOT1	ENSBTAG00000009960	flotillin 1 [Source:VGNC Symbol;Acc:VGNC:29036]
23	28101727	28105320	TUBB	ENSBTAG00000006969	Tubulin beta-5 chain [Source:UniProtKB/Swiss-Prot;Acc:Q2KJD0]
23	28111675	28114705	NRM	ENSBTAG00000006966	nurim [Source:VGNC Symbol;Acc:VGNC:49560]
23	28117757	28127002	MDC1	ENSBTAG00000025526	mediator of DNA damage checkpoint 1 [Source:VGNC Symbol;Acc:VGNC:31328]
23	28128194	28137021	PPP1R18	ENSBTAG00000039695	protein phosphatase 1 regulatory subunit 18 [Source:VGNC Symbol;Acc:VGNC:33233]
23	28140250	28152483	DHX16	ENSBTAG00000006960	DEAH-box helicase 16 [Source:VGNC Symbol;Acc:VGNC:28049]
23	28152665	28156380	C23H6orf136	ENSBTAG00000006958	uncharacterized protein C6orf136 homolog [Source:RefSeq peptide;Acc:NP_001033267]
23	28156649	28169424	ATAT1	ENSBTAG00000006941	alpha tubulin acetyltransferase 1 [Source:VGNC Symbol;Acc:VGNC:26236]
23	28169926	28176489	MRPS18B	ENSBTAG00000006936	mitochondrial ribosomal protein S18B [Source:VGNC Symbol;Acc:VGNC:50008]
23	28177338	28192982	PPP1R10	ENSBTAG00000006933	protein phosphatase 1 regulatory subunit 10 [Source:VGNC Symbol;Acc:VGNC:33221]
23	28199129	28211340	ABCF1	ENSBTAG00000006927	ATP binding cassette subfamily F member 1 [Source:VGNC Symbol;Acc:VGNC:25480]
23	28218620	28224731	PRR3	ENSBTAG00000006914	Bos taurus proline rich 3 (PRR3), mRNA. [Source:RefSeq mRNA;Acc:NM_001034554]
23	28224609	28231251	GNL1	ENSBTAG00000025516	guanine nucleotide-binding protein-like 1 [Source:RefSeq peptide;Acc:NP_001096742]
23	28257737	28271232	TRIM39-RPP21	ENSBTAG00000007643	TRIM39-RPP21 readthrough [Source:HGNC Symbol;Acc:HGNC:38845]
23	28298189	28298628	ENSBTAG00000001477	ENSBTAG00000001477
23	28299437	28311309	ENSBTAG00000038619	ENSBTAG00000038619	major histocompatibility complex, class I precursor [Source:RefSeq peptide;Acc:NP_001070309]
23	28502524	28506312	BOLA	ENSBTAG00000002069	MHC class I heavy chain isoform 1 precursor [Source:RefSeq peptide;Acc:NP_001033607]
23	28530978	28540122	ENSBTAG00000037421	ENSBTAG00000037421
23	28563086	28579480	TRIM26	ENSBTAG00000035744	tripartite motif containing 26 [Source:HGNC Symbol;Acc:HGNC:12962]
23	28600596	28610740	TRIM15	ENSBTAG00000007532	tripartite motif containing 15 [Source:VGNC Symbol;Acc:VGNC:36316]
23	28613833	28622421	TRIM10	ENSBTAG00000007530	tripartite motif containing 10 [Source:VGNC Symbol;Acc:VGNC:36312]
23	28626339	28638869	TRIM40	ENSBTAG00000037381	tripartite motif containing 40 [Source:HGNC Symbol;Acc:HGNC:18736]
23	28665990	28676508	TRIM31	ENSBTAG00000004490	tripartite motif containing 31 [Source:VGNC Symbol;Acc:VGNC:36327]
23	28707264	28710379	PPP1R11	ENSBTAG00000032247	protein phosphatase 1 regulatory inhibitor subunit 11 [Source:VGNC Symbol;Acc:VGNC:33222]
23	28714470	28717896	ZNRD1	ENSBTAG00000031792	zinc ribbon domain containing 1 [Source:VGNC Symbol;Acc:VGNC:37362]
23	28735960	28739682	ZFP57	ENSBTAG00000017836	ZFP57 zinc finger protein [Source:VGNC Symbol;Acc:VGNC:37165]
23	28739331	28750908	MOG	ENSBTAG00000017818	Myelin-oligodendrocyte glycoprotein [Source:UniProtKB/Swiss-Prot;Acc:P55803]
23	28775534	28803895	GABBR1	ENSBTAG00000017239	gamma-aminobutyric acid type B receptor subunit 1 [Source:VGNC Symbol;Acc:VGNC:29187]
23	28966674	28969399	ENSBTAG00000047014	ENSBTAG00000047014
23	29018639	29019726	ENSBTAG00000047644	ENSBTAG00000047644
23	29078533	29079824	ENSBTAG00000048019	ENSBTAG00000048019
23	29106708	29110560	OR12D2	ENSBTAG00000040188	olfactory receptor, family 12, subfamily D, member 2 [Source:RefSeq peptide;Acc:NP_001091852]
23	29280761	29282962	ENSBTAG00000046777	ENSBTAG00000046777
23	29314810	29315824	ENSBTAG00000038608	ENSBTAG00000038608
23	32029122	32339087	CARMIL1	ENSBTAG00000016549	capping protein regulator and myosin 1 linker 1 [Source:VGNC Symbol;Acc:VGNC:26768]
23	15892878	15893213	ENSBTAG00000012822	ENSBTAG00000012822
23	28950035	28951009	OR10C1	ENSBTAG00000045586	olfactory receptor family 10 subfamily C member 1 (gene/pseudogene) [Source:HGNC Symbol;Acc:HGNC:8165]
23	28955606	28956565	ENSBTAG00000012956	ENSBTAG00000012956
23	28984379	28985359	ENSBTAG00000046934	ENSBTAG00000046934
23	28992088	28993026	ENSBTAG00000031832	ENSBTAG00000031832
23	29004625	29005551	ENSBTAG00000048194	ENSBTAG00000048194
23	29032406	29033332	ENSBTAG00000047763	ENSBTAG00000047763
23	29038753	29039709	ENSBTAG00000031835	ENSBTAG00000031835
23	29061846	29062781	ENSBTAG00000046892	ENSBTAG00000046892
23	29071805	29072731	ENSBTAG00000047829	ENSBTAG00000047829
23	29092562	29093488	ENSBTAG00000039390	ENSBTAG00000039390
23	29122354	29123280	ENSBTAG00000039683	ENSBTAG00000039683
23	29143512	29144489	ENSBTAG00000039116	ENSBTAG00000039116
23	29149938	29150906	OR12D3	ENSBTAG00000039562	olfactory receptor family 12 subfamily D member 3 [Source:HGNC Symbol;Acc:HGNC:13963]
23	29206927	29207889	ENSBTAG00000013654	ENSBTAG00000013654
23	29223821	29224756	ENSBTAG00000031843	ENSBTAG00000031843
23	29241755	29242690	ENSBTAG00000039534	ENSBTAG00000039534
23	29290572	29291495	ENSBTAG00000047086	ENSBTAG00000047086
23	29299942	29300874	ENSBTAG00000046023	ENSBTAG00000046023
23	29327118	29328065	ENSBTAG00000000228	ENSBTAG00000000228
23	28203151	28203252	bta-mir-877	ENSBTAG00000037337	bta-mir-877 [Source:miRBase;Acc:MI0009903]
23	28178036	28178111	ENSBTAG00000043729	ENSBTAG00000043729
23	28202778	28202855	bta-mir-2378	ENSBTAG00000044647	bta-mir-2378 [Source:miRBase;Acc:MI0011413]
23	24977642	24977972	ENSBTAG00000043250	ENSBTAG00000043250
23	24312330	24312413	bta-mir-133b	ENSBTAG00000029826	bta-mir-133b [Source:miRBase;Acc:MI0009734]
23	24308042	24308127	bta-mir-206	ENSBTAG00000036400	bta-mir-206 [Source:miRBase;Acc:MI0009772]
23	25080359	25080477	ENSBTAG00000032624	ENSBTAG00000032624
23	28601333	28601408	ENSBTAG00000044550	ENSBTAG00000044550
24	22445691	22767026	DTNA	ENSBTAG00000012307	dystrobrevin alpha [Source:VGNC Symbol;Acc:VGNC:28231]
24	41576970	41689810	MTCL1	ENSBTAG00000009459	microtubule crosslinking factor 1 [Source:VGNC Symbol;Acc:VGNC:31718]
24	46018902	46034227	SIGLEC15	ENSBTAG00000016620	sialic acid binding Ig like lectin 15 [Source:VGNC Symbol;Acc:VGNC:34618]
24	46047185	46162188	EPG5	ENSBTAG00000012067	ectopic P-granules autophagy protein 5 homolog [Source:VGNC Symbol;Acc:VGNC:28531]
24	58886144	58924772	CCBE1	ENSBTAG00000008723	collagen and calcium binding EGF domains 1 [Source:VGNC Symbol;Acc:VGNC:26828]
24	46051054	46051160	ENSBTAG00000028153	ENSBTAG00000028153
24	27484195	27484281	ENSBTAG00000044228	ENSBTAG00000044228
24	28822883	28823043	ENSBTAG00000028575	ENSBTAG00000028575
24	48564978	48565084	ENSBTAG00000043142	ENSBTAG00000043142
24	48503025	48503130	ENSBTAG00000043251	ENSBTAG00000043251
26	20400227	20403772	NKX2-3	ENSBTAG00000021397	NK2 homeobox 3 [Source:VGNC Symbol;Acc:VGNC:32100]
26	20466104	20476402	SLC25A28	ENSBTAG00000012107	solute carrier family 25 member 28 [Source:VGNC Symbol;Acc:VGNC:34754]
26	20494069	20524328	ENTPD7	ENSBTAG00000047077	ectonucleoside triphosphate diphosphohydrolase 7 [Source:VGNC Symbol;Acc:VGNC:28512]
26	21056133	21108833	PKD2L1	ENSBTAG00000010742	polycystin 2 like 1, transient receptor potential cation channel [Source:VGNC Symbol;Acc:VGNC:32936]
26	21132751	21133969	ENSBTAG00000047957	ENSBTAG00000047957
26	21141592	21148318	SCD	ENSBTAG00000045728	acyl-CoA desaturase [Source:RefSeq peptide;Acc:NP_776384]
26	21240570	21244552	WNT8B	ENSBTAG00000012914	Wnt family member 8B [Source:VGNC Symbol;Acc:VGNC:36965]
26	21248525	21280208	SEC31B	ENSBTAG00000000090	SEC31 homolog B, COPII coat complex component [Source:VGNC Symbol;Acc:VGNC:34418]
26	21283406	21288806	NDUFB8	ENSBTAG00000000091	NADH dehydrogenase [ubiquinone] 1 beta subcomplex subunit 8, mitochondrial [Source:UniProtKB/Swiss-Prot;Acc:Q02372]
26	21291076	21300157	HIF1AN	ENSBTAG00000000092	hypoxia inducible factor 1 alpha subunit inhibitor [Source:VGNC Symbol;Acc:VGNC:29849]
26	22001775	22172725	BTRC	ENSBTAG00000007476	beta-transducin repeat containing E3 ubiquitin protein ligase [Source:VGNC Symbol;Acc:VGNC:26603]
26	22375029	22380835	FGF8	ENSBTAG00000001530	fibroblast growth factor 8 [Source:VGNC Symbol;Acc:VGNC:28983]
26	22385932	22388123	NPM3	ENSBTAG00000016335	nucleophosmin/nucleoplasmin 3 [Source:VGNC Symbol;Acc:VGNC:32208]
26	22390930	22417746	MGEA5	ENSBTAG00000016336	meningioma expressed antigen 5 (hyaluronidase) [Source:HGNC Symbol;Acc:HGNC:7056]
26	22422214	22440709	KCNIP2	ENSBTAG00000016343	potassium voltage-gated channel interacting protein 2 [Source:VGNC Symbol;Acc:VGNC:30451]
26	22446522	22608433	C10orf76	ENSBTAG00000013120	chromosome 10 open reading frame 76 [Source:HGNC Symbol;Acc:HGNC:25788]
26	23795436	23972895	CNNM2	ENSBTAG00000012857	cyclin and CBS domain divalent metal cation transport mediator 2 [Source:VGNC Symbol;Acc:VGNC:27511]
26	23983206	24080557	NT5C2	ENSBTAG00000012858	5'-nucleotidase, cytosolic II [Source:VGNC Symbol;Acc:VGNC:32291]
26	24700354	24737868	STN1	ENSBTAG00000015019	STN1, CST complex subunit [Source:VGNC Symbol;Acc:VGNC:35408]
26	24786360	24844579	SLK	ENSBTAG00000001017	STE20 like kinase [Source:VGNC Symbol;Acc:VGNC:34968]
26	24848931	24896345	COL17A1	ENSBTAG00000002430	collagen type XVII alpha 1 chain [Source:VGNC Symbol;Acc:VGNC:27558]
26	42041629	42198853	ATE1	ENSBTAG00000003178	arginyltransferase 1 [Source:VGNC Symbol;Acc:VGNC:26238]
26	22391794	22391902	ENSBTAG00000044417	ENSBTAG00000044417
26	20371949	20372055	ENSBTAG00000043254	ENSBTAG00000043254
28	25631917	25647735	SRGN	ENSBTAG00000017863	serglycin [Source:VGNC Symbol;Acc:VGNC:35280]
28	25643317	25643386	ENSBTAG00000042258	ENSBTAG00000042258
28	25549743	25549846	ENSBTAG00000042905	ENSBTAG00000042905
28	25643113	25643192	ENSBTAG00000042264	ENSBTAG00000042264
29	6147990	6326526	NOX4	ENSBTAG00000018540	NADPH oxidase 4 [Source:VGNC Symbol;Acc:VGNC:32184]
29	37638817	37654922	MS4A8	ENSBTAG00000009289	membrane spanning 4-domains A8 [Source:VGNC Symbol;Acc:VGNC:31687]
29	37667234	37684931	MS4A18	ENSBTAG00000038312	membrane spanning 4-domains A18 [Source:VGNC Symbol;Acc:VGNC:31684]
29	37695483	37703529	MS4A15	ENSBTAG00000039461	membrane spanning 4-domains A15 [Source:HGNC Symbol;Acc:HGNC:28573]
29	37718326	37725179	MS4A10	ENSBTAG00000001734	membrane spanning 4-domains A10 [Source:HGNC Symbol;Acc:HGNC:13368]
29	37751108	37759830	CCDC86	ENSBTAG00000014215	coiled-coil domain-containing protein 86 [Source:RefSeq peptide;Acc:NP_001033663]
29	37842838	37856699	TMEM132A	ENSBTAG00000018364	transmembrane protein 132A [Source:VGNC Symbol;Acc:VGNC:35965]
29	37856702	37871618	SLC15A3	ENSBTAG00000018366	solute carrier family 15 member 3 [Source:VGNC Symbol;Acc:VGNC:34680]
29	37892577	37937146	CD6	ENSBTAG00000018367	CD6 molecule [Source:VGNC Symbol;Acc:VGNC:27041]
29	43997381	44003325	SYVN1	ENSBTAG00000005076	E3 ubiquitin-protein ligase synoviolin [Source:RefSeq peptide;Acc:NP_001095369]
29	44049774	44051704	SPDYC	ENSBTAG00000005772	speedy/RINGO cell cycle regulator family member C [Source:VGNC Symbol;Acc:VGNC:35199]
29	44064429	44089990	CAPN1	ENSBTAG00000010230	calpain 1 [Source:VGNC Symbol;Acc:VGNC:26740]
29	44092127	44114038	ENSBTAG00000010233	ENSBTAG00000010233
29	44143171	44170094	POLA2	ENSBTAG00000011455	DNA polymerase alpha 2, accessory subunit [Source:VGNC Symbol;Acc:VGNC:33111]
29	44189278	44195090	CDC42EP2	ENSBTAG00000032089	CDC42 effector protein 2 [Source:VGNC Symbol;Acc:VGNC:27073]
29	44205032	44217694	DPF2	ENSBTAG00000003077	double PHD fingers 2 [Source:VGNC Symbol;Acc:VGNC:28176]
29	44235985	44240528	SLC25A45	ENSBTAG00000008568	solute carrier family 25 member 45 [Source:VGNC Symbol;Acc:VGNC:34770]
29	44248435	44269691	FRMD8	ENSBTAG00000002039	FERM domain containing 8 [Source:HGNC Symbol;Acc:HGNC:25462]
29	44370408	44381438	SCYL1	ENSBTAG00000006740	SCY1 like pseudokinase 1 [Source:VGNC Symbol;Acc:VGNC:34374]
29	44380356	44400578	LTBP3	ENSBTAG00000006747	latent transforming growth factor beta binding protein 3 [Source:VGNC Symbol;Acc:VGNC:31073]
29	44418400	44419658	SSSCA1	ENSBTAG00000003713	Sjoegren syndrome/scleroderma autoantigen 1 [Source:RefSeq peptide;Acc:NP_001033617]
29	44420406	44422038	FAM89B	ENSBTAG00000003712	family with sequence similarity 89 member B [Source:VGNC Symbol;Acc:VGNC:28843]
29	44424071	44439541	EHBP1L1	ENSBTAG00000009554	Bos taurus EH domain binding protein 1 like 1 (EHBP1L1), mRNA. [Source:RefSeq mRNA;Acc:NM_001354719]
29	44439783	44442568	KCNK7	ENSBTAG00000010802	potassium two pore domain channel subfamily K member 7 [Source:VGNC Symbol;Acc:VGNC:30477]
29	44444057	44460617	MAP3K11	ENSBTAG00000004114	mitogen-activated protein kinase kinase kinase 11 [Source:VGNC Symbol;Acc:VGNC:31189]
29	44496359	44505000	RELA	ENSBTAG00000013895	RELA proto-oncogene, NF-kB subunit [Source:VGNC Symbol;Acc:VGNC:33858]
29	44544726	44552254	KAT5	ENSBTAG00000005578	lysine acetyltransferase 5 [Source:VGNC Symbol;Acc:VGNC:30400]
29	44552309	44553484	RNASEH2C	ENSBTAG00000005577	ribonuclease H2 subunit C [Source:VGNC Symbol;Acc:VGNC:34001]
29	44563255	44566140	AP5B1	ENSBTAG00000046875	adaptor related protein complex 5 beta 1 subunit [Source:VGNC Symbol;Acc:VGNC:25995]
29	44574560	44585598	OVOL1	ENSBTAG00000012656	ovo like transcriptional repressor 1 [Source:VGNC Symbol;Acc:VGNC:32505]
29	44583536	44584162	ENSBTAG00000047811	ENSBTAG00000047811
29	44620751	44624231	ENSBTAG00000046150	ENSBTAG00000046150
29	44634185	44637443	SNX32	ENSBTAG00000021454	sorting nexin 32 [Source:HGNC Symbol;Acc:HGNC:26423]
29	44638896	44642280	CFL1	ENSBTAG00000021455	cofilin 1 [Source:VGNC Symbol;Acc:VGNC:27253]
29	44644885	44650618	MUS81	ENSBTAG00000021456	MUS81 structure-specific endonuclease subunit [Source:VGNC Symbol;Acc:VGNC:31762]
29	44650628	44657896	EFEMP2	ENSBTAG00000021457	EGF containing fibulin extracellular matrix protein 2 [Source:VGNC Symbol;Acc:VGNC:28349]
29	44661698	44665098	CTSW	ENSBTAG00000020773	cathepsin W [Source:VGNC Symbol;Acc:VGNC:27819]
29	44665294	44669337	FIBP	ENSBTAG00000020775	FGF1 intracellular binding protein [Source:VGNC Symbol;Acc:VGNC:29006]
29	44673879	44679325	FOSL1	ENSBTAG00000006194	FOS like 1, AP-1 transcription factor subunit [Source:VGNC Symbol;Acc:VGNC:29075]
29	44691682	44693901	C29H11orf68	ENSBTAG00000006195	chromosome 11 open reading frame 68 [Source:HGNC Symbol;Acc:HGNC:28801]
29	44694171	44696295	DRAP1	ENSBTAG00000006199	DR1 associated protein 1 [Source:VGNC Symbol;Acc:VGNC:28203]
29	44716272	44725594	TSGA10IP	ENSBTAG00000003093	testis specific 10 interacting protein [Source:VGNC Symbol;Acc:VGNC:36416]
29	44726692	44741763	SART1	ENSBTAG00000003094	SART1, U4/U6.U5 tri-snRNP-associated protein 1 [Source:VGNC Symbol;Acc:VGNC:34292]
29	44756084	44759164	EIF1AD	ENSBTAG00000020186	eukaryotic translation initiation factor 1A domain containing [Source:VGNC Symbol;Acc:VGNC:28377]
29	44759486	44761429	BANF1	ENSBTAG00000031875	Barrier-to-autointegration factor Barrier-to-autointegration factor, N-terminally processed [Source:UniProtKB/Swiss-Prot;Acc:P61283]
29	44766936	44768173	CST6	ENSBTAG00000014718	cystatin-M precursor [Source:RefSeq peptide;Acc:NP_001012782]
29	44770865	44771529	ENSBTAG00000046587	ENSBTAG00000046587
29	44772899	44779138	ENSBTAG00000014720	ENSBTAG00000014720
29	44790176	44800852	GAL3ST3	ENSBTAG00000002772	galactose-3-O-sulfotransferase 3 [Source:VGNC Symbol;Acc:VGNC:29215]
29	44221929	44223344	TIGD3	ENSBTAG00000003079	tigger transposable element derived 3 [Source:VGNC Symbol;Acc:VGNC:35865]
29	44671368	44672651	CCDC85B	ENSBTAG00000005382	coiled-coil domain containing 85B [Source:VGNC Symbol;Acc:VGNC:26924]
29	37761271	37762491	PTGDR2	ENSBTAG00000039652	prostaglandin D2 receptor 2 [Source:VGNC Symbol;Acc:VGNC:33500]
29	44088087	44088159	bta-mir-2407	ENSBTAG00000044262	bta-mir-2407 [Source:miRBase;Acc:MI0011450]

## Sheet: S8
Supplemenatry Table S8 | List of candidate selection signatures regions and related genes in Jersey based on iHS test
Chr	Gene start (bp)	Gene end (bp)	Gene name	Gene stable ID	Gene description
1	1467704	1496151	IFNAR1	ENSBTAG00000021819	interferon alpha and beta receptor subunit 1 [Source:VGNC Symbol;Acc:VGNC:30054]
1	1563137	1591758	IL10RB	ENSBTAG00000019404	interleukin-10 receptor subunit beta precursor [Source:RefSeq peptide;Acc:NP_001070443]
1	1593295	1627137	IFNAR2	ENSBTAG00000015212	interferon alpha and beta receptor subunit 2 [Source:VGNC Symbol;Acc:VGNC:30055]
1	42518056	42531538	CPOX	ENSBTAG00000004124	coproporphyrinogen oxidase [Source:VGNC Symbol;Acc:VGNC:27667]
1	42566823	42571545	ENSBTAG00000023666	ENSBTAG00000023666
1	43541936	43717619	COL8A1	ENSBTAG00000013662	collagen type VIII alpha 1 chain [Source:VGNC Symbol;Acc:VGNC:27574]
1	45281219	45394335	TMEM45A	ENSBTAG00000004459	transmembrane protein 45A [Source:RefSeq peptide;Acc:NP_001068873]
1	45415066	45478330	ADGRG7	ENSBTAG00000012140	adhesion G protein-coupled receptor G7 [Source:VGNC Symbol;Acc:VGNC:25670]
1	45489052	45521372	TFG	ENSBTAG00000016363	protein TFG [Source:RefSeq peptide;Acc:NP_001179905]
1	46355783	46370616	PCNP	ENSBTAG00000015069	PEST proteolytic signal containing nuclear protein [Source:VGNC Symbol;Acc:VGNC:32636]
1	46382671	46412050	ZBTB11	ENSBTAG00000013460	zinc finger and BTB domain containing 11 [Source:VGNC Symbol;Acc:VGNC:37059]
1	46415223	46420721	RPL24	ENSBTAG00000013461	ribosomal protein L24 [Source:VGNC Symbol;Acc:VGNC:34113]
1	46431094	46452391	CEP97	ENSBTAG00000013464	centrosomal protein 97 [Source:HGNC Symbol;Acc:HGNC:26244]
1	46464509	46518744	NXPE3	ENSBTAG00000013465	neurexophilin and PC-esterase domain family member 3 [Source:VGNC Symbol;Acc:VGNC:32380]
1	66213612	66537723	STXBP5L	ENSBTAG00000001918	syntaxin binding protein 5 like [Source:VGNC Symbol;Acc:VGNC:35449]
1	66552011	66659954	POLQ	ENSBTAG00000001920	DNA polymerase theta [Source:VGNC Symbol;Acc:VGNC:33130]
1	67722242	67810789	DIRC2	ENSBTAG00000005071	disrupted in renal carcinoma 2 [Source:HGNC Symbol;Acc:HGNC:16628]
1	67840125	67878028	SEMA5B	ENSBTAG00000018765	semaphorin 5B [Source:VGNC Symbol;Acc:VGNC:34440]
1	72572941	72608810	BDH1	ENSBTAG00000000448	3-hydroxybutyrate dehydrogenase 1 [Source:VGNC Symbol;Acc:VGNC:26457]
1	72670963	72684269	APOD	ENSBTAG00000023600	apolipoprotein D [Source:VGNC Symbol;Acc:VGNC:26031]
1	72935318	73105267	XXYLT1	ENSBTAG00000014564	xyloside xylosyltransferase 1 [Source:HGNC Symbol;Acc:HGNC:26639]
1	23767708	23767826	ENSBTAG00000047674	ENSBTAG00000047674
1	42547015	42547151	ENSBTAG00000044934	ENSBTAG00000044934
1	73230876	73230948	ENSBTAG00000044535	ENSBTAG00000044535
1	23770026	23770144	ENSBTAG00000048144	ENSBTAG00000048144
2	15026225	15113323	CERKL	ENSBTAG00000009257	ceramide kinase like [Source:VGNC Symbol;Acc:VGNC:27223]
2	15115673	15207508	ITGA4	ENSBTAG00000009256	integrin subunit alpha 4 [Source:VGNC Symbol;Acc:VGNC:30316]
2	90278155	90301820	CASP8	ENSBTAG00000015718	caspase 8 [Source:VGNC Symbol;Acc:VGNC:26784]
2	90302815	90340658	ALS2CR12	ENSBTAG00000012334	amyotrophic lateral sclerosis 2 chromosome region 12 [Source:HGNC Symbol;Acc:HGNC:14439]
2	90355099	90397117	TRAK2	ENSBTAG00000014933	trafficking kinesin protein 2 [Source:VGNC Symbol;Acc:VGNC:36281]
2	133502454	133607696	TMCO4	ENSBTAG00000007998	transmembrane and coiled-coil domains 4 [Source:VGNC Symbol;Acc:VGNC:35931]
2	133610639	133623061	HTR6	ENSBTAG00000007996	5-hydroxytryptamine receptor 6 [Source:VGNC Symbol;Acc:VGNC:30002]
2	133632742	133634622	NBL1	ENSBTAG00000005140	neuroblastoma 1, DAN family BMP antagonist [Source:HGNC Symbol;Acc:HGNC:7650]
3	95218	96237	ENSBTAG00000003249	ENSBTAG00000003249
3	195880	208733	ENSBTAG00000000584	ENSBTAG00000000584
3	3692343	3865786	LMX1A	ENSBTAG00000012025	LIM homeobox transcription factor 1 alpha [Source:VGNC Symbol;Acc:VGNC:30943]
3	24105659	24200029	WARS2	ENSBTAG00000005064	tryptophanyl tRNA synthetase 2, mitochondrial [Source:VGNC Symbol;Acc:VGNC:36864]
3	24236815	24359735	TBX15	ENSBTAG00000007767	T-box transcription factor TBX15 [Source:RefSeq peptide;Acc:NP_001073243]
3	28364796	28449607	TSPAN2	ENSBTAG00000015961	tetraspanin 2 [Source:VGNC Symbol;Acc:VGNC:36435]
3	28419563	28424798	TSHB	ENSBTAG00000006295	thyroid stimulating hormone beta [Source:VGNC Symbol;Acc:VGNC:36418]
3	28442747	28587650	SYCP1	ENSBTAG00000032071	synaptonemal complex protein 1 [Source:VGNC Symbol;Acc:VGNC:35508]
3	39998006	40025400	RNPC3	ENSBTAG00000019091	RNA-binding protein 40 [Source:RefSeq peptide;Acc:NP_001070585]
3	57643206	57674223	CLCA4	ENSBTAG00000017357	chloride channel accessory 4 [Source:HGNC Symbol;Acc:HGNC:2018]
3	57702753	57736671	CLCA1	ENSBTAG00000008161	chloride channel accessory 1 [Source:VGNC Symbol;Acc:VGNC:27392]
3	57750913	57792193	CLCA2	ENSBTAG00000038215	chloride channel accessory 2 [Source:VGNC Symbol;Acc:VGNC:27393]
3	94837405	94859216	BTF3L4	ENSBTAG00000011025	basic transcription factor 3 like 4 [Source:VGNC Symbol;Acc:VGNC:26596]
3	94860380	94895914	TXNDC12	ENSBTAG00000011024	thioredoxin domain containing 12 [Source:VGNC Symbol;Acc:VGNC:36535]
3	28485589	28485684	ENSBTAG00000045068	ENSBTAG00000045068
3	134490	134615	ENSBTAG00000047189	ENSBTAG00000047189
4	10372349	10419397	HEPACAM2	ENSBTAG00000012456	HEPACAM family member 2 [Source:VGNC Symbol;Acc:VGNC:29811]
4	10432174	10564199	VPS50	ENSBTAG00000014255	VPS50, EARP/GARPII complex subunit [Source:VGNC Symbol;Acc:VGNC:36826]
4	11735528	11787909	CASD1	ENSBTAG00000009109	CAS1 domain containing 1 [Source:VGNC Symbol;Acc:VGNC:26775]
4	11840470	11911742	SGCE	ENSBTAG00000021282	sarcoglycan epsilon [Source:VGNC Symbol;Acc:VGNC:34538]
4	64985737	65050206	PDE1C	ENSBTAG00000002739	phosphodiesterase 1C [Source:VGNC Symbol;Acc:VGNC:32673]
4	79444243	79758476	GLI3	ENSBTAG00000010671	GLI family zinc finger 3 [Source:VGNC Symbol;Acc:VGNC:29401]
4	86250173	86572861	CPED1	ENSBTAG00000002938	cadherin like and PC-esterase domain containing 1 [Source:VGNC Symbol;Acc:VGNC:27651]
4	95807761	96016756	MKLN1	ENSBTAG00000010437	Bos taurus muskelin 1 (MKLN1), mRNA. [Source:RefSeq mRNA;Acc:NM_001097999]
4	96032591	96039050	ENSBTAG00000010452	ENSBTAG00000010452
4	10302667	10307412	SAMD9	ENSBTAG00000012894	sterile alpha motif domain containing 9 [Source:HGNC Symbol;Acc:HGNC:1348]
5	67612447	67784730	STAB2	ENSBTAG00000006010	stabilin 2 [Source:VGNC Symbol;Acc:VGNC:35349]
6	58599882	58660258	RELL1	ENSBTAG00000004329	RELT like 1 [Source:VGNC Symbol;Acc:VGNC:33860]
6	58779368	58816666	PGM2	ENSBTAG00000005773	Bos taurus phosphoglucomutase 2 (PGM2), mRNA. [Source:RefSeq mRNA;Acc:NM_001304966]
6	86676447	86713666	ENSBTAG00000015047	ENSBTAG00000015047	uncharacterized protein LOC781988 precursor [Source:RefSeq peptide;Acc:NP_001094751]
6	86810496	86835733	UGT2A1	ENSBTAG00000004040	UDP-glucuronosyltransferase 2A1 precursor [Source:RefSeq peptide;Acc:NP_001092414]
6	90291078	90312046	AFM	ENSBTAG00000047833	afamin [Source:VGNC Symbol;Acc:VGNC:25715]
6	90373220	90400848	RASSF6	ENSBTAG00000011935	Ras association domain family member 6 [Source:VGNC Symbol;Acc:VGNC:33762]
6	111785061	111785127	ENSBTAG00000044366	ENSBTAG00000044366
6	96128405	96128509	ENSBTAG00000043942	ENSBTAG00000043942
7	6703832	6705051	ENSBTAG00000047589	ENSBTAG00000047589
7	7820650	7850254	AP1M1	ENSBTAG00000013329	adaptor related protein complex 1 mu 1 subunit [Source:VGNC Symbol;Acc:VGNC:25979]
7	7854536	7861328	FAM32A	ENSBTAG00000046846	Protein FAM32A [Source:UniProtKB/Swiss-Prot;Acc:A6QR31]
7	7873255	7883711	CIB3	ENSBTAG00000016179	calcium and integrin binding family member 3 [Source:VGNC Symbol;Acc:VGNC:27361]
7	7886059	7894496	HSH2D	ENSBTAG00000038154	hematopoietic SH2 domain containing [Source:VGNC Symbol;Acc:VGNC:29986]
7	7899037	7919167	RAB8A	ENSBTAG00000038696	RAB8A, member RAS oncogene family [Source:VGNC Symbol;Acc:VGNC:33662]
7	25612682	25879965	ADAMTS19	ENSBTAG00000016145	ADAM metallopeptidase with thrombospondin type 1 motif 19 [Source:VGNC Symbol;Acc:VGNC:25623]
7	26174298	26197424	ISOC1	ENSBTAG00000000341	isochorismatase domain containing 1 [Source:VGNC Symbol;Acc:VGNC:30301]
7	26237929	26329594	SLC27A6	ENSBTAG00000004860	solute carrier family 27 member 6 [Source:VGNC Symbol;Acc:VGNC:34790]
7	26697477	26917267	FBN2	ENSBTAG00000015307	fibrillin-2 precursor [Source:RefSeq peptide;Acc:NP_001265517]
7	27685132	27723230	PRRC1	ENSBTAG00000021977	proline rich coiled-coil 1 [Source:VGNC Symbol;Acc:VGNC:33403]
7	36197353	36269226	DTWD2	ENSBTAG00000002143	DTW domain containing 2 [Source:VGNC Symbol;Acc:VGNC:28235]
7	41934348	41975651	ZNF496	ENSBTAG00000038284	zinc finger protein 496 [Source:HGNC Symbol;Acc:HGNC:23713]
7	42028059	42075814	NLRP3	ENSBTAG00000001273	NLR family pyrin domain containing 3 [Source:VGNC Symbol;Acc:VGNC:32117]
7	43654027	43655001	ENSBTAG00000017588	ENSBTAG00000017588
7	43823209	43837867	MGC137030	ENSBTAG00000024809
7	43851496	43862151	LYPD8	ENSBTAG00000030711	LY6/PLAUR domain containing 8 [Source:VGNC Symbol;Acc:VGNC:31105]
7	45789552	45801206	KLF16	ENSBTAG00000038055	Kruppel like factor 16 [Source:HGNC Symbol;Acc:HGNC:16857]
7	45808716	45816928	ABHD17A	ENSBTAG00000025277	abhydrolase domain containing 17A [Source:VGNC Symbol;Acc:VGNC:25497]
7	45838685	45856001	SCAMP4	ENSBTAG00000045762	secretory carrier membrane protein 4 [Source:VGNC Symbol;Acc:VGNC:34318]
7	45879083	45887704	CSNK1G2	ENSBTAG00000016797	casein kinase 1 gamma 2 [Source:VGNC Symbol;Acc:VGNC:27767]
7	45901193	45923944	BTBD2	ENSBTAG00000016108	BTB domain containing 2 [Source:VGNC Symbol;Acc:VGNC:26589]
7	46035068	46038731	SHROOM1	ENSBTAG00000014676	shroom family member 1 [Source:VGNC Symbol;Acc:VGNC:34608]
7	47231929	47244897	C7H5orf15	ENSBTAG00000013112	chromosome 5 open reading frame 15 [Source:HGNC Symbol;Acc:HGNC:20656]
7	47247744	47273458	VDAC1	ENSBTAG00000013113	voltage dependent anion channel 1 [Source:VGNC Symbol;Acc:VGNC:36782]
7	53047810	53118491	CYSTM1	ENSBTAG00000016595	cysteine rich transmembrane module containing 1 [Source:VGNC Symbol;Acc:VGNC:50308]
7	53119765	53193428	PFDN1	ENSBTAG00000016596	prefoldin subunit 1 [Source:VGNC Symbol;Acc:VGNC:32766]
7	60450229	60579589	STK32A	ENSBTAG00000000626	serine/threonine kinase 32A [Source:VGNC Symbol;Acc:VGNC:35394]
7	60588659	60703487	DPYSL3	ENSBTAG00000010661	dihydropyrimidinase like 3 [Source:VGNC Symbol;Acc:VGNC:28196]
7	43686275	43687228	ENSBTAG00000030714	ENSBTAG00000030714
7	43706043	43706999	ENSBTAG00000047415	ENSBTAG00000047415
7	43739515	43740444	ENSBTAG00000047519	ENSBTAG00000047519
7	43809453	43810403	ENSBTAG00000016065	ENSBTAG00000016065
7	45995154	45995312	ENSBTAG00000046234	ENSBTAG00000046234
7	46023822	46025519	SOWAHA	ENSBTAG00000003671	sosondowah ankyrin repeat domain family member A [Source:VGNC Symbol;Acc:VGNC:35137]
7	88995196	88995993	ENSBTAG00000037434	ENSBTAG00000037434
7	7809394	7809519	ENSBTAG00000042477	ENSBTAG00000042477
7	43673389	43673492	ENSBTAG00000043311	ENSBTAG00000043311
7	36582450	36582515	ENSBTAG00000045191	ENSBTAG00000045191
7	42021611	42021717	ENSBTAG00000042263	ENSBTAG00000042263
8	46594200	46690016	MAMDC2	ENSBTAG00000017369	MAM domain containing 2 [Source:VGNC Symbol;Acc:VGNC:31157]
9	96806294	96815764	TAGAP	ENSBTAG00000031701	T cell activation RhoGTPase activating protein [Source:VGNC Symbol;Acc:VGNC:35584]
9	98421510	99568077	PRKN	ENSBTAG00000018996	parkin RBR E3 ubiquitin protein ligase [Source:VGNC Symbol;Acc:VGNC:33342]
10	10945425	10999244	THBS4	ENSBTAG00000012866	thrombospondin 4 [Source:VGNC Symbol;Acc:VGNC:35831]
10	11033434	11033780	ENSBTAG00000034463	ENSBTAG00000034463
10	11052483	11103578	SERINC5	ENSBTAG00000001619	serine incorporator 5 [Source:VGNC Symbol;Acc:VGNC:34463]
10	73628027	73629463	ENSBTAG00000047000	ENSBTAG00000047000
10	81023526	81121590	ACTN1	ENSBTAG00000018255	actinin alpha 1 [Source:VGNC Symbol;Acc:VGNC:25581]
10	81194836	81259609	DCAF5	ENSBTAG00000021225	DDB1 and CUL4 associated factor 5 [Source:VGNC Symbol;Acc:VGNC:27905]
10	73648527	73649642	TMEM30B	ENSBTAG00000016713	transmembrane protein 30B [Source:VGNC Symbol;Acc:VGNC:36075]
10	73514417	73514519	ENSBTAG00000042567	ENSBTAG00000042567
10	81143497	81143603	ENSBTAG00000042977	ENSBTAG00000042977
10	73632148	73632220	ENSBTAG00000045169	ENSBTAG00000045169
10	81098622	81098728	ENSBTAG00000042854	ENSBTAG00000042854
11	38511117	38511202	bta-mir-216b	ENSBTAG00000030046	bta-mir-216b [Source:miRBase;Acc:MI0009778]
12	21512688	21561888	NEK5	ENSBTAG00000019134	NIMA related kinase 5 [Source:VGNC Symbol;Acc:VGNC:31996]
12	21570400	21593686	NEK3	ENSBTAG00000020612	NIMA related kinase 3 [Source:VGNC Symbol;Acc:VGNC:31994]
12	21600280	21625618	CKAP2	ENSBTAG00000021162	cytoskeleton associated protein 2 [Source:VGNC Symbol;Acc:VGNC:27380]
12	21633580	21665112	VPS36	ENSBTAG00000004307	vacuolar protein sorting 36 homolog [Source:VGNC Symbol;Acc:VGNC:36819]
12	64197136	64197240	ENSBTAG00000047066	ENSBTAG00000047066
13	422889	424810	ENSBTAG00000025720	ENSBTAG00000025720
13	29501668	29578090	FAM107B	ENSBTAG00000010023	protein FAM107B [Source:RefSeq peptide;Acc:NP_001039858]
13	30340780	30527982	ITGA8	ENSBTAG00000007602	integrin subunit alpha 8 [Source:VGNC Symbol;Acc:VGNC:30319]
13	34860211	34965895	ENSBTAG00000027444	ENSBTAG00000027444
13	35065347	35065642	ENSBTAG00000046352	ENSBTAG00000046352
13	36610252	36833259	MPP7	ENSBTAG00000017354	membrane palmitoylated protein 7 [Source:VGNC Symbol;Acc:VGNC:31586]
13	61523659	61533444	DEFB119	ENSBTAG00000003364	Beta-defensin 119 [Source:UniProtKB/Swiss-Prot;Acc:Q32P86]
13	61562053	61566096	DEFB122A	ENSBTAG00000027384
13	61572838	61577455	DEFB122	ENSBTAG00000027383
13	61584391	61595672	DEFB123	ENSBTAG00000020555	beta-defensin 123 precursor [Source:RefSeq peptide;Acc:NP_001095813]
13	61612683	61615456	DEFB124	ENSBTAG00000031254	defensin beta 124 [Source:VGNC Symbol;Acc:VGNC:27988]
13	61619569	61628687	REM1	ENSBTAG00000014176	RRAD and GEM like GTPase 1 [Source:VGNC Symbol;Acc:VGNC:33863]
13	61644664	61683597	HM13	ENSBTAG00000008840	histocompatibility minor 13 [Source:VGNC Symbol;Acc:VGNC:29868]
13	65366076	65405852	CEP250	ENSBTAG00000006021	centrosomal protein 250 [Source:VGNC Symbol;Acc:VGNC:27200]
13	65424262	65426839	ENSBTAG00000030976	ENSBTAG00000030976
13	65435601	65448951	ERGIC3	ENSBTAG00000006670	ERGIC and golgi 3 [Source:VGNC Symbol;Acc:VGNC:28580]
13	65499318	65504023	SPAG4	ENSBTAG00000006949	sperm associated antigen 4 [Source:VGNC Symbol;Acc:VGNC:35166]
13	66306260	66314230	MYL9	ENSBTAG00000011473
13	66334680	66351481	TGIF2	ENSBTAG00000005286	TGFB induced factor homeobox 2 [Source:VGNC Symbol;Acc:VGNC:35808]
13	66362562	66369978	C13H20orf24	ENSBTAG00000021805	TGIF2-C20orf24 readthrough [Source:HGNC Symbol;Acc:HGNC:44664]
13	66368694	66395549	SLA2	ENSBTAG00000040607	Src like adaptor 2 [Source:VGNC Symbol;Acc:VGNC:34651]
13	66398147	66594149	NDRG3	ENSBTAG00000019621	NDRG family member 3 [Source:VGNC Symbol;Acc:VGNC:31940]
13	66433853	66442685	TLDC2	ENSBTAG00000022005	TBC/LysM-associated domain containing 2 [Source:VGNC Symbol;Acc:VGNC:35890]
13	66567169	66730589	RBL1	ENSBTAG00000011541	RB transcriptional corepressor like 1 [Source:VGNC Symbol;Acc:VGNC:33781]
13	66742862	66794243	MROH8	ENSBTAG00000013737	maestro heat like repeat family member 8 [Source:VGNC Symbol;Acc:VGNC:50026]
13	66799465	66853779	RPN2	ENSBTAG00000014648	ribophorin II [Source:VGNC Symbol;Acc:VGNC:34120]
13	67102207	67118598	ENSBTAG00000045928	ENSBTAG00000045928
13	67114713	67125217	BLCAP	ENSBTAG00000003209	Bladder cancer-associated protein [Source:UniProtKB/Swiss-Prot;Acc:P62954]
13	67118490	67120879	NNAT	ENSBTAG00000003212	neuronatin [Source:VGNC Symbol;Acc:VGNC:32142]
13	68399158	68468557	DHX35	ENSBTAG00000004039	DEAH-box helicase 35 [Source:VGNC Symbol;Acc:VGNC:28053]
13	338154	339068	ENSBTAG00000024891	ENSBTAG00000024891
13	61501526	61501651	ENSBTAG00000048009	ENSBTAG00000048009
13	66811069	66811199	ENSBTAG00000042176	ENSBTAG00000042176
14	38500940	38543991	TERF1	ENSBTAG00000032982	telomeric repeat binding factor 1 [Source:VGNC Symbol;Acc:VGNC:35749]
14	38554723	38585200	SBSPON	ENSBTAG00000017249	somatomedin B and thrombospondin type 1 domain containing [Source:VGNC Symbol;Acc:VGNC:34311]
14	38614593	38615161	ENSBTAG00000037470	ENSBTAG00000037470
16	58006950	58156083	TNR	ENSBTAG00000011706	tenascin R [Source:VGNC Symbol;Acc:VGNC:36202]
18	39808727	39838373	CALB2	ENSBTAG00000001075	calbindin 2 [Source:VGNC Symbol;Acc:VGNC:26701]
18	39992340	40315416	HYDIN	ENSBTAG00000010878	HYDIN, axonemal central pair apparatus protein [Source:VGNC Symbol;Acc:VGNC:30012]
18	41116113	41214205	ZNF536	ENSBTAG00000007262	zinc finger protein 536 [Source:VGNC Symbol;Acc:VGNC:37299]
18	43263468	43323451	ANKRD27	ENSBTAG00000009305	ankyrin repeat domain 27 [Source:VGNC Symbol;Acc:VGNC:25919]
18	43336312	43342666	NUDT19	ENSBTAG00000023614	Bos taurus nudix hydrolase 19 (NUDT19), mRNA. [Source:RefSeq mRNA;Acc:NM_001191214]
18	43371586	43432256	TDRD12	ENSBTAG00000019266	tudor domain containing 12 [Source:VGNC Symbol;Acc:VGNC:35717]
18	43435073	43466267	SLC7A9	ENSBTAG00000013338	solute carrier family 7 member 9 [Source:VGNC Symbol;Acc:VGNC:34934]
18	43486298	43568397	CEP89	ENSBTAG00000004864	centrosomal protein 89 [Source:VGNC Symbol;Acc:VGNC:27218]
18	43568646	43572422	FAAP24	ENSBTAG00000010403	Fanconi anemia core complex associated protein 24 [Source:VGNC Symbol;Acc:VGNC:28694]
18	43574291	43644737	RHPN2	ENSBTAG00000003089	rhophilin-2 [Source:RefSeq peptide;Acc:NP_001076939]
18	43658673	43714393	GPATCH1	ENSBTAG00000000721	G-patch domain containing 1 [Source:VGNC Symbol;Acc:VGNC:29514]
18	44005707	44012657	CEBPG	ENSBTAG00000017560	CCAAT/enhancer binding protein gamma [Source:VGNC Symbol;Acc:VGNC:27163]
18	44018758	44137173	PEPD	ENSBTAG00000031941	peptidase D [Source:VGNC Symbol;Acc:VGNC:32747]
18	45932691	45957028	GRAMD1A	ENSBTAG00000003820	Bos taurus GRAM domain containing 1A (GRAMD1A), mRNA. [Source:RefSeq mRNA;Acc:NM_001305021]
18	45960622	45970522	SCN1B	ENSBTAG00000003826	sodium voltage-gated channel beta subunit 1 [Source:VGNC Symbol;Acc:VGNC:34346]
18	45971859	45991833	HPN	ENSBTAG00000003829	hepsin [Source:VGNC Symbol;Acc:VGNC:29942]
18	46033469	46039340	FXYD3	ENSBTAG00000040005
18	46040472	46049240	LGI4	ENSBTAG00000017814	leucine rich repeat LGI family member 4 [Source:VGNC Symbol;Acc:VGNC:30859]
18	46053083	46057378	FXYD1	ENSBTAG00000017816	FXYD domain containing ion transport regulator 1 [Source:VGNC Symbol;Acc:VGNC:29156]
18	46057592	46066618	FXYD7	ENSBTAG00000018326	FXYD domain containing ion transport regulator 7 [Source:VGNC Symbol;Acc:VGNC:29159]
18	46067593	46078935	FXYD5	ENSBTAG00000031441	FXYD domain containing ion transport regulator 5 [Source:VGNC Symbol;Acc:VGNC:29158]
18	46398986	46407765	ATP4A	ENSBTAG00000008777	potassium-transporting ATPase alpha chain 1 [Source:RefSeq peptide;Acc:NP_001137561]
18	46407882	46410960	ENSBTAG00000045598	ENSBTAG00000045598
18	46468398	46469045	ENSBTAG00000045997	ENSBTAG00000045997
18	46528185	46538476	HAUS5	ENSBTAG00000013436	HAUS augmin like complex subunit 5 [Source:VGNC Symbol;Acc:VGNC:29760]
18	46544686	46552113	RBM42	ENSBTAG00000013440	RNA binding motif protein 42 [Source:VGNC Symbol;Acc:VGNC:33801]
18	46555943	46558285	ETV2	ENSBTAG00000013444	ETS variant 2 [Source:VGNC Symbol;Acc:VGNC:28629]
18	46584258	46592353	UPK1A	ENSBTAG00000020543	uroplakin 1A [Source:VGNC Symbol;Acc:VGNC:36684]
18	52202332	52215619	PLAUR	ENSBTAG00000013125	plasminogen activator, urokinase receptor [Source:VGNC Symbol;Acc:VGNC:32976]
18	52247311	52248128	ENSBTAG00000023439	ENSBTAG00000023439
18	52261042	52264944	IRGC	ENSBTAG00000013766	immunity related GTPase cinema [Source:VGNC Symbol;Acc:VGNC:30281]
18	52265371	52271123	ENSBTAG00000030922	ENSBTAG00000030922
18	52272972	52293313	SMG9	ENSBTAG00000011815	SMG9, nonsense mediated mRNA decay factor [Source:VGNC Symbol;Acc:VGNC:35013]
18	52303109	52316896	KCNN4	ENSBTAG00000004588	potassium calcium-activated channel subfamily N member 4 [Source:VGNC Symbol;Acc:VGNC:30486]
18	52331344	52334826	LYPD5	ENSBTAG00000037888	LY6/PLAUR domain containing 5 [Source:HGNC Symbol;Acc:HGNC:26397]
18	52849304	52867674	CEACAM19	ENSBTAG00000015313	carcinoembryonic antigen-related cell adhesion molecule 19 precursor [Source:RefSeq peptide;Acc:NP_001073730]
18	52882809	52889162	CEACAM16	ENSBTAG00000037983	carcinoembryonic antigen related cell adhesion molecule 16 [Source:VGNC Symbol;Acc:VGNC:27161]
18	52922334	52931384	BCL3	ENSBTAG00000009493	B cell CLL/lymphoma 3 [Source:HGNC Symbol;Acc:HGNC:998]
18	52943365	52959011	CBLC	ENSBTAG00000009494	Cbl proto-oncogene C [Source:VGNC Symbol;Acc:VGNC:26810]
18	53449226	53451814	CD3EAP	ENSBTAG00000023601	CD3e molecule associated protein [Source:VGNC Symbol;Acc:VGNC:27030]
18	53451652	53466227	ERCC1	ENSBTAG00000017355	ERCC excision repair 1, endonuclease non-catalytic subunit [Source:VGNC Symbol;Acc:VGNC:28568]
18	53501995	53508395	FOSB	ENSBTAG00000008182	FosB proto-oncogene, AP-1 transcription factor subunit [Source:VGNC Symbol;Acc:VGNC:29074]
18	53514400	53522925	RTN2	ENSBTAG00000008185	reticulon 2 [Source:VGNC Symbol;Acc:VGNC:34204]
18	53523392	53528749	PPM1N	ENSBTAG00000014187	protein phosphatase, Mg2+/Mn2+ dependent 1N (putative) [Source:HGNC Symbol;Acc:HGNC:26845]
18	53531933	53544919	VASP	ENSBTAG00000019604	vasodilator stimulated phosphoprotein [Source:VGNC Symbol;Acc:VGNC:36769]
18	53545325	53612052	OPA3	ENSBTAG00000019605	OPA3, outer mitochondrial membrane lipid metabolism regulator [Source:VGNC Symbol;Acc:VGNC:32433]
18	53700346	53725742	MYPOP	ENSBTAG00000045708	Myb related transcription factor, partner of profilin [Source:HGNC Symbol;Acc:HGNC:20178]
18	53755489	53759029	SIX5	ENSBTAG00000013346	SIX homeobox 5 [Source:VGNC Symbol;Acc:VGNC:34641]
18	53760689	53769611	DMPK	ENSBTAG00000013347	DM1 protein kinase [Source:VGNC Symbol;Acc:VGNC:28109]
18	53770876	53777767	DMWD	ENSBTAG00000021417	DM1 locus, WD repeat containing [Source:HGNC Symbol;Acc:HGNC:2936]
18	53779851	53800006	RSPH6A	ENSBTAG00000012097	radial spoke head 6 homolog A [Source:VGNC Symbol;Acc:VGNC:34186]
18	53800327	53829555	SYMPK	ENSBTAG00000012101	symplekin [Source:VGNC Symbol;Acc:VGNC:35514]
18	53834507	53841046	FOXA3	ENSBTAG00000012104	forkhead box A3 [Source:VGNC Symbol;Acc:VGNC:29079]
18	53874463	53889874	NOVA2	ENSBTAG00000013157	NOVA alternative splicing regulator 2 [Source:VGNC Symbol;Acc:VGNC:32181]
18	58425828	58448787	PPP2R1A	ENSBTAG00000019851	protein phosphatase 2 scaffold subunit Aalpha [Source:VGNC Symbol;Acc:VGNC:33253]
18	58485273	58486123	ENSBTAG00000046864	ENSBTAG00000046864
18	39902861	39905155	CMTR2	ENSBTAG00000047367	cap methyltransferase 2 [Source:VGNC Symbol;Acc:VGNC:27490]
18	43324646	43325359	RGS9BP	ENSBTAG00000039441	regulator of G protein signaling 9 binding protein [Source:VGNC Symbol;Acc:VGNC:33927]
18	46516557	46516985	ENSBTAG00000047277	ENSBTAG00000047277
18	53852957	53853373	NANOS2	ENSBTAG00000047505	nanos C2HC-type zinc finger 2 [Source:VGNC Symbol;Acc:VGNC:31876]
18	58494237	58495142	ENSBTAG00000018162	ENSBTAG00000018162
18	58529773	58530702	ENSBTAG00000046472	ENSBTAG00000046472
18	20502890	20502995	ENSBTAG00000039104	ENSBTAG00000039104
18	41163930	41164024	ENSBTAG00000046065	ENSBTAG00000046065
18	26859233	26859315	ENSBTAG00000047938	ENSBTAG00000047938
18	58436585	58436710	ENSBTAG00000029317	ENSBTAG00000029317
18	43698039	43698153	ENSBTAG00000028430	ENSBTAG00000028430
19	26638785	26668466	NLRP1	ENSBTAG00000020433	NLR family pyrin domain containing 1 [Source:VGNC Symbol;Acc:VGNC:32115]
19	26675245	26676864	ENSBTAG00000025126	ENSBTAG00000025126
19	26678020	26682795	MIS12	ENSBTAG00000020432	MIS12, kinetochore complex component [Source:VGNC Symbol;Acc:VGNC:31484]
19	26683195	26691719	DERL2	ENSBTAG00000020431	derlin 2 [Source:VGNC Symbol;Acc:VGNC:28011]
19	26702292	26719037	DHX33	ENSBTAG00000032083	putative ATP-dependent RNA helicase DHX33 [Source:RefSeq peptide;Acc:NP_001029735]
19	26724673	26730100	C1QBP	ENSBTAG00000012739	complement C1q binding protein [Source:VGNC Symbol;Acc:VGNC:26618]
19	26730162	26737179	RPAIN	ENSBTAG00000025149	RPA interacting protein [Source:VGNC Symbol;Acc:VGNC:34097]
19	26738050	26759710	NUP88	ENSBTAG00000011507	nucleoporin 88 [Source:VGNC Symbol;Acc:VGNC:32365]
19	26759902	26870523	RABEP1	ENSBTAG00000011505	rabaptin, RAB GTPase binding effector protein 1 [Source:VGNC Symbol;Acc:VGNC:33667]
19	27281925	27303514	PELP1	ENSBTAG00000018315	proline, glutamate and leucine rich protein 1 [Source:VGNC Symbol;Acc:VGNC:32744]
19	27331075	27339653	ALOX15	ENSBTAG00000011990	arachidonate 15-lipoxygenase [Source:VGNC Symbol;Acc:VGNC:25843]
19	27361427	27370256	ALOX12E	ENSBTAG00000031933
19	27388083	27388880	ENSBTAG00000047925	ENSBTAG00000047925
19	27421125	27434258	ALOX12	ENSBTAG00000021933	arachidonate 12-lipoxygenase, 12S type [Source:VGNC Symbol;Acc:VGNC:25841]
19	27436503	27438226	RNASEK	ENSBTAG00000021932	ribonuclease K [Source:VGNC Symbol;Acc:VGNC:34002]
19	27438490	27441264	C19H17orf49	ENSBTAG00000021931	Chromatin complexes subunit BAP18 [Source:UniProtKB/Swiss-Prot;Acc:Q32LD1]
19	27447122	27451108	BCL6B	ENSBTAG00000020854	B cell CLL/lymphoma 6B [Source:HGNC Symbol;Acc:HGNC:1002]
19	28408302	28410747	VAMP2	ENSBTAG00000003891	vesicle-associated membrane protein 2 [Source:RefSeq peptide;Acc:NP_776908]
19	28422865	28423634	ENSBTAG00000000386	ENSBTAG00000000386
19	28432877	28435112	TMEM107	ENSBTAG00000001702	transmembrane protein 107 [Source:VGNC Symbol;Acc:VGNC:35947]
19	28447634	28452478	AURKB	ENSBTAG00000001717	aurora kinase B [Source:VGNC Symbol;Acc:VGNC:26351]
19	28466248	28483634	CTC1	ENSBTAG00000007117	CST telomere replication complex component 1 [Source:VGNC Symbol;Acc:VGNC:27787]
19	28498629	28511705	PFAS	ENSBTAG00000031509	phosphoribosylformylglycinamidine synthase [Source:VGNC Symbol;Acc:VGNC:32765]
19	28519719	28521133	RANGRF	ENSBTAG00000018809	RAN guanine nucleotide release factor [Source:VGNC Symbol;Acc:VGNC:33714]
19	28521109	28525043	SLC25A35	ENSBTAG00000018808	solute carrier family 25 member 35 [Source:VGNC Symbol;Acc:VGNC:34761]
19	28541733	28550116	ARHGEF15	ENSBTAG00000020688	Rho guanine nucleotide exchange factor 15 [Source:VGNC Symbol;Acc:VGNC:26107]
19	28565347	28570385	ODF4	ENSBTAG00000014443	outer dense fiber protein 4 [Source:RefSeq peptide;Acc:NP_001069230]
19	28590314	28595213	RPL26	ENSBTAG00000012344	60S ribosomal protein L26 [Source:UniProtKB/Swiss-Prot;Acc:P61257]
19	28637771	28672316	NDEL1	ENSBTAG00000011994	nudE neurodevelopment protein 1 like 1 [Source:VGNC Symbol;Acc:VGNC:31933]
19	28680825	28800880	MYH10	ENSBTAG00000021151	myosin heavy chain 10 [Source:VGNC Symbol;Acc:VGNC:31794]
19	28873595	28886401	CCDC42	ENSBTAG00000018416	coiled-coil domain containing 42 [Source:VGNC Symbol;Acc:VGNC:26896]
19	28908996	28911151	MFSD6L	ENSBTAG00000039012	major facilitator superfamily domain-containing protein 6-like [Source:RefSeq peptide;Acc:NP_001095993]
19	28913867	28961787	PIK3R6	ENSBTAG00000016344	phosphoinositide-3-kinase regulatory subunit 6 [Source:VGNC Symbol;Acc:VGNC:32897]
19	33585303	33594740	TVP23B	ENSBTAG00000004496	Golgi apparatus membrane protein TVP23 homolog B [Source:UniProtKB/Swiss-Prot;Acc:Q29S14]
19	33601282	33650183	ENSBTAG00000002605	ENSBTAG00000002605
19	33673396	33688126	ZNF286A	ENSBTAG00000000943	zinc finger protein 286A [Source:RefSeq peptide;Acc:NP_001103913]
19	33697531	33739141	ENSBTAG00000031071	ENSBTAG00000031071
19	33778487	33811728	LRRC75A	ENSBTAG00000025078	leucine rich repeat containing 75A [Source:VGNC Symbol;Acc:VGNC:31028]
19	33816540	33834542	TRPV2	ENSBTAG00000003014	transient receptor potential cation channel subfamily V member 2 [Source:VGNC Symbol;Acc:VGNC:36398]
19	33853788	33855685	UBB	ENSBTAG00000017246	Polyubiquitin-B Ubiquitin [Source:UniProtKB/Swiss-Prot;Acc:P0CG53]
19	33878366	33886577	ENSBTAG00000013274	ENSBTAG00000013274
19	33888404	33930428	PIGL	ENSBTAG00000013273	phosphatidylinositol glycan anchor biosynthesis class L [Source:VGNC Symbol;Acc:VGNC:32871]
19	34343306	34386583	AKAP10	ENSBTAG00000003439	A-kinase anchoring protein 10 [Source:VGNC Symbol;Acc:VGNC:25780]
19	34503724	34521108	SLC47A2	ENSBTAG00000038548	solute carrier family 47 member 2 [Source:VGNC Symbol;Acc:VGNC:34888]
19	34522835	34538828	ALDH3A2	ENSBTAG00000039161	aldehyde dehydrogenase 3 family member A2 [Source:VGNC Symbol;Acc:VGNC:25814]
19	34589774	34619450	SLC47A1	ENSBTAG00000016544	solute carrier family 47 member 1 [Source:VGNC Symbol;Acc:VGNC:34887]
19	34721003	34771507	EPN2	ENSBTAG00000017771	epsin 2 [Source:VGNC Symbol;Acc:VGNC:28547]
19	34796322	34817309	GRAP	ENSBTAG00000003707	GRB2-related adapter protein [Source:UniProtKB/Swiss-Prot;Acc:A6QLK6]
19	34817325	34872403	SLC5A10	ENSBTAG00000003700	solute carrier family 5 member 10 [Source:VGNC Symbol;Acc:VGNC:34903]
19	34832961	34860869	FAM83G	ENSBTAG00000003705	family with sequence similarity 83 member G [Source:VGNC Symbol;Acc:VGNC:28838]
19	34878438	34899068	PRPSAP2	ENSBTAG00000014858	phosphoribosyl pyrophosphate synthetase associated protein 2 [Source:VGNC Symbol;Acc:VGNC:33387]
19	45074947	45103998	ENSBTAG00000005696	ENSBTAG00000005696
19	45113921	45131794	ADAM11	ENSBTAG00000001735	ADAM metallopeptidase domain 11 [Source:HGNC Symbol;Acc:HGNC:189]
19	45154679	45186611	GJC1	ENSBTAG00000004036	gap junction protein gamma 1 [Source:VGNC Symbol;Acc:VGNC:29382]
19	45194104	45196727	HIGD1B	ENSBTAG00000016736	HIG1 hypoxia inducible domain family member 1B [Source:VGNC Symbol;Acc:VGNC:29851]
19	45197098	45233617	EFTUD2	ENSBTAG00000013526	elongation factor Tu GTP binding domain containing 2 [Source:VGNC Symbol;Acc:VGNC:28364]
19	45233934	45237988	ENSBTAG00000013529	ENSBTAG00000013529
19	45241325	45250609	GFAP	ENSBTAG00000013534	glial fibrillary acidic protein [Source:VGNC Symbol;Acc:VGNC:29323]
19	45239328	45240593	ENSBTAG00000013532	ENSBTAG00000013532	Ig-like V-type domain-containing protein FAM187A [Source:UniProtKB/Swiss-Prot;Acc:A7E3C4]
19	28443498	28445326	BORCS6	ENSBTAG00000001711	BLOC-1-related complex subunit 6 [Source:RefSeq peptide;Acc:NP_001035655]
19	28602302	28602961	RNF222	ENSBTAG00000039299	ring finger protein 222 [Source:VGNC Symbol;Acc:VGNC:34056]
19	33814771	33814837	ENSBTAG00000042447	ENSBTAG00000042447	small nucleolar RNA, C/D box 49B [Source:HGNC Symbol;Acc:HGNC:32721]
19	34255698	34255794	ENSBTAG00000045261	ENSBTAG00000045261
19	26741713	26741788	bta-mir-199c	ENSBTAG00000044450	bta-mir-199c [Source:miRBase;Acc:MI0011364]
19	27441652	27441763	bta-mir-497	ENSBTAG00000029868	bta-mir-497 [Source:miRBase;Acc:MI0005467]
19	45204924	45204997	bta-mir-2343	ENSBTAG00000044884	bta-mir-2343 [Source:miRBase;Acc:MI0011371]
19	28862248	28862351	ENSBTAG00000043290	ENSBTAG00000043290
19	33577136	33577456	ENSBTAG00000042416	ENSBTAG00000042416
19	33814289	33814358	ENSBTAG00000042098	ENSBTAG00000042098	small nucleolar RNA, C/D box 49A [Source:HGNC Symbol;Acc:HGNC:10189]
19	28432321	28432456	ENSBTAG00000043508	ENSBTAG00000043508	small nucleolar RNA, C/D box 118 [Source:HGNC Symbol;Acc:HGNC:32952]
19	27441343	27441429	bta-mir-195	ENSBTAG00000030113	bta-mir-195 [Source:miRBase;Acc:MI0005459]
19	33813459	33813532	ENSBTAG00000043442	ENSBTAG00000043442	small nucleolar RNA, C/D box 65 [Source:HGNC Symbol;Acc:HGNC:32726]
20	1452376	1893741	DOCK2	ENSBTAG00000014612	dedicator of cytokinesis 2 [Source:VGNC Symbol;Acc:VGNC:28157]
20	1903854	1907281	FOXI1	ENSBTAG00000014620	forkhead box I1 [Source:VGNC Symbol;Acc:VGNC:29087]
20	1935206	1940216	ENSBTAG00000046449	ENSBTAG00000046449
20	24955390	25026808	ARL15	ENSBTAG00000019834	ADP ribosylation factor like GTPase 15 [Source:HGNC Symbol;Acc:HGNC:25945]
20	24442440	24442887	ENSBTAG00000004920	ENSBTAG00000004920
20	24659525	24660204	HSPB3	ENSBTAG00000022714	Heat shock protein beta-3 [Source:UniProtKB/Swiss-Prot;Acc:Q2KHU9]
20	24356250	24356373	ENSBTAG00000042490	ENSBTAG00000042490
20	1923843	1923948	ENSBTAG00000043132	ENSBTAG00000043132
20	28572649	28572720	ENSBTAG00000044320	ENSBTAG00000044320
21	16720161	16909145	AKAP13	ENSBTAG00000037383	A-kinase anchoring protein 13 [Source:HGNC Symbol;Acc:HGNC:371]
21	69809416	69812653	CKB	ENSBTAG00000035998	creatine kinase B [Source:VGNC Symbol;Acc:VGNC:27384]
21	69817755	69824185	TRMT61A	ENSBTAG00000031327	tRNA methyltransferase 61A [Source:VGNC Symbol;Acc:VGNC:36375]
21	69843888	69846777	BAG5	ENSBTAG00000017361	BCL2 associated athanogene 5 [Source:VGNC Symbol;Acc:VGNC:26409]
21	69847359	69873999	APOPT1	ENSBTAG00000021199	apoptogenic 1, mitochondrial [Source:VGNC Symbol;Acc:VGNC:26037]
21	69896140	69957173	KLC1	ENSBTAG00000017299
22	2112410	2117440	EOMES	ENSBTAG00000016920	eomesodermin [Source:VGNC Symbol;Acc:VGNC:28516]
22	55497704	55621186	SLC6A11	ENSBTAG00000038962	solute carrier family 6 member 11 [Source:VGNC Symbol;Acc:VGNC:34914]
22	55540216	55540346	ENSBTAG00000045463	ENSBTAG00000045463
24	37251675	37277015	METTL4	ENSBTAG00000021668	methyltransferase like 4 [Source:VGNC Symbol;Acc:VGNC:31413]
24	37281832	37313654	NDC80	ENSBTAG00000021673	NDC80, kinetochore complex component [Source:VGNC Symbol;Acc:VGNC:31931]
24	37348582	37467285	SMCHD1	ENSBTAG00000003354	structural maintenance of chromosomes flexible hinge domain containing 1 [Source:VGNC Symbol;Acc:VGNC:35004]
24	39312037	39404644	EPB41L3	ENSBTAG00000019251	erythrocyte membrane protein band 4.1 like 3 [Source:VGNC Symbol;Acc:VGNC:28522]
24	39737549	39739323	TMEM200C	ENSBTAG00000046396	transmembrane protein 200C [Source:RefSeq peptide;Acc:NP_001193588]
24	39250142	39251488	ZBTB14	ENSBTAG00000038970	zinc finger and BTB domain containing 14 [Source:VGNC Symbol;Acc:VGNC:37061]
24	37318414	37318537	ENSBTAG00000044303	ENSBTAG00000044303
25	20685205	20800341	HS3ST2	ENSBTAG00000017391	heparan sulfate-glucosamine 3-sulfotransferase 2 [Source:VGNC Symbol;Acc:VGNC:29959]
26	24232143	24274045	PDCD11	ENSBTAG00000009715	programmed cell death 11 [Source:VGNC Symbol;Acc:VGNC:32659]
26	24275663	24281013	CALHM2	ENSBTAG00000009719	calcium homeostasis modulator family member 2 [Source:VGNC Symbol;Acc:VGNC:26708]
26	24284483	24287960	CALHM1	ENSBTAG00000007044	calcium homeostasis modulator 1 [Source:VGNC Symbol;Acc:VGNC:26707]
26	24303869	24309613	CALHM3	ENSBTAG00000032761	calcium homeostasis modulator 3 [Source:VGNC Symbol;Acc:VGNC:26709]
26	24330861	24403159	NEURL1	ENSBTAG00000003741	neuralized E3 ubiquitin protein ligase 1 [Source:VGNC Symbol;Acc:VGNC:32013]
27	1019178	1424171	CSMD1	ENSBTAG00000009739	CUB and Sushi multiple domains 1 [Source:HGNC Symbol;Acc:HGNC:14026]
27	6625352	6673110	WDR17	ENSBTAG00000014135	WD repeat domain 17 [Source:VGNC Symbol;Acc:VGNC:36884]
27	6674973	6683937	SPATA4	ENSBTAG00000014141	spermatogenesis associated 4 [Source:VGNC Symbol;Acc:VGNC:35184]
27	6692314	6736965	ASB5	ENSBTAG00000014143	ankyrin repeat and SOCS box containing 5 [Source:VGNC Symbol;Acc:VGNC:26198]
27	32746961	32756493	PLPBP	ENSBTAG00000011075	pyridoxal phosphate binding protein [Source:VGNC Symbol;Acc:VGNC:33043]
27	32774355	32797592	ADGRA2	ENSBTAG00000008814	adhesion G protein-coupled receptor A2 [Source:HGNC Symbol;Acc:HGNC:17849]
27	32799190	32803514	BRF2	ENSBTAG00000027665	BRF2, RNA polymerase III transcription initiation factor subunit [Source:VGNC Symbol;Acc:VGNC:26563]
27	32823609	32863935	RAB11FIP1	ENSBTAG00000011684	RAB11 family interacting protein 1 [Source:VGNC Symbol;Acc:VGNC:33616]
27	32885370	32890975	GOT1L1	ENSBTAG00000016446	glutamic-oxaloacetic transaminase 1 like 1 [Source:VGNC Symbol;Acc:VGNC:29502]
27	3522783	3523156	ENSBTAG00000035021	ENSBTAG00000035021
27	1330181	1330256	ENSBTAG00000046371	ENSBTAG00000046371

## Sheet: S9
Supplemenatry Table S9 | List of candidate selection signatures regions and related genes in N'Dama based on Rsb test
chr	Gene start (bp)	Gene end (bp)	Gene name	Gene stable ID	Gene description
1	53768326	53884123	DZIP3	ENSBTAG00000006158	DAZ interacting zinc finger protein 3 [Source:VGNC Symbol;Acc:VGNC:28285]
1	53995476	54043198	TRAT1	ENSBTAG00000000183	T cell receptor associated transmembrane adaptor 1 [Source:VGNC Symbol;Acc:VGNC:36295]
1	70573620	70664027	OSBPL11	ENSBTAG00000006471	oxysterol binding protein like 11 [Source:VGNC Symbol;Acc:VGNC:32459]
1	70697540	70698145		ENSBTAG00000003383
1	53913505	53913597		ENSBTAG00000047012
4	29124581	29216280	ITGB8	ENSBTAG00000003709	integrin subunit beta 8 [Source:VGNC Symbol;Acc:VGNC:30333]
4	81667665	81807550	CDK13	ENSBTAG00000001528	cyclin dependent kinase 13 [Source:VGNC Symbol;Acc:VGNC:27118]
5	25255494	25286217	METAP2	ENSBTAG00000019944	methionyl aminopeptidase 2 [Source:VGNC Symbol;Acc:VGNC:31397]
5	25289516	25300934	USP44	ENSBTAG00000019946	ubiquitin specific peptidase 44 [Source:VGNC Symbol;Acc:VGNC:36731]
5	26753574	26759487	AMHR2	ENSBTAG00000018524	anti-Muellerian hormone type-2 receptor precursor [Source:RefSeq peptide;Acc:NP_001192257]
5	26769555	26804655	SP1	ENSBTAG00000003021	Sp1 transcription factor [Source:VGNC Symbol;Acc:VGNC:35152]
5	26848177	26855849	SP7	ENSBTAG00000033292	Sp7 transcription factor [Source:VGNC Symbol;Acc:VGNC:35157]
5	43746464	43872342	MYRFL	ENSBTAG00000014829	myelin regulatory factor-like [Source:VGNC Symbol;Acc:VGNC:31845]
5	43887153	43944943	RAB3IP	ENSBTAG00000031950	RAB3A interacting protein [Source:HGNC Symbol;Acc:HGNC:16508]
5	105799704	105837839	GALNT8	ENSBTAG00000017378	polypeptide N-acetylgalactosaminyltransferase 8 [Source:HGNC Symbol;Acc:HGNC:4130]
5	105762455	105764041	KCNA6	ENSBTAG00000047191	potassium voltage-gated channel subfamily A member 6 [Source:HGNC Symbol;Acc:HGNC:6225]
6	10923400	10924214		ENSBTAG00000009280
6	27328572	27329745		ENSBTAG00000024578
6	27333479	27512867	TSPAN5	ENSBTAG00000012343	tetraspanin 5 [Source:VGNC Symbol;Acc:VGNC:36440]
6	43436544	43531420	ADGRA3	ENSBTAG00000004653	adhesion G protein-coupled receptor A3 [Source:VGNC Symbol;Acc:VGNC:25657]
6	81511554	81653990	TECRL	ENSBTAG00000024826	trans-2,3-enoyl-CoA reductase like [Source:VGNC Symbol;Acc:VGNC:35731]
6	85839655	85877748	YTHDC1	ENSBTAG00000015572	YTH domain containing 1 [Source:VGNC Symbol;Acc:VGNC:37039]
6	27336719	27336829	RF00026	ENSBTAG00000042156
8	48223036	48303993	TMEM2	ENSBTAG00000005090	transmembrane protein 2 [Source:VGNC Symbol;Acc:VGNC:36021]
8	48407617	48455649	ABHD17B	ENSBTAG00000006816	abhydrolase domain containing 17B [Source:VGNC Symbol;Acc:VGNC:25498]
8	48456364	48516656	C8H9orf85	ENSBTAG00000006831
8	48658281	48782109	GDA	ENSBTAG00000011545	guanine deaminase [Source:VGNC Symbol;Acc:VGNC:29294]
8	49200919	49307438	TMC1	ENSBTAG00000018778	transmembrane channel like 1 [Source:VGNC Symbol;Acc:VGNC:35917]
8	83023629	83270596	FANCC	ENSBTAG00000017195	Fanconi anemia complementation group C [Source:VGNC Symbol;Acc:VGNC:28854]
8	83243782	83253558	TSPY	ENSBTAG00000031517	testis-specific Y-encoded protein 1 [Source:RefSeq peptide;Acc:NP_001231537]
8	112796601	112836172	DCDC2C	ENSBTAG00000038489	doublecortin domain containing 2C [Source:VGNC Symbol;Acc:VGNC:27912]
8	112837179	112860706	ALLC	ENSBTAG00000013838	allantoicase [Source:VGNC Symbol;Acc:VGNC:25840]
8	112869671	112892968	COLEC11	ENSBTAG00000016225	collectin subfamily member 11 [Source:VGNC Symbol;Acc:VGNC:27578]
8	112896493	112901718	RPS7	ENSBTAG00000016224	ribosomal protein S7 [Source:VGNC Symbol;Acc:VGNC:34150]
8	112911793	112920759	RNASEH1	ENSBTAG00000016235	ribonuclease H1 isoform 2 [Source:RefSeq peptide;Acc:NP_001039970]
8	112948194	112954511	ADI1	ENSBTAG00000005403	acireductone dioxygenase 1 [Source:VGNC Symbol;Acc:VGNC:25675]
8	106605281	106605387	RF00026	ENSBTAG00000043387
8	48360400	48360475		ENSBTAG00000045321
8	48526948	48527063	RF00302	ENSBTAG00000043105
9	19327496	19368400	LCA5	ENSBTAG00000043950	LCA5, lebercilin [Source:VGNC Symbol;Acc:VGNC:30807]
9	22263095	22343685	IBTK	ENSBTAG00000026716	inhibitor of Bruton tyrosine kinase [Source:VGNC Symbol;Acc:VGNC:30022]
9	22318432	22318514		ENSBTAG00000044795
9	22326483	22326550	RF01169	ENSBTAG00000044293
10	15470659	15537499	CORO2B	ENSBTAG00000012681	coronin 2B [Source:VGNC Symbol;Acc:VGNC:27624]
10	34162005	34194793	FAM98B	ENSBTAG00000021870	family with sequence similarity 98 member B [Source:VGNC Symbol;Acc:VGNC:28849]
10	34202006	34280992	RASGRP1	ENSBTAG00000021872	RAS guanyl releasing protein 1 [Source:VGNC Symbol;Acc:VGNC:33747]
10	103185307	103381020	TTC7B	ENSBTAG00000006392	tetratricopeptide repeat domain 7B [Source:VGNC Symbol;Acc:VGNC:36481]
10	103508678	103703817	RPS6KA5	ENSBTAG00000010906	ribosomal protein S6 kinase A5 [Source:VGNC Symbol;Acc:VGNC:34144]
10	38912008	38912352		ENSBTAG00000004692
10	34152725	34152831	RF00026	ENSBTAG00000042361
10	34736653	34736722		ENSBTAG00000045437
11	7006512	7007310		ENSBTAG00000046579
11	7020020	7045388	IL1RL2	ENSBTAG00000005704	interleukin 1 receptor like 2 [Source:VGNC Symbol;Acc:VGNC:30135]
11	7121609	7141103	IL1RL1	ENSBTAG00000018571	interleukin 1 receptor like 1 [Source:VGNC Symbol;Acc:VGNC:30134]
11	7153231	7179569	IL18R1	ENSBTAG00000001034	interleukin 18 receptor 1 [Source:VGNC Symbol;Acc:VGNC:30127]
11	7196920	7221257	IL18RAP	ENSBTAG00000033748	interleukin 18 receptor accessory protein [Source:VGNC Symbol;Acc:VGNC:30128]
11	60268166	60268762		ENSBTAG00000039218
12	11705780	12059605	VWA8	ENSBTAG00000001133	von Willebrand factor A domain containing 8 [Source:VGNC Symbol;Acc:VGNC:36856]
12	12293695	12405237	DGKH	ENSBTAG00000013879	diacylglycerol kinase eta [Source:VGNC Symbol;Acc:VGNC:28029]
12	20704476	20778873	FAM124A	ENSBTAG00000046408	family with sequence similarity 124 member A [Source:VGNC Symbol;Acc:VGNC:28723]
12	20856479	20887977	SERPINE3	ENSBTAG00000005284	serpin family E member 3 [Source:VGNC Symbol;Acc:VGNC:34477]
12	20888781	20973823	INTS6	ENSBTAG00000002970	integrator complex subunit 6 [Source:VGNC Symbol;Acc:VGNC:30232]
12	34478041	34535642		ENSBTAG00000019545
12	44295888	44616940	KLHL1	ENSBTAG00000008647	kelch-like protein 1 [Source:RefSeq peptide;Acc:NP_001179984]
12	48831952	49108263	KLF12	ENSBTAG00000044007	Kruppel like factor 12 [Source:VGNC Symbol;Acc:VGNC:30628]
12	44822977	44823477		ENSBTAG00000046942
12	61064673	61067201	SLITRK6	ENSBTAG00000004388	SLIT and NTRK like family member 6 [Source:VGNC Symbol;Acc:VGNC:34967]
12	44865039	44865164	RF00619	ENSBTAG00000042849
13	60684667	60691970	RSPO4	ENSBTAG00000021885	R-spondin 4 [Source:VGNC Symbol;Acc:VGNC:34190]
13	60729756	60773778	ANGPT4	ENSBTAG00000021811	angiopoietin 4 [Source:VGNC Symbol;Acc:VGNC:25889]
14	727106	742068		ENSBTAG00000034176
14	32050488	32143515	DNAJC5B	ENSBTAG00000015229	DnaJ homolog subfamily C member 5B [Source:UniProtKB/Swiss-Prot;Acc:Q2KIJ8]
14	32164442	32210852	TRIM55	ENSBTAG00000021009	tripartite motif containing 55 [Source:VGNC Symbol;Acc:VGNC:36341]
14	84253919	84504093	SNTB1	ENSBTAG00000044126	syntrophin beta 1 [Source:HGNC Symbol;Acc:HGNC:11168]
14	716784	716890	RF00026	ENSBTAG00000042158
16	19500371	19567831	KCTD3	ENSBTAG00000006186	BTB/POZ domain-containing protein KCTD3 [Source:RefSeq peptide;Acc:NP_001178353]
16	46468328	46566127	CAMTA1	ENSBTAG00000014602	calmodulin binding transcription activator 1 [Source:VGNC Symbol;Acc:VGNC:26732]
17	25033671	25037093		ENSBTAG00000035012
17	25054142	25057633		ENSBTAG00000040370
17	25066971	25068298		ENSBTAG00000036321
17	35618100	35622852	IL2	ENSBTAG00000020883	interleukin 2 [Source:VGNC Symbol;Acc:VGNC:30137]
17	36034532	36037275		ENSBTAG00000035606
17	36072731	36120715	ADAD1	ENSBTAG00000046191	adenosine deaminase domain containing 1 [Source:VGNC Symbol;Acc:VGNC:25601]
17	50734879	50736971		ENSBTAG00000046439
17	51532092	51533990		ENSBTAG00000039769
17	51645903	51648371		ENSBTAG00000034761
17	51813720	51818775		ENSBTAG00000046986
17	65417479	65434194	HNF1A	ENSBTAG00000021795	HNF1 homeobox A [Source:VGNC Symbol;Acc:VGNC:29889]
17	65435169	65445334	C17H12orf43	ENSBTAG00000021796	uncharacterized protein C12orf43 homolog [Source:RefSeq peptide;Acc:NP_001026923]
17	65446987	65463409	OASL	ENSBTAG00000003297	2'-5'-oligoadenylate synthetase like [Source:VGNC Symbol;Acc:VGNC:32392]
17	65508336	65514043		ENSBTAG00000032047
17	65519357	65552128	ANKRD13A	ENSBTAG00000014376	ankyrin repeat domain 13A [Source:VGNC Symbol;Acc:VGNC:25912]
17	50927147	50927590		ENSBTAG00000046657
17	65456341	65456721		ENSBTAG00000046887
17	39082853	39082971	RF00001	ENSBTAG00000048198
17	36079229	36079342	RF00026	ENSBTAG00000046515
19	3876962	3879198	KIF2B	ENSBTAG00000017345	kinesin family member 2B [Source:VGNC Symbol;Acc:VGNC:30600]
19	3899300	3899416	RF00322	ENSBTAG00000044618
20	37092892	37174619		ENSBTAG00000000586
20	37189901	37303893	NIPBL	ENSBTAG00000000579	NIPBL, cohesin loading factor [Source:VGNC Symbol;Acc:VGNC:32085]
21	30667805	30753716	OTUD7A	ENSBTAG00000006868	OTU deubiquitinase 7A [Source:VGNC Symbol;Acc:VGNC:32499]
21	37109671	37273808	NOVA1	ENSBTAG00000002170	NOVA alternative splicing regulator 1 [Source:HGNC Symbol;Acc:HGNC:7886]
21	44674273	44703824	NPAS3	ENSBTAG00000004462	neuronal PAS domain protein 3 [Source:HGNC Symbol;Acc:HGNC:19311]
21	50322855	50324578		ENSBTAG00000017924
21	50392543	50393631		ENSBTAG00000009980
22	1310943	1311505		ENSBTAG00000015897
22	1445067	1451951	SEC61G	ENSBTAG00000014971	Sec61 translocon gamma subunit [Source:VGNC Symbol;Acc:VGNC:49154]
23	25855146	25863045	BLA-DQB	ENSBTAG00000019588	boLa class II histocompatibility antigen, DQB*0101 beta chain precursor [Source:RefSeq peptide;Acc:NP_001029840]
24	49610404	49615823	C24H18orf32	ENSBTAG00000021334	UPF0729 protein C18orf32 homolog [Source:UniProtKB/Swiss-Prot;Acc:Q3ZC78]
24	49617411	49621972	RPL17	ENSBTAG00000022902	60S ribosomal protein L17 [Source:UniProtKB/Swiss-Prot;Acc:Q3T025]
24	49620125	49620187	RF00151	ENSBTAG00000043263
24	49621162	49621227	RF00151	ENSBTAG00000042206	small nucleolar RNA, C/D box 58B [Source:HGNC Symbol;Acc:HGNC:10209]
24	49618582	49618645	RF00151	ENSBTAG00000042368	small nucleolar RNA, C/D box 58C [Source:HGNC Symbol;Acc:HGNC:33613]
24	49620764	49620828	RF00151	ENSBTAG00000043301	small nucleolar RNA, C/D box 58A [Source:HGNC Symbol;Acc:HGNC:10208]
25	16556655	16625702	SMG1	ENSBTAG00000020735	SMG1, nonsense mediated mRNA decay associated PI3K related kinase [Source:VGNC Symbol;Acc:VGNC:35010]
25	16618107	16618216	RF00026	ENSBTAG00000044528
27	18244331	18258187	FRG1	ENSBTAG00000007089	protein FRG1 [Source:RefSeq peptide;Acc:NP_001069034]
27	28450185	28459083	RNF122	ENSBTAG00000016411	ring finger protein 122 [Source:VGNC Symbol;Acc:VGNC:34015]
27	28963365	28969954	DUSP26	ENSBTAG00000016413	dual specificity phosphatase 26 [Source:VGNC Symbol;Acc:VGNC:28258]
27	37487668	37521134	INTS10	ENSBTAG00000025003	integrator complex subunit 10 [Source:VGNC Symbol;Acc:VGNC:30224]
27	18005182	18005309	RF01241	ENSBTAG00000044896
27	18068925	18069022	RF00026	ENSBTAG00000045073
29	30128441	30218950	KIRREL3	ENSBTAG00000006804	kin of IRRE-like protein 3 precursor [Source:RefSeq peptide;Acc:NP_001071553]

## Sheet: S10
Supplemenatry Table S10 | List of candidate selection signatures regions and related genes in Holstein based on Rsb test
Chr	Gene start (bp)	Gene end (bp)	Gene name	Gene stable ID	Gene description
1	118537063	118539344	SERP1	ENSBTAG00000009104	stress associated endoplasmic reticulum protein 1 [Source:VGNC Symbol;Acc:VGNC:34464]
1	118495012	118536744	EIF2A	ENSBTAG00000009106	eukaryotic translation initiation factor 2A [Source:VGNC Symbol;Acc:VGNC:28379]
1	118445768	118476097	SELENOT	ENSBTAG00000031435	selenoprotein T [Source:VGNC Symbol;Acc:VGNC:53604]
1	118527999	118528130	RF00406	ENSBTAG00000042474
2	128078919	128103312	LDLRAP1	ENSBTAG00000001050	low density lipoprotein receptor adaptor protein 1 [Source:VGNC Symbol;Acc:VGNC:30830]
2	132522953	132529468	SH2D5	ENSBTAG00000001082	SH2 domain containing 5 [Source:VGNC Symbol;Acc:VGNC:50133]
2	125343515	125370269	GMEB1	ENSBTAG00000001160	glucocorticoid modulatory element binding protein 1 [Source:VGNC Symbol;Acc:VGNC:29432]
2	128213651	128254607		ENSBTAG00000001297	rhesus-like protein [Source:NCBI gene;Acc:282685]
2	131341266	131359925		ENSBTAG00000001700
2	131589017	131597324	LDLRAD2	ENSBTAG00000001784	low density lipoprotein receptor class A domain containing 2 [Source:VGNC Symbol;Acc:VGNC:30827]
2	131935441	132060210	ECE1	ENSBTAG00000002977	endothelin converting enzyme 1 [Source:VGNC Symbol;Acc:VGNC:28302]
2	128137418	128203726	MACO1	ENSBTAG00000002988	macoilin 1 [Source:VGNC Symbol;Acc:VGNC:36098]
2	127888646	128008111	MAN1C1	ENSBTAG00000003069	mannosidase alpha class 1C member 1 [Source:VGNC Symbol;Acc:VGNC:31163]
2	125213837	125255802	OPRD1	ENSBTAG00000003202	opioid receptor delta 1 [Source:VGNC Symbol;Acc:VGNC:50539]
2	123392015	123401324	MATN1	ENSBTAG00000003479	matrilin 1 [Source:VGNC Symbol;Acc:VGNC:31264]
2	132587705	132600729	DDOST	ENSBTAG00000006085	dolichyl-diphosphooligosaccharide--protein glycosyltransferase non-catalytic subunit [Source:VGNC Symbol;Acc:VGNC:27952]
2	132636462	132657392	CDA	ENSBTAG00000006136	cytidine deaminase [Source:VGNC Symbol;Acc:VGNC:27055]
2	131624285	131696605	USP48	ENSBTAG00000006940	ubiquitin specific peptidase 48 [Source:VGNC Symbol;Acc:VGNC:36733]
2	131791680	131857642	ALPL	ENSBTAG00000008951	alkaline phosphatase, liver/bone/kidney [Source:VGNC Symbol;Acc:VGNC:25850]
2	131425507	131432711	CELA3B	ENSBTAG00000013085	chymotrypsin-like elastase family, member 3B [Source:NCBI gene;Acc:281752]
2	85077801	85097107	STK17B	ENSBTAG00000013196	serine/threonine kinase 17b [Source:VGNC Symbol;Acc:VGNC:35388]
2	125294728	125324175	YTHDF2	ENSBTAG00000015771	YTH N6-methyladenosine RNA binding protein 2 [Source:VGNC Symbol;Acc:VGNC:37042]
2	130900401	130937992	ZBTB40	ENSBTAG00000016448	zinc finger and BTB domain containing 40 [Source:VGNC Symbol;Acc:VGNC:37079]
2	130103590	130132649	HNRNPR	ENSBTAG00000016578	heterogeneous nuclear ribonucleoprotein R [Source:VGNC Symbol;Acc:VGNC:29899]
2	131517579	131587498	HSPG2	ENSBTAG00000017122	heparan sulfate proteoglycan 2 [Source:VGNC Symbol;Acc:VGNC:29988]
2	132533579	132584194	KIF17	ENSBTAG00000017644	kinesin family member 17 [Source:VGNC Symbol;Acc:VGNC:30586]
2	132470750	132507576	HP1BP3	ENSBTAG00000018656	heterochromatin protein 1 binding protein 3 [Source:VGNC Symbol;Acc:VGNC:29935]
2	123070708	123196529	PUM1	ENSBTAG00000018979	pumilio RNA binding family member 1 [Source:VGNC Symbol;Acc:VGNC:33569]
2	130830285	130858979	EPHA8	ENSBTAG00000020102	EPH receptor A8 [Source:VGNC Symbol;Acc:VGNC:28538]
2	85136811	85285250	HECW2	ENSBTAG00000020696	HECT, C2 and WW domain containing E3 ubiquitin protein ligase 2 [Source:HGNC Symbol;Acc:HGNC:29853]
2	132731029	132738645	MUL1	ENSBTAG00000020850	mitochondrial E3 ubiquitin protein ligase 1 [Source:VGNC Symbol;Acc:VGNC:31760]
2	131304772	131315806	WNT4	ENSBTAG00000022671	Wnt family member 4 [Source:VGNC Symbol;Acc:VGNC:36959]
2	89783382	89858016		ENSBTAG00000026812
2	131462792	131466400		ENSBTAG00000030269	uncharacterized LOC789612 [Source:NCBI gene;Acc:789612]
2	76761756	77286491	CNTNAP5	ENSBTAG00000031898	contactin associated protein like 5 [Source:HGNC Symbol;Acc:HGNC:18748]
2	89699124	89771871	AOX4	ENSBTAG00000038878	Bos taurus aldehyde oxidase 1-like (AOX4), mRNA. [Source:RefSeq mRNA;Acc:NM_001281919]
2	132097562	132451412	EIF4G3	ENSBTAG00000040215	eukaryotic translation initiation factor 4 gamma 3 [Source:VGNC Symbol;Acc:VGNC:28417]
2	131410548	131414758		ENSBTAG00000040602	SCAN domain containing 1-like [Source:NCBI gene;Acc:515042]
2	128245274	128245380	RF00026	ENSBTAG00000042129
2	123179899	123179981	RF00188	ENSBTAG00000042142
2	123192312	123192396	RF00188	ENSBTAG00000042775
2	123159836	123159912	RF00188	ENSBTAG00000042860
2	131334482	131334588	RF00026	ENSBTAG00000042891
2	125334330	125334436	RF00026	ENSBTAG00000043380
2	123153220	123153301	RF00188	ENSBTAG00000043864
2	130903852	130903927	bta-mir-2284u	ENSBTAG00000045330	bta-mir-2284u [Source:miRBase;Acc:MI0011387]
2	132691772	132692743	FAM43B	ENSBTAG00000046988	family with sequence similarity 43 member B [Source:VGNC Symbol;Acc:VGNC:28814]
2	85132987	85133945		ENSBTAG00000047862
3	9090441	9129487	SLAMF1	ENSBTAG00000007927	signaling lymphocytic activation molecule family member 1 [Source:VGNC Symbol;Acc:VGNC:34653]
3	100217682	100223303	DMBX1	ENSBTAG00000009625	diencephalon/mesencephalon homeobox 1 [Source:VGNC Symbol;Acc:VGNC:28104]
3	9022904	9053379	CD48	ENSBTAG00000011238	CD48 molecule [Source:VGNC Symbol;Acc:VGNC:27036]
3	100126262	100172587	MKNK1	ENSBTAG00000019933	MAP kinase interacting serine/threonine kinase 1 [Source:VGNC Symbol;Acc:VGNC:31491]
3	100113666	100122214	MOB3C	ENSBTAG00000023551	MOB kinase activator 3C [Source:VGNC Symbol;Acc:VGNC:31546]
3	100179028	100183069	KNCN	ENSBTAG00000030532	kinocilin [Source:VGNC Symbol;Acc:VGNC:30696]
3	9089634	9089726	RF00026	ENSBTAG00000043605
4	77458516	77512436	OGDH	ENSBTAG00000006029	oxoglutarate dehydrogenase [Source:VGNC Symbol;Acc:VGNC:32406]
4	77598538	77670087	NUDCD3	ENSBTAG00000006325	NudC domain containing 3 [Source:VGNC Symbol;Acc:VGNC:32324]
4	76870137	76970341	ADCY1	ENSBTAG00000009520	adenylate cyclase 1 [Source:VGNC Symbol;Acc:VGNC:25642]
4	77546487	77555844	DDX56	ENSBTAG00000010602	DEAD-box helicase 56 [Source:VGNC Symbol;Acc:VGNC:27978]
4	77540574	77543351	TMED4	ENSBTAG00000010612	transmembrane p24 trafficking protein 4 [Source:VGNC Symbol;Acc:VGNC:35937]
4	77432315	77441756	ZMIZ2	ENSBTAG00000011997	zinc finger MIZ-type containing 2 [Source:VGNC Symbol;Acc:VGNC:37196]
4	77409433	77413143	PPIA	ENSBTAG00000012003	peptidylprolyl isomerase A [Source:NCBI gene;Acc:281418]
4	77389255	77401081	H2AFV	ENSBTAG00000016975	H2A histone family, member V [Source:NCBI gene;Acc:613618]
4	45594206	45682229	ORC5	ENSBTAG00000040058	origin recognition complex subunit 5 [Source:VGNC Symbol;Acc:VGNC:32450]
4	77572132	77593152	NPC1L1	ENSBTAG00000044146	NPC1 like intracellular cholesterol transporter 1 [Source:VGNC Symbol;Acc:VGNC:32195]
5	97081921	97101600	EMP1	ENSBTAG00000036078	epithelial membrane protein 1 [Source:VGNC Symbol;Acc:VGNC:28481]
7	96124692	96354407	KIAA0825	ENSBTAG00000003144	KIAA0825 [Source:VGNC Symbol;Acc:VGNC:30556]
7	96366971	96422024	SLF1	ENSBTAG00000006107	SMC5-SMC6 complex localization factor 1 [Source:VGNC Symbol;Acc:VGNC:52883]
7	75895256	76022776	GABRG2	ENSBTAG00000010251	gamma-aminobutyric acid type A receptor gamma2 subunit [Source:VGNC Symbol;Acc:VGNC:29200]
7	75522540	75539456	GABRA6	ENSBTAG00000013262	gamma-aminobutyric acid type A receptor alpha6 subunit [Source:VGNC Symbol;Acc:VGNC:29195]
7	75703666	75759741	GABRA1	ENSBTAG00000030286	gamma-aminobutyric acid type A receptor alpha1 subunit [Source:VGNC Symbol;Acc:VGNC:29191]
8	88423429	88529462	SYK	ENSBTAG00000004767	spleen associated tyrosine kinase [Source:VGNC Symbol;Acc:VGNC:35513]
8	70406944	70412090		ENSBTAG00000005466
8	70414190	70429165	CCAR2	ENSBTAG00000005469	cell cycle and apoptosis regulator 2 [Source:VGNC Symbol;Acc:VGNC:26827]
8	70429462	70480013	BIN3	ENSBTAG00000005470	bridging integrator 3 [Source:VGNC Symbol;Acc:VGNC:52607]
8	70388329	70401480	PDLIM2	ENSBTAG00000007369	PDZ and LIM domain 2 [Source:VGNC Symbol;Acc:VGNC:32708]
8	70354893	70384759	SORBS3	ENSBTAG00000014401	sorbin and SH3 domain containing 3 [Source:VGNC Symbol;Acc:VGNC:35129]
9	98421510	99568077	PRKN	ENSBTAG00000018996	parkin RBR E3 ubiquitin protein ligase [Source:VGNC Symbol;Acc:VGNC:33342]
10	22106909	23304334		ENSBTAG00000000432
10	36092995	36103677	DISP2	ENSBTAG00000000552	dispatched RND transporter family member 2 [Source:VGNC Symbol;Acc:VGNC:28075]
10	36980593	37025485	RTF1	ENSBTAG00000001671	RTF1 homolog, Paf1/RNA polymerase II complex component [Source:VGNC Symbol;Acc:VGNC:34195]
10	37035180	37043518	ITPKA	ENSBTAG00000001675	inositol-trisphosphate 3-kinase A [Source:VGNC Symbol;Acc:VGNC:30344]
10	37055212	37071120	RPAP1	ENSBTAG00000001693	RNA polymerase II associated protein 1 [Source:VGNC Symbol;Acc:VGNC:34098]
10	37078592	37095809	TYRO3	ENSBTAG00000001694	TYRO3 protein tyrosine kinase [Source:VGNC Symbol;Acc:VGNC:36551]
10	32328992	32570684	C10H15orf41	ENSBTAG00000002179	chromosome 10 C15orf41 homolog [Source:VGNC Symbol;Acc:VGNC:52611]
10	53089215	53481049	TCF12	ENSBTAG00000002586	transcription factor 12 [Source:VGNC Symbol;Acc:VGNC:35686]
10	73694668	73927120	PRKCH	ENSBTAG00000003276	protein kinase C eta [Source:VGNC Symbol;Acc:VGNC:33332]
10	37890185	37941980	ZNF106	ENSBTAG00000004079	zinc finger protein 106 [Source:VGNC Symbol;Acc:VGNC:37207]
10	36140626	36152399	IVD	ENSBTAG00000004409	isovaleryl-CoA dehydrogenase [Source:VGNC Symbol;Acc:VGNC:50203]
10	36180773	36187722	BAHD1	ENSBTAG00000004420	bromo adjacent homology domain containing 1 [Source:VGNC Symbol;Acc:VGNC:26411]
10	36191061	36193015	CHST14	ENSBTAG00000004421	carbohydrate sulfotransferase 14 [Source:VGNC Symbol;Acc:VGNC:27342]
10	38912008	38912352		ENSBTAG00000004692
10	62467611	62489654	SLC24A5	ENSBTAG00000004854	solute carrier family 24 member 5 [Source:VGNC Symbol;Acc:VGNC:34740]
10	37602795	37624778	PLA2G4D	ENSBTAG00000005268	phospholipase A2 group IVD [Source:VGNC Symbol;Acc:VGNC:32961]
10	51247755	51272733	CCNB2	ENSBTAG00000005269	cyclin B2 [Source:VGNC Symbol;Acc:VGNC:26960]
10	51758913	51921260	LIPC	ENSBTAG00000005479	lipase C, hepatic type [Source:HGNC Symbol;Acc:HGNC:6619]
10	51598073	51739153	ADAM10	ENSBTAG00000005481	ADAM metallopeptidase domain 10 [Source:VGNC Symbol;Acc:VGNC:25604]
10	37946231	37986849	SNAP23	ENSBTAG00000005661	synaptosome associated protein 23 [Source:VGNC Symbol;Acc:VGNC:35050]
10	37995372	38008615	HAUS2	ENSBTAG00000005663	HAUS augmin like complex subunit 2 [Source:VGNC Symbol;Acc:VGNC:29758]
10	39914871	40445335	MDGA2	ENSBTAG00000005697	MAM domain containing glycosylphosphatidylinositol anchor 2 [Source:VGNC Symbol;Acc:VGNC:31332]
10	58026028	58152577	MYO5A	ENSBTAG00000006489	myosin VA [Source:VGNC Symbol;Acc:VGNC:31826]
10	37346275	37355599	PLA2G4B	ENSBTAG00000006784	phospholipase A2, group IVB (cytosolic) [Source:NCBI gene;Acc:505485]
10	37355715	37405210	SPTBN5	ENSBTAG00000006790	spectrin beta, non-erythrocytic 5 [Source:VGNC Symbol;Acc:VGNC:35255]
10	37412316	37496211	EHD4	ENSBTAG00000006792	EH domain containing 4 [Source:VGNC Symbol;Acc:VGNC:28374]
10	73380212	73450167	SLC38A6	ENSBTAG00000007931	solute carrier family 38 member 6 [Source:VGNC Symbol;Acc:VGNC:34853]
10	36793944	36832672	EXD1	ENSBTAG00000008363	exonuclease 3'-5' domain containing 1 [Source:VGNC Symbol;Acc:VGNC:28639]
10	52835256	52941952	CGNL1	ENSBTAG00000008575	cingulin like 1 [Source:VGNC Symbol;Acc:VGNC:27259]
10	62436178	62467099	MYEF2	ENSBTAG00000008771	myelin expression factor 2 [Source:VGNC Symbol;Acc:VGNC:31791]
10	37715493	37754263	TMEM87A	ENSBTAG00000008863	transmembrane protein 87A [Source:VGNC Symbol;Acc:VGNC:36118]
10	37754445	37817713	GANC	ENSBTAG00000008866	glucosidase alpha, neutral C [Source:VGNC Symbol;Acc:VGNC:29246]
10	37828797	37885860	CAPN3	ENSBTAG00000008868	calpain 3 [Source:VGNC Symbol;Acc:VGNC:26747]
10	50707614	50712733	GCNT3	ENSBTAG00000009443	glucosaminyl (N-acetyl) transferase 3, mucin type [Source:NCBI gene;Acc:404167]
10	49860062	49904536	ANXA2	ENSBTAG00000009615	annexin A2 [Source:NCBI gene;Acc:282689]
10	62319877	62405827	SLC12A1	ENSBTAG00000010145	solute carrier family 12 member 1 [Source:VGNC Symbol;Acc:VGNC:34664]
10	50655754	50687544	GTF2A2	ENSBTAG00000010298	general transcription factor IIA subunit 2 [Source:VGNC Symbol;Acc:VGNC:29692]
10	36577285	36586360	DLL4	ENSBTAG00000010361	delta like canonical Notch ligand 4 [Source:VGNC Symbol;Acc:VGNC:28096]
10	36598394	36600764	CHAC1	ENSBTAG00000010371	ChaC glutathione specific gamma-glutamylcyclotransferase 1 [Source:VGNC Symbol;Acc:VGNC:27262]
10	36619650	36715000	INO80	ENSBTAG00000010380	INO80 complex subunit [Source:VGNC Symbol;Acc:VGNC:30205]
10	36896853	36905744	OIP5	ENSBTAG00000010766	Opa interacting protein 5 [Source:VGNC Symbol;Acc:VGNC:32415]
10	36906002	36936265	NUSAP1	ENSBTAG00000010774	nucleolar and spindle associated protein 1 [Source:VGNC Symbol;Acc:VGNC:32370]
10	36938124	36948842	NDUFAF1	ENSBTAG00000010778	NADH:ubiquinone oxidoreductase complex assembly factor 1 [Source:VGNC Symbol;Acc:VGNC:31953]
10	36546258	36554962	VPS18	ENSBTAG00000011567	VPS18, CORVET/HOPS core subunit [Source:VGNC Symbol;Acc:VGNC:36812]
10	51842778	51843501		ENSBTAG00000011764
10	73369417	73380029	TRMT5	ENSBTAG00000011796	tRNA methyltransferase 5 [Source:VGNC Symbol;Acc:VGNC:36373]
10	60431149	60639149	ATP8B4	ENSBTAG00000011936	ATPase phospholipid transporting 8B4 (putative) [Source:NCBI gene;Acc:100137953]
10	35350329	35538497	FSIP1	ENSBTAG00000012015	fibrous sheath interacting protein 1 [Source:VGNC Symbol;Acc:VGNC:29133]
10	73068706	73072802	SIX1	ENSBTAG00000012139	SIX homeobox 1 [Source:VGNC Symbol;Acc:VGNC:54483]
10	51500301	51570991	MINDY2	ENSBTAG00000012391	MINDY lysine 48 deubiquitinase 2 [Source:VGNC Symbol;Acc:VGNC:31477]
10	72953088	72955661	SIX6	ENSBTAG00000013035	SIX homeobox 6 [Source:VGNC Symbol;Acc:VGNC:34642]
10	50628361	50650638	BNIP2	ENSBTAG00000013493	BCL2 interacting protein 2 [Source:VGNC Symbol;Acc:VGNC:26532]
10	36068634	36074651	CCDC9B	ENSBTAG00000013774	coiled-coil domain containing 9B [Source:HGNC Symbol;Acc:HGNC:33488]
10	65766164	65843942	FERMT2	ENSBTAG00000014501	fermitin family member 2 [Source:VGNC Symbol;Acc:VGNC:28953]
10	37206356	37206838		ENSBTAG00000014662
10	50870432	50931413	FAM81A	ENSBTAG00000014699	family with sequence similarity 81 member A [Source:VGNC Symbol;Acc:VGNC:28830]
10	37193026	37281324	MGA	ENSBTAG00000015138	MGA, MAX dimerization protein [Source:VGNC Symbol;Acc:VGNC:31445]
10	37288355	37336641	MAPKBP1	ENSBTAG00000015142	mitogen-activated protein kinase binding protein 1 [Source:VGNC Symbol;Acc:VGNC:31231]
10	48949618	49750993	RORA	ENSBTAG00000015904	RAR related orphan receptor A [Source:VGNC Symbol;Acc:VGNC:34088]
10	73648527	73649642	TMEM30B	ENSBTAG00000016713	transmembrane protein 30B [Source:VGNC Symbol;Acc:VGNC:36075]
10	35566119	35695711	GPR176	ENSBTAG00000016826	G protein-coupled receptor 176 [Source:VGNC Symbol;Acc:VGNC:29572]
10	50282171	50283148	FOXB1	ENSBTAG00000019114	forkhead box B1 [Source:VGNC Symbol;Acc:VGNC:29080]
10	51020033	51240077	MYO1E	ENSBTAG00000021538	myosin IE [Source:VGNC Symbol;Acc:VGNC:31820]
10	37506677	37549023	PLA2G4E	ENSBTAG00000021924	phospholipase A2 group IVE [Source:HGNC Symbol;Acc:HGNC:24791]
10	73153517	73363530	MNAT1	ENSBTAG00000030801	MNAT1, CDK activating kinase assembly factor [Source:VGNC Symbol;Acc:VGNC:31537]
10	37989936	37995280	LRRC57	ENSBTAG00000031981	leucine rich repeat containing 57 [Source:NCBI gene;Acc:508699]
10	37668738	37713608	VPS39	ENSBTAG00000032055	VPS39, HOPS complex subunit [Source:VGNC Symbol;Acc:VGNC:36822]
10	37650256	37664678	PLA2G4F	ENSBTAG00000032068	phospholipase A2 group IVF [Source:VGNC Symbol;Acc:VGNC:32962]
10	36117898	36127741	KNSTRN	ENSBTAG00000032340	kinetochore localized astrin (SPAG5) binding protein [Source:VGNC Symbol;Acc:VGNC:30698]
10	65798496	65798619	RF00001	ENSBTAG00000037199
10	51823326	51823444	RF00001	ENSBTAG00000037226
10	36757276	36758438		ENSBTAG00000038438
10	37139531	37139637	RF00026	ENSBTAG00000042188
10	51948280	51948379	RF00026	ENSBTAG00000042541
10	50657425	50657551	RF00413	ENSBTAG00000043816
10	51885645	51885757	RF00001	ENSBTAG00000043926
10	51826400	51826528		ENSBTAG00000044518
10	58120394	58120570	RF01241	ENSBTAG00000044748
10	73632148	73632220	RF01169	ENSBTAG00000045169
10	34736653	34736722		ENSBTAG00000045437
10	62412034	62412276	CTXN2	ENSBTAG00000045847	cortexin 2 [Source:VGNC Symbol;Acc:VGNC:27826]
10	38814396	38814674		ENSBTAG00000046363
10	37338864	37345321	JMJD7	ENSBTAG00000046607	jumonji domain containing 7 [Source:NCBI gene;Acc:100137087]
10	73628027	73629463		ENSBTAG00000047000
10	65747190	65747567		ENSBTAG00000047170	histone H2B type 2-E [Source:NCBI gene;Acc:613752]
10	23157033	23157612		ENSBTAG00000047276
12	34924193	34954970	SGCG	ENSBTAG00000001865	sarcoglycan gamma [Source:VGNC Symbol;Acc:VGNC:34539]
12	34876100	34917630	SACS	ENSBTAG00000001867	sacsin molecular chaperone [Source:VGNC Symbol;Acc:VGNC:34260]
12	33754809	34054513	ATP8A2	ENSBTAG00000019529	ATPase phospholipid transporting 8A2 [Source:HGNC Symbol;Acc:HGNC:13533]
12	33978760	33978865	RF00026	ENSBTAG00000042230
13	23900873	24085889	PIP4K2A	ENSBTAG00000018033	phosphatidylinositol-5-phosphate 4-kinase type 2 alpha [Source:VGNC Symbol;Acc:VGNC:32906]
13	53845848	53865217		ENSBTAG00000039016
13	53903061	53988803	SIRPB1	ENSBTAG00000039520	signal-regulatory protein beta 1 [Source:NCBI gene;Acc:529990]
13	11543628	11636251	CCDC3	ENSBTAG00000040490	coiled-coil domain containing 3 [Source:NCBI gene;Acc:509875]
13	69811970	69812076	RF00026	ENSBTAG00000042334
13	24073637	24073742	RF00020	ENSBTAG00000044698
13	24655214	24656659	OTUD1	ENSBTAG00000047752	OTU deubiquitinase 1 [Source:VGNC Symbol;Acc:VGNC:32493]
14	25007291	25009296	PLAG1	ENSBTAG00000004022	PLAG1 zinc finger [Source:VGNC Symbol;Acc:VGNC:32971]
14	35476252	35558292	SULF1	ENSBTAG00000004720	sulfatase 1 [Source:VGNC Symbol;Acc:VGNC:53880]
14	25105062	25117554	SDR16C5	ENSBTAG00000018570	short chain dehydrogenase/reductase family 16C member 5 [Source:VGNC Symbol;Acc:VGNC:34395]
14	24975950	24976948	MOS	ENSBTAG00000019145	MOS proto-oncogene, serine/threonine kinase [Source:VGNC Symbol;Acc:VGNC:31563]
14	24955079	24956324	RPS20	ENSBTAG00000019147	ribosomal protein S20 [Source:VGNC Symbol;Acc:VGNC:34133]
14	24847257	24920713	LYN	ENSBTAG00000020034	LYN proto-oncogene, Src family tyrosine kinase [Source:VGNC Symbol;Acc:VGNC:31098]
14	50606043	50606353		ENSBTAG00000026157	histone H4 [Source:NCBI gene;Acc:781434]
14	24970516	24970679	RF00003	ENSBTAG00000028889
14	35583263	35727312	SLCO5A1	ENSBTAG00000032881	solute carrier organic anion transporter family member 5A1 [Source:VGNC Symbol;Acc:VGNC:34956]
14	25052885	25058779	CHCHD7	ENSBTAG00000033284	coiled-coil-helix-coiled-coil-helix domain containing 7 [Source:VGNC Symbol;Acc:VGNC:27275]
14	35568651	35569172		ENSBTAG00000037399
14	25067486	25067823		ENSBTAG00000039031
14	25153583	25179651	SDR16C6	ENSBTAG00000040321	short chain dehydrogenase/reductase family 16C, member 6 [Source:NCBI gene;Acc:525500]
14	24955769	24955835	RF01277	ENSBTAG00000045097
15	35650715	35653362	KCNJ11	ENSBTAG00000016170	potassium voltage-gated channel subfamily J member 11 [Source:VGNC Symbol;Acc:VGNC:30455]
15	35693278	35715902	NUCB2	ENSBTAG00000017468	nucleobindin 2 [Source:VGNC Symbol;Acc:VGNC:32319]
16	72241105	72445379	RPS6KC1	ENSBTAG00000001181	ribosomal protein S6 kinase C1 [Source:VGNC Symbol;Acc:VGNC:34148]
16	3099023	3108506	CDK18	ENSBTAG00000012673	cyclin dependent kinase 18 [Source:VGNC Symbol;Acc:VGNC:27121]
16	3031951	3032045	bta-mir-135b	ENSBTAG00000029815	bta-mir-135b [Source:miRBase;Acc:MI0009738]
16	2975238	3005255	LEMD1	ENSBTAG00000034632	LEM domain containing 1 [Source:VGNC Symbol;Acc:VGNC:30835]
16	2517338	2517409	RF01169	ENSBTAG00000044886
16	72422139	72422861		ENSBTAG00000046070
17	55899388	56017498	KDM2B	ENSBTAG00000002328	lysine demethylase 2B [Source:VGNC Symbol;Acc:VGNC:30524]
18	56505738	56516430	SCAF1	ENSBTAG00000006612	SR-related CTD associated factor 1 [Source:VGNC Symbol;Acc:VGNC:34313]
18	56517723	56523302	IRF3	ENSBTAG00000006633	interferon regulatory factor 3 [Source:VGNC Symbol;Acc:VGNC:30274]
18	56523439	56530499	BCL2L12	ENSBTAG00000006638	BCL2 like 12 [Source:VGNC Symbol;Acc:VGNC:26447]
18	56534833	56545053	PRMT1	ENSBTAG00000006646	protein arginine methyltransferase 1 [Source:VGNC Symbol;Acc:VGNC:52239]
18	56547752	56566692	CPT1C	ENSBTAG00000012205	carnitine palmitoyltransferase 1C [Source:VGNC Symbol;Acc:VGNC:27678]
18	56443747	56455743	NOSIP	ENSBTAG00000014450	nitric oxide synthase interacting protein [Source:VGNC Symbol;Acc:VGNC:32175]
18	56464410	56492478	PRR12	ENSBTAG00000014454	proline rich 12 [Source:VGNC Symbol;Acc:VGNC:33389]
18	57997837	58000711		ENSBTAG00000019227	sialic acid-binding Ig-like lectin 14 [Source:NCBI gene;Acc:107131224]
18	56497094	56501119	RRAS	ENSBTAG00000020983	RAS related [Source:VGNC Symbol;Acc:VGNC:49146]
18	57927152	57929923		ENSBTAG00000023365	cytoplasmic tRNA 2-thiolation protein 1 [Source:NCBI gene;Acc:100297056]
18	56456530	56462123	PRRG2	ENSBTAG00000030563	proline rich and Gla domain 2 [Source:VGNC Symbol;Acc:VGNC:33407]
18	57971424	57975412		ENSBTAG00000035868
18	57900691	57910816	ZNF175	ENSBTAG00000040603	zinc finger protein 175 [Source:VGNC Symbol;Acc:VGNC:49992]
18	57938695	57953490		ENSBTAG00000045880	sialic acid-binding Ig-like lectin 5 [Source:NCBI gene;Acc:100300478]
19	53181379	53245548	TBC1D16	ENSBTAG00000003192	TBC1 domain family member 16 [Source:VGNC Symbol;Acc:VGNC:35630]
19	57567606	57577938	CD300LB	ENSBTAG00000008327	CD300 molecule-like family member b [Source:NCBI gene;Acc:789755]
19	57552926	57556471		ENSBTAG00000008328
19	53048429	53069156	CARD14	ENSBTAG00000015261	caspase recruitment domain family member 14 [Source:VGNC Symbol;Acc:VGNC:26762]
19	53041244	53048384	SGSH	ENSBTAG00000015267	N-sulfoglucosamine sulfohydrolase [Source:VGNC Symbol;Acc:VGNC:34549]
19	53023436	53041077	SLC26A11	ENSBTAG00000015276	solute carrier family 26 member 11 [Source:VGNC Symbol;Acc:VGNC:34776]
19	53117575	53158255	CCDC40	ENSBTAG00000016017	coiled-coil domain containing 40 [Source:VGNC Symbol;Acc:VGNC:26895]
19	53100965	53113264	GAA	ENSBTAG00000016021	glucosidase alpha, acid [Source:VGNC Symbol;Acc:VGNC:29182]
19	53085463	53097208	EIF4A3	ENSBTAG00000016023	eukaryotic translation initiation factor 4A3 [Source:VGNC Symbol;Acc:VGNC:28406]
19	52947903	53006764		ENSBTAG00000017233
19	57500202	57504157		ENSBTAG00000024901
19	53108151	53108444		ENSBTAG00000030186	up-regulated during skeletal muscle growth protein 5 [Source:NCBI gene;Acc:101907000]
20	23305806	23355111	IL31RA	ENSBTAG00000004351	interleukin 31 receptor A [Source:VGNC Symbol;Acc:VGNC:30154]
20	23379443	23444459	DDX4	ENSBTAG00000008871	DEAD-box helicase 4 [Source:VGNC Symbol;Acc:VGNC:27966]
22	13346709	13416401	ZNF621	ENSBTAG00000018057	zinc finger protein 621 [Source:NCBI gene;Acc:530346]
23	30764310	30764720		ENSBTAG00000024175	histone cluster 1, H3c [Source:NCBI gene;Acc:616800]
23	30761086	30761573	HIST1H2AG	ENSBTAG00000024176	histone cluster 1, H2ag [Source:NCBI gene;Acc:616790]
23	30760352	30760837		ENSBTAG00000024177	histone H2B type 1 [Source:NCBI gene;Acc:100295221]
23	30757225	30757615		ENSBTAG00000024178	histone H4 [Source:NCBI gene;Acc:527645]
23	30747808	30748119		ENSBTAG00000024179	histone H4 [Source:NCBI gene;Acc:527645]
23	30741968	30742360		ENSBTAG00000024180	histone cluster 1, H2 [Source:NCBI gene;Acc:614970]
23	30730958	30731338		ENSBTAG00000024182	histone H2B type 1 [Source:NCBI gene;Acc:100295221]
23	30730260	30730652		ENSBTAG00000024183	histone H2A type 1 [Source:NCBI gene;Acc:529277]
23	30726423	30726833		ENSBTAG00000024184	histone cluster 1, H3c [Source:NCBI gene;Acc:616800]
23	30724826	30725137		ENSBTAG00000024185	histone H4 [Source:NCBI gene;Acc:527645]
23	30715880	30716290		ENSBTAG00000024186	histone cluster 1, H3c [Source:NCBI gene;Acc:616800]
23	30714064	30714456		ENSBTAG00000024187	histone H2A type 1 [Source:NCBI gene;Acc:529277]
23	30713382	30713762		ENSBTAG00000024188	histone H2B type 1 [Source:NCBI gene;Acc:100295221]
23	30737493	30741740	HIST1H2BB	ENSBTAG00000031886	histone cluster 1, H2bn [Source:NCBI gene;Acc:614958]
23	30766891	30767343		ENSBTAG00000031888
23	30767650	30768030		ENSBTAG00000031889	histone H2B type 1 [Source:NCBI gene;Acc:100295221]
23	30695956	30696900		ENSBTAG00000039274	olfactory receptor 2B2 [Source:NCBI gene;Acc:783002]
23	184673	864355	KHDRBS2	ENSBTAG00000043990	KH RNA binding domain containing, signal transduction associated 2 [Source:VGNC Symbol;Acc:VGNC:30541]
23	30835083	30835202		ENSBTAG00000044946
23	30788153	30788230	bta-mir-2379	ENSBTAG00000045181	bta-mir-2379 [Source:miRBase;Acc:MI0011414]
24	41576970	41689810	MTCL1	ENSBTAG00000009459	microtubule crosslinking factor 1 [Source:VGNC Symbol;Acc:VGNC:31718]
24	41532521	41541737	RAB12	ENSBTAG00000010356	RAB12, member RAS oncogene family [Source:VGNC Symbol;Acc:VGNC:33620]
26	21248525	21280208	SEC31B	ENSBTAG00000000090	SEC31 homolog B, COPII coat complex component [Source:VGNC Symbol;Acc:VGNC:34418]
26	21283406	21288806	NDUFB8	ENSBTAG00000000091	NADH:ubiquinone oxidoreductase subunit B8 [Source:NCBI gene;Acc:282517]
26	21291076	21300157	HIF1AN	ENSBTAG00000000092	hypoxia inducible factor 1 subunit alpha inhibitor [Source:VGNC Symbol;Acc:VGNC:29849]
26	24786360	24844579	SLK	ENSBTAG00000001017	STE20 like kinase [Source:VGNC Symbol;Acc:VGNC:34968]
26	22375029	22380835	FGF8	ENSBTAG00000001530	fibroblast growth factor 8 [Source:VGNC Symbol;Acc:VGNC:28983]
26	21894402	21896298	LBX1	ENSBTAG00000002261	ladybird homeobox 1 [Source:VGNC Symbol;Acc:VGNC:30805]
26	24848931	24896345	COL17A1	ENSBTAG00000002430	collagen type XVII alpha 1 chain [Source:VGNC Symbol;Acc:VGNC:27558]
26	22228480	22311346	FBXW4	ENSBTAG00000003579	F-box and WD repeat domain containing 4 [Source:VGNC Symbol;Acc:VGNC:28924]
26	24330861	24403159	NEURL1	ENSBTAG00000003741	neuralized E3 ubiquitin protein ligase 1 [Source:VGNC Symbol;Acc:VGNC:32013]
26	24284483	24287960	CALHM1	ENSBTAG00000007044	calcium homeostasis modulator 1 [Source:VGNC Symbol;Acc:VGNC:26707]
26	22001775	22172725	BTRC	ENSBTAG00000007476	beta-transducin repeat containing E3 ubiquitin protein ligase [Source:VGNC Symbol;Acc:VGNC:26603]
26	20966010	21008277	CHUK	ENSBTAG00000007591	conserved helix-loop-helix ubiquitous kinase [Source:VGNC Symbol;Acc:VGNC:27354]
26	21010622	21035035	CWF19L1	ENSBTAG00000007594	CWF19 like 1, cell cycle control (S. pombe) [Source:NCBI gene;Acc:506212]
26	24232143	24274045	PDCD11	ENSBTAG00000009715	programmed cell death 11 [Source:VGNC Symbol;Acc:VGNC:32659]
26	24275663	24281013	CALHM2	ENSBTAG00000009719	calcium homeostasis modulator family member 2 [Source:VGNC Symbol;Acc:VGNC:26708]
26	21043927	21053587	BLOC1S2	ENSBTAG00000010739	biogenesis of lysosomal organelles complex 1 subunit 2 [Source:VGNC Symbol;Acc:VGNC:26507]
26	21056133	21108833	PKD2L1	ENSBTAG00000010742	polycystin 2 like 1, transient receptor potential cation channel [Source:VGNC Symbol;Acc:VGNC:32936]
26	21823912	21829144	TLX1	ENSBTAG00000011080	T cell leukemia homeobox 1 [Source:NCBI gene;Acc:505304]
26	21760437	21762788	KAZALD1	ENSBTAG00000011489	Kazal type serine peptidase inhibitor domain 1 [Source:VGNC Symbol;Acc:VGNC:30410]
26	23795436	23972895	CNNM2	ENSBTAG00000012857	cyclin and CBS domain divalent metal cation transport mediator 2 [Source:VGNC Symbol;Acc:VGNC:27511]
26	21240570	21244552	WNT8B	ENSBTAG00000012914	Wnt family member 8B [Source:VGNC Symbol;Acc:VGNC:36965]
26	22446522	22608433	ARMH3	ENSBTAG00000013120	armadillo-like helical domain containing 3 [Source:VGNC Symbol;Acc:VGNC:52606]
26	22385932	22388123	NPM3	ENSBTAG00000016335	nucleophosmin/nucleoplasmin 3 [Source:VGNC Symbol;Acc:VGNC:32208]
26	22390930	22417746	OGA	ENSBTAG00000016336	O-GlcNAcase [Source:VGNC Symbol;Acc:VGNC:54465]
26	22422214	22440709	KCNIP2	ENSBTAG00000016343	potassium voltage-gated channel interacting protein 2 [Source:VGNC Symbol;Acc:VGNC:30451]
26	22623887	22626506	HPS6	ENSBTAG00000021942	HPS6, biogenesis of lysosomal organelles complex 2 subunit 3 [Source:VGNC Symbol;Acc:VGNC:29947]
26	21057820	21058839		ENSBTAG00000027715
26	24303869	24309613	CALHM3	ENSBTAG00000032761	calcium homeostasis modulator 3 [Source:VGNC Symbol;Acc:VGNC:26709]
26	21014545	21014692	RF00586	ENSBTAG00000043222	small nucleolar RNA, H/ACA box 12 [Source:HGNC Symbol;Acc:HGNC:32600]
26	24413186	24469653	SH3PXD2A	ENSBTAG00000044153	SH3 and PX domains 2A [Source:HGNC Symbol;Acc:HGNC:23664]
26	22391794	22391902	RF00001	ENSBTAG00000044417
26	21141592	21148318	SCD	ENSBTAG00000045728	stearoyl-CoA desaturase (delta-9-desaturase) [Source:NCBI gene;Acc:280924]
26	47635451	47651856	CLRN3	ENSBTAG00000047054	clarin 3 [Source:VGNC Symbol;Acc:VGNC:27464]
26	21132751	21133969		ENSBTAG00000047957	acyl-CoA desaturase-like [Source:NCBI gene;Acc:101906058]
29	43476403	43576128	NRXN2	ENSBTAG00000000244	neurexin 2 [Source:VGNC Symbol;Acc:VGNC:32271]
29	43590193	43602499	RASGRP2	ENSBTAG00000001029	RAS guanyl releasing protein 2 [Source:VGNC Symbol;Acc:VGNC:33748]
29	44248435	44269691	FRMD8	ENSBTAG00000002039	FERM domain containing 8 [Source:NCBI gene;Acc:515469]
29	44790176	44800852	GAL3ST3	ENSBTAG00000002772	galactose-3-O-sulfotransferase 3 [Source:VGNC Symbol;Acc:VGNC:29215]
29	44803791	44817398	SF3B2	ENSBTAG00000002778	splicing factor 3b subunit 2 [Source:VGNC Symbol;Acc:VGNC:34510]
29	44716272	44725594	TSGA10IP	ENSBTAG00000003093	testis specific 10 interacting protein [Source:VGNC Symbol;Acc:VGNC:36416]
29	44726692	44741763	SART1	ENSBTAG00000003094	SART1, U4/U6.U5 tri-snRNP-associated protein 1 [Source:VGNC Symbol;Acc:VGNC:34292]
29	43981731	43986407	TM7SF2	ENSBTAG00000005069	transmembrane 7 superfamily member 2 [Source:VGNC Symbol;Acc:VGNC:35910]
29	43986566	43987804	ZNHIT2	ENSBTAG00000005073	zinc finger HIT-type containing 2 [Source:VGNC Symbol;Acc:VGNC:37359]
29	43992489	43996386	MRPL49	ENSBTAG00000005075	mitochondrial ribosomal protein L49 [Source:VGNC Symbol;Acc:VGNC:31644]
29	43997381	44003325	SYVN1	ENSBTAG00000005076	synoviolin 1 [Source:NCBI gene;Acc:508358]
29	44671368	44672651	CCDC85B	ENSBTAG00000005382	coiled-coil domain containing 85B [Source:VGNC Symbol;Acc:VGNC:26924]
29	44552309	44553484	RNASEH2C	ENSBTAG00000005577	ribonuclease H2 subunit C [Source:VGNC Symbol;Acc:VGNC:34001]
29	44544726	44552254	KAT5	ENSBTAG00000005578	lysine acetyltransferase 5 [Source:VGNC Symbol;Acc:VGNC:30400]
29	44049774	44051704	SPDYC	ENSBTAG00000005772	speedy/RINGO cell cycle regulator family member C [Source:VGNC Symbol;Acc:VGNC:35199]
29	44673879	44679325	FOSL1	ENSBTAG00000006194	FOS like 1, AP-1 transcription factor subunit [Source:VGNC Symbol;Acc:VGNC:29075]
29	44691682	44693901	C29H11orf68	ENSBTAG00000006195	chromosome 29 open reading frame, human C11orf68 [Source:NCBI gene;Acc:100125880]
29	44694171	44696295	DRAP1	ENSBTAG00000006199	DR1 associated protein 1 [Source:VGNC Symbol;Acc:VGNC:28203]
29	44370408	44381438	SCYL1	ENSBTAG00000006740	SCY1 like pseudokinase 1 [Source:VGNC Symbol;Acc:VGNC:34374]
29	44380356	44400578	LTBP3	ENSBTAG00000006747	latent transforming growth factor beta binding protein 3 [Source:VGNC Symbol;Acc:VGNC:31073]
29	44064429	44089990	CAPN1	ENSBTAG00000010230	calpain 1 [Source:VGNC Symbol;Acc:VGNC:26740]
29	44092127	44114038		ENSBTAG00000010233	solute carrier family 22 member 20, pseudogene [Source:NCBI gene;Acc:526596]
29	44840076	44840543		ENSBTAG00000011370
29	44143171	44170094	POLA2	ENSBTAG00000011455	DNA polymerase alpha 2, accessory subunit [Source:VGNC Symbol;Acc:VGNC:33111]
29	44574560	44585598	OVOL1	ENSBTAG00000012656	ovo like transcriptional repressor 1 [Source:VGNC Symbol;Acc:VGNC:32505]
29	44766936	44768173	CST6	ENSBTAG00000014718	cystatin E/M [Source:NCBI gene;Acc:503685]
29	44772899	44779138		ENSBTAG00000014720
29	40648859	40657395	PPP1R32	ENSBTAG00000014830	protein phosphatase 1 regulatory subunit 32 [Source:VGNC Symbol;Acc:VGNC:33239]
29	43960635	43964193	ZFPL1	ENSBTAG00000015479	zinc finger protein like 1 [Source:VGNC Symbol;Acc:VGNC:37170]
29	43968702	43981536	VPS51	ENSBTAG00000015499	VPS51, GARP complex subunit [Source:VGNC Symbol;Acc:VGNC:36827]
29	40537653	40549701	TKFC	ENSBTAG00000018201	triokinase and FMN cyclase [Source:NCBI gene;Acc:512373]
29	40551223	40562584	CYB561A3	ENSBTAG00000018202	cytochrome b561 family member A3 [Source:VGNC Symbol;Acc:VGNC:50258]
29	40682320	40716882	SYT7	ENSBTAG00000019947	synaptotagmin 7 [Source:HGNC Symbol;Acc:HGNC:11514]
29	44756084	44759164	EIF1AD	ENSBTAG00000020186	eukaryotic translation initiation factor 1A domain containing [Source:VGNC Symbol;Acc:VGNC:28377]
29	44661698	44665098	CTSW	ENSBTAG00000020773	cathepsin W [Source:VGNC Symbol;Acc:VGNC:27819]
29	44665294	44669337	FIBP	ENSBTAG00000020775	FGF1 intracellular binding protein [Source:VGNC Symbol;Acc:VGNC:29006]
29	43990460	43991956		ENSBTAG00000020807
29	44634185	44637443	SNX32	ENSBTAG00000021454	sorting nexin 32 [Source:HGNC Symbol;Acc:HGNC:26423]
29	44638896	44642280	CFL1	ENSBTAG00000021455	cofilin 1 [Source:VGNC Symbol;Acc:VGNC:27253]
29	44644885	44650618	MUS81	ENSBTAG00000021456	MUS81 structure-specific endonuclease subunit [Source:VGNC Symbol;Acc:VGNC:31762]
29	44650628	44657896	EFEMP2	ENSBTAG00000021457	EGF containing fibulin extracellular matrix protein 2 [Source:VGNC Symbol;Acc:VGNC:28349]
29	40586490	40590842	TMEM216	ENSBTAG00000021517	transmembrane protein 216 [Source:VGNC Symbol;Acc:VGNC:36038]
29	40475303	40505451	VWCE	ENSBTAG00000021568	von Willebrand factor C and EGF domains [Source:VGNC Symbol;Acc:VGNC:36859]
29	40509559	40537404	DDB1	ENSBTAG00000021569	damage specific DNA binding protein 1 [Source:VGNC Symbol;Acc:VGNC:27941]
29	40562910	40568784	TMEM138	ENSBTAG00000021604	transmembrane protein 138 [Source:VGNC Symbol;Acc:VGNC:35971]
29	43943684	43960477	CDCA5	ENSBTAG00000026971	cell division cycle associated 5 [Source:NCBI gene;Acc:613318]
29	44759486	44761429	BANF1	ENSBTAG00000031875	barrier to autointegration factor 1 [Source:VGNC Symbol;Acc:VGNC:54634]
29	44088087	44088159	bta-mir-2407	ENSBTAG00000044262	bta-mir-2407 [Source:miRBase;Acc:MI0011450]
29	44620751	44624231		ENSBTAG00000046150
29	44770865	44771529		ENSBTAG00000046587
29	40742016	40742073	bta-mir-2885	ENSBTAG00000046860	bta-mir-2885 [Source:miRBase;Acc:MI0013058]
29	44563255	44566140	AP5B1	ENSBTAG00000046875	adaptor related protein complex 5 subunit beta 1 [Source:VGNC Symbol;Acc:VGNC:25995]
29	40674002	40676155	LRRC10B	ENSBTAG00000047786	leucine rich repeat containing 10B [Source:VGNC Symbol;Acc:VGNC:52797]
29	44583536	44584162		ENSBTAG00000047811

[truncated: 6 more sheets: S11, S12, S13, S14, S15, S16]
